# Supplementary material for: The Surveillance After Extremity Tumor Surgery (SAFETY) trial: protocol for a pilot study to determine the feasibility of a multi-centre randomised controlled trial
Source: PubMed Central journal article supplement — BMJ Open. 2019 Sep 18;9(9):e029054. doi: 10.1136/bmjopen-2019-029054 (PMC6756324; doi:10.1136/bmjopen-2019-029054), 2019-09-18
Supplement: bmjopen-2019-029054.draft_revisions.pdf [file bmjopen-2019-029054.draft_revisions.pdf]

# BMJ Open

BMJ Open is committed to open peer review. As part of this commitment we make the peer review history of every article we publish publicly available.

When an article is published we post the peer reviewers' comments and the authors' responses online. We also post the versions of the paper that were used during peer review. These are the versions that the peer review comments apply to.

The versions of the paper that follow are the versions that were submitted during the peer review process. They are not the versions of record or the final published versions. They should not be cited or distributed as the published version of this manuscript.

BMJ Open is an open access journal and the full, final, typeset and author-corrected version of record of the manuscript is available on our site with no access controls, subscription charges or pay-per-view fees (<http://bmjopen.bmj.com>).

If you have any questions on BMJ Open's open peer review process please email [info.bmjopen@bmj.com](mailto:info.bmjopen@bmj.com)

# BMJ Open

## **The Surveillance AftEr Extremity Tumour surgerY (SAFETY) Trial: Protocol for a pilot study to determine the feasibility of a multi-centre randomized controlled trial**

|                               |                                                                                                                 |
|-------------------------------|-----------------------------------------------------------------------------------------------------------------|
| Journal:                      | <i>BMJ Open</i>                                                                                                 |
| Manuscript ID                 | bmjopen-2019-029054                                                                                             |
| Article Type:                 | Protocol                                                                                                        |
| Date Submitted by the Author: | 12-Jan-2019                                                                                                     |
| Complete List of Authors:     | Ghert, Michelle; McMaster University, Department of Surgery; Hamilton Health Sciences, Juravinski Cancer Centre |
| Keywords:                     | surveillance, soft tissue sarcoma, study protocol, randomised controlled trial, pilot study                     |
|                               |                                                                                                                 |

SCHOLARONE™  
Manuscripts

1  
2  
3 *Original article*  
4

5 **The Surveillance AftEr Extremity Tumour surgerY (SAFETY) Trial: Protocol for a pilot**  
6  
7 **study to determine the feasibility of a multi-centre randomized controlled trial**  
8

9  
10 The SAFETY Investigators  
11

12  
13  
14 **Protocol version 1; December 3, 2018**  
15  
16  
17  
18  
19  
20  
21  
22  
23  
24  
25

26 **Correspondence and reprints**  
27

28 Michelle Ghert, MD, FRCSC  
29

30 Professor of Surgery  
31

32 Division of Orthopaedic Surgery  
33

34 Department of Surgery  
35

36 McMaster University  
37

38 711 Concession Street  
39

40 Hamilton, ON  
41

42 Canada  
43

44 Tel: 905-387-9495 ext 64089  
45

46 Fax: 905-381-7071  
47

48 Email: [mghert@hhsc.ca](mailto:mghert@hhsc.ca)  
49  
50

51 **Contributor list with affiliations**  
52  
53  
54  
55  
56  
57  
58  
59  
60

1  
2  
3 Michelle Ghert, MD, FRCSC (Steering Committee Chair)  
4 Department of Surgery, McMaster University (Hamilton, Ontario, Canada)  
5  
6

7 Mohit Bhandari, MD, PhD, FRCSC  
8 Department of Surgery & Department of Health Research Methods, Evidence and Impact,  
9 McMaster University (Hamilton, Ontario, Canada)  
10  
11

12 Anthony Bozzo, MD  
13 Department of Surgery, McMaster University (Hamilton, Ontario, Canada)  
14  
15

16 P.D. Sander Dijkstra, MD, PhD  
17 Department of Orthopaedics, Leiden University Medical Center (Leiden, the Netherlands)  
18  
19

20 Anthony Griffin, MSc  
21 Musculoskeletal Oncology Unit, Mount Sinai Hospital (Toronto, Ontario, Canada)  
22  
23

24 Robert Grimer, MB BS, DSc, FRCS, FRCS Ed(Orth)  
25 Department of Surgery, University of Birmingham (Birmingham, United Kingdom)  
26  
27

28 James Hayden, MD, PhD, FACS  
29 Department of Orthopaedics & Rehabilitation, Oregon Health & Science University (Portland,  
30 Oregon, USA)  
31  
32

33 Arlene Manherz  
34 (Community)  
35  
36

37 Karim Masrouha, MD  
38 Department of Surgery, McMaster University (Hamilton, Ontario, Canada)  
39  
40

41 Paula McKay, BSc  
42 Department of Surgery, McMaster University (Hamilton, Ontario, Canada)  
43  
44

45 Benjamin Miller, MD, MS, FACS  
46 Department of Orthopaedics & Rehabilitation, University of Iowa (Iowa City, Iowa, USA)  
47  
48

49 Naveen Parasu, MD, MRCP (UK), MRCR (UK), FRCPC  
50 Department of Radiology, McMaster University (Hamilton, Ontario, Canada)  
51  
52

53 Ajay Puri, MS (Ortho)  
54 Department of Surgical Oncology, Tata Memorial Centre (Mumbai, India)  
55  
56

57 R. Lor Randall, MD, FACS  
58  
59  
60

1  
2  
3 Department of Orthopaedic Surgery, University of California, Davis (Sacramento, California,  
4 USA)  
5

6  
7 Patricia Schneider, BSc  
8 Department of Surgery, McMaster University (Hamilton, Ontario, Canada)  
9

10  
11 Sheila Sprague, PhD  
12 Department of Surgery, McMaster University (Hamilton, Ontario, Canada)  
13

14  
15 Nina Szpakowski, MSc, DVM  
16 (Community)  
17

18  
19 Lehana Thabane, PhD  
20 Department of Health Research Methods, Evidence and Impact, McMaster University  
21 (Hamilton, Ontario, Canada)  
22

23  
24 Robert Turcotte, MD, FRCSC  
25 Department of Surgery, McGill University (Montreal, Quebec, Canada)  
26

27  
28 Roberto Vélez, MD, PhD  
29 Department of Orthopaedic Surgery, Hospital Vall d'Hebron (Barcelona, Catalunya, Spain)  
30

31  
32 David Wilson, MD, MSc  
33 Department of Surgery, McMaster University (Hamilton, Ontario, Canada)  
34

35  
36 Kevin Zbuk, MD, FRCPC  
37 Department of Oncology, McMaster University (Hamilton, Ontario, Canada)  
38

39  
40 Gordon Guyatt, MD, FRCPC  
41 Department of Medicine & Department of Health Research Methods, Evidence and Impact,  
42 McMaster University (Hamilton, Ontario, Canada)  
43  
44  
45  
46  
47  
48  
49  
50  
51  
52  
53  
54  
55  
56  
57  
58  
59  
60

## Abstract

**Introduction** Following the treatment of patients with soft tissue sarcomas (STS) that are not metastatic at presentation, the high risk for local and systemic disease recurrence necessitates post-treatment surveillance. Systemic recurrence is most often detected in the lungs. The most appropriate surveillance frequency and modality remain unknown and, as such, clinical practice is highly varied. We plan to assess the feasibility of conducting a multi-centre randomised controlled trial (RCT) that will evaluate the effect on overall five-year survival of two different surveillance frequencies and imaging modalities in patients with STS who undergo surgical excision with curative intent.

**Methods and analysis** The SAFETY trial will be a multi-centre 2X2 factorial randomized controlled trial. Patients with non-metastatic primary Grade II or III STS treated with excision will be allocated to one of four treatment arms: (1) chest radiograph (CXR) every three months for two years; (2) CXR every six months for two years; (3) chest computed tomography (CT) every three months for two years; or (4) chest CT every six months for two years. The primary outcome of the pilot phase is the feasibility of a definitive RCT based on a composite of feasibility endpoints. Secondary outcomes for the feasibility study include the primary outcome of the definitive trial (overall five-year survival), patient-reported outcomes on anxiety, satisfaction and quality of life, local recurrence-free survival, metastasis-free survival, treatment-related complications, and net healthcare costs related to surveillance.

**Ethics and dissemination** This trial received *Pro Tempore* ethics approval from the McMaster / Hamilton Health Sciences Research Ethics Board. Final ethics approval will be obtained prior to commencing patient recruitment. Once feasibility has been established and the definitive protocol is finalized, the study will transition to the definitive phase.

## Article summary

### Article focus

Surveillance After Extremity Tumour surgery (SAFETY) is a pragmatic 2x2 factorial international multi-centre randomised controlled trial that aims to understand the impact of surveillance frequency and imaging on overall 5-year survival in patients with soft tissue sarcomas who underwent surgical resection. A pilot study assessing the feasibility of the definitive phase will be undertaken first.

### Strengths and limitations of this study

- The SAFETY trial will be an international multi-centre 2X2 factorial randomized controlled trial
- The trial will answer a high priority question for sarcoma surgeons
- The SAFETY trial will build on the international collaboration and experience of the PARITY trial
- The feasibility pilot study is essential before undertaking this large multi-centre trial
- The success of the pilot study is dependent on the ability of clinical sites to recruit patients, comply with the protocol, and complete high quality follow-up data

**Keywords:** surveillance; soft tissue sarcoma; study protocol; randomized controlled trial; pilot study

### Background

*Magnitude of the problem*

1  
2  
3 Sarcomas are malignancies of connective tissue that most commonly occur in the extremities.  
4  
5 Sarcomas can arise within bone (bone sarcoma) or soft-tissue (soft-tissue sarcoma [STS]).  
6  
7  
8 Chemotherapy is not curative for the vast majority of patients with STS(1); therefore, surgery is  
9  
10 the standard treatment for STS, with radiation considered important for local disease control.  
11

12       Following treatment for a STS that is not metastatic at presentation, the risk for local and  
13  
14 systemic disease recurrence necessitates careful post-operative surveillance. Between 40% and  
15  
16 50% of all sarcoma patients will develop a local or distant recurrence; however, the risk of  
17  
18 recurrence is greatest in the first few years, with 68% occurring by two years and 90% by five  
19  
20 years(2-4). Metastasis to the lung is the most frequent single location of disease recurrence in  
21  
22 sarcoma patients, occurring in the majority of patients with metastases(4-7). Therefore, routine  
23  
24 follow-up after completing sarcoma treatment is standard practice in the first five years after  
25  
26 surgery. These visits typically include a clinical history, physical examination, and imaging of the  
27  
28 lungs (chest radiograph [CXR], or computed tomography [CT] scan of the lungs).  
29  
30  
31

32  
33       Surveillance strategies for long-term follow-up of sarcoma patients have not been well  
34  
35 researched and current guidelines are based on expert opinion, not on high quality evidence(8, 9).  
36  
37 As such, current clinical practice is highly varied, with survey data of musculoskeletal oncologists  
38  
39 showing that the number of clinic visits ranges from two to 12, the number of CXRs obtained  
40  
41 ranges from zero to 13, and the number of CT scans ranges from one to eight in the first year of  
42  
43 surveillance(10-12).  
44  
45  
46  
47  
48

#### 49 *Best evidence for surveillance strategies*

50  
51 In order to assess the available evidence, we completed a systematic review of the available  
52  
53 randomized controlled trial (RCT) evidence for surveillance in sarcoma management(13). A single  
54  
55  
56  
57  
58  
59  
60



1  
2  
3 study (published separately with early and longer-term follow-up) was identified(14, 15). The  
4 authors of this single-centre study found that three-year overall and disease-free survival was not  
5 worse in sarcoma patients who had less intensive surveillance (CXR) than those with more  
6 intensive surveillance (CT scans)(14). Due to the sample size, this trial could not conclusively  
7 demonstrate non-inferiority in overall or disease-free survival for a six-monthly interval of follow-  
8 up visits against three-monthly interval (both were 64% and 69%, respectively)(14).  
9

10  
11  
12 A follow-up study on the same patient cohort with five-year survival outcomes confirmed  
13 that more frequent follow-up did not improve survival and that, although CT scans detected  
14 pulmonary metastasis earlier, they did not lead to better survival compared with CXRs(15).  
15 However, this was a single-centre study with relatively small numbers and, therefore, confidence  
16 in the results and generalizability of the data to other centres is limited. In addition, a relatively  
17 small proportion of screened patients (42%) that were eligible for the trial were included due to  
18 the exclusion of patients unlikely to follow-up, thus possibly introducing selection bias(14).  
19 Furthermore, low-grade sarcomas were eligible and included in this study, even though they have  
20 little metastatic potential and tumour-related mortality; their inclusion may have diminished the  
21 magnitude of the effects of the interventions(14). Finally, the majority of the included patients  
22 were bone sarcoma patients, thereby limiting the interpretation to STS patients(14).  
23  
24  
25  
26  
27  
28  
29  
30  
31  
32  
33  
34  
35  
36  
37  
38  
39  
40  
41  
42  
43

#### 44 *Risks and benefits of intensive surveillance*

45  
46 Regular, intensive surveillance is more likely to identify recurrent disease earlier than would less  
47 intensive surveillance. This type of surveillance may provide reassurance to patients and clinicians;  
48 however, the adverse effects of intensive surveillance practices are also noteworthy. The costs that  
49 healthcare systems incur as a result of sarcoma surveillance are substantial and could be in excess  
50  
51  
52  
53  
54  
55  
56  
57  
58  
59  
60

1  
2  
3 of USD \$20,000 for high-grade sarcomas(16). Furthermore, intensive surveillance can threaten the  
4 financial security of patients, due in part to the direct (including travel, accommodation, personal  
5 care, and homemaking) and indirect costs (including lost wages for patients and their caregivers)  
6 incurred as a result of follow-up appointments(17). As a result, patients' health and quality of life  
7 can be dramatically impacted(17-19).

8  
9  
10  
11  
12  
13  
14  
15 Secondary investigations and earlier knowledge of disease recurrence can also induce  
16 anxiety and impact the psychosocial wellbeing for those whose mortality risk cannot be  
17 significantly reduced by further medical interventions(20). Overcrowded clinics and long wait  
18 times may constitute other important factors that affect patients' psychosocial wellbeing(21).  
19 Finally, the use of CT has raised concerns over unnecessary radiation exposure compared to  
20 radiographs, although lower dose CT scans may mitigate some of these concerns(22).

### 21 22 23 24 25 26 27 28 29 30 31 *Surveillance research as a priority in orthopaedic oncology*

32  
33 We recently published a modified Delphi study in which we aimed to identify a clinically relevant  
34 consensus-based research agenda in the sarcoma field(23). From this Delphi process that included  
35 80 orthopaedic oncologists and patient representation (with participation from 18 countries), we  
36 identified critical research priorities in the field of orthopaedic oncology and determined the top  
37 four feasible and important research questions that will directly inform patient care and enhance  
38 clinical practice. This study identified the evaluation of post-operative surveillance strategies as  
39 the highest-ranking research priority in the sarcoma field(23).

### 40 41 42 43 44 45 46 47 48 49 50 51 **Study design**

1  
2  
3 We plan to assess the feasibility of conducting the pragmatic international multi-centre 2X2  
4 factorial Surveillance AftEr Extremity Tumour surgerY (SAFETY) RCT that answers the  
5 following question: In extremity STS patients who undergo surgical resection with curative intent,  
6 what is the impact of surveillance frequency (every three vs. every six months) and surveillance  
7 imaging modality (CXR vs. CT scan) on overall survival at five years? To assess feasibility, we  
8 will conduct a pilot study. Study participants will be randomized to one of four possible treatment  
9 arms (see Study Interventions below). Randomization will occur at the end of active treatment  
10 (surgery ± systemic treatment ± local radiation). Following the two-year intervention phase, study  
11 participants will continue to be assessed at regular intervals for an additional three years. Details  
12 of the flow of each study arm are outlined in Figure 1. We anticipate the duration of the pilot phase  
13 to be three years in order to collect intervention phase data on all participants and preliminary post-  
14 intervention phase data. The primary outcome of the pilot phase is the feasibility of a definitive  
15 RCT based on a composite of feasibility endpoints.  
16  
17  
18  
19  
20  
21  
22  
23  
24  
25  
26  
27  
28  
29  
30  
31  
32  
33

## 34 **Objectives**

### 35 *Primary Feasibility Research Objectives*

36  
37 The primary objective of the pilot study will be to determine whether it is feasible to conduct a  
38 large multi-centre RCT that will evaluate the impact of surveillance strategies on patient survival  
39 following extremity STS surgery. To do so, we will assess our ability to:  
40  
41  
42  
43  
44

- 45 A) Recruit patients across multiple participating clinical sites;
- 46 B) Ensure compliance with the study protocol, including the application of eligibility criteria,  
47 timing of intervention phase and post-intervention phase visits and imaging modality;
- 48 C) Maintain completeness of follow-up data;
- 49 D) Maintain completeness of cost analysis data; and  
50  
51  
52  
53  
54  
55  
56  
57  
58  
59  
60

1  
2  
3 E) Maintain data quality.  
4  
5  
6  
7

### 8 *Secondary Feasibility Research Objectives*

9

10 The secondary objectives of the pilot study will include assessing the impact of either surveillance  
11 frequency (every three vs. every six months) or imaging modality (CXR vs. CT scan) on:  
12  
13

14 A) Overall five-year survival;  
15

16 B) Patient anxiety, satisfaction and quality of life;  
17

18 C) Local recurrence-free survival and metastasis-free survival;  
19

20 D) Treatment-related complications; and  
21

22 E) Net direct healthcare costs and net costs of treatment and treatment-related complications once  
23  
24  
25  
26  
27  
28  
29  
30  
31  
32  
33  
34  
35  
36  
37  
38  
39  
40  
41  
42  
43  
44  
45  
46  
47  
48  
49  
50  
51  
52  
53  
54  
55  
56  
57  
58  
59  
60

metastases are detected.

## 31 **Hypothesis**

### 32 *Pilot Study*

33 We hypothesize that the SAFETY trial will be feasible due to: A) its pragmatic design; B) our  
34  
35  
36  
37  
38  
39  
40  
41  
42  
43  
44  
45  
46  
47  
48  
49  
50  
51  
52  
53  
54  
55  
56  
57  
58  
59  
60

established international collaborative research network; C) our qualified, multi-disciplinary study team; D) our existing trial infrastructure; and E) the priority of the study question.

### 44 *Definitive Study*

45 We hypothesize that more frequent post-operative surveillance (compared to less frequent post-  
46  
47  
48  
49  
50  
51  
52  
53  
54  
55  
56  
57  
58  
59  
60

operative surveillance) and the use of post-operative CT scans (compared to CXR) in the first two years following the surgical excision of a STS will improve survival over five years.

## Study setting

This study will be coordinated by the Methods Centre within the Centre for Evidence-Based Orthopaedics (CEO) at McMaster University (Hamilton, ON, Canada). For the pilot phase, we expect that patients will be enrolled from ten clinical sites across four continents. Clinical sites will be carefully screened prior to participation in the study. The clinical site inclusion criteria are: I) adequate research personnel and infrastructure to manage the study; II) sufficiently high extremity STS volume to complete enrollment within the study timeline (defined as greater than or equal to ( $\geq$ ) 20 patients per year); III) commitment from all or most orthopaedic oncologists to participate in the trial; and IV) access to the two imaging modalities. The exclusion criteria are: I) a lack of interest in the trial; II) anticipated challenges with protocol compliance; III) conflicting studies, in the judgment of the Principal Investigator, that would inhibit patient participation; and IV) financial or contract constraints.

## Patient eligibility criteria

### *Inclusion criteria*

Patients who meet all of the following criteria will be included:

- 1) Age of 18 years or older;
- 2) Diagnosed with a primary extremity grade II or III STS;
- 3) Undergone surgical resection of the tumour with curative intent and grossly negative margins;
- 4) Completed neoadjuvant or adjuvant radiation and / or chemotherapy, if applicable;
- 5) The tumour size is greater than or equal to ( $\geq$ ) five centimeters according to the pathology report or pre-treatment MRI if neoadjuvant radiation and / or chemotherapy are given; and
- 6) Provision of informed consent.

1  
2  
3  
4  
5  
6 *Exclusion criteria*

7  
8 Patients who meet any of the following criteria will be excluded:

- 9  
10 1) Metastatic disease at initial presentation based on thoracic imaging (a second CT scan may be  
11 required to confirm that indeterminate nodules are false positives before the patient can be  
12 enrolled provided that the second CT scan shows no evidence of metastatic disease);  
13  
14 2) Undergone surgical excision of a local recurrence;  
15  
16 3) Diagnosis of one of the special sub-types: myxoid / round cell liposarcoma or extra-skeletal  
17 Ewing's sarcoma (These sarcomas have different metastatic patterns, which necessitate  
18 different surveillance protocols);  
19  
20 4) Previous diagnosis of a genetic syndrome with an elevated risk of malignancy, such as Li-  
21 Fraumeni Syndrome (such individuals appear to be at an elevated risk for radiation-induced  
22 cancers, so the use of CT scans should be limited);  
23  
24 5) Previous diagnosis with a co-morbid condition that has a life expectancy of less than one year;  
25  
26 6) The site-specific surveillance protocol for the patient's disease is not compatible with the study  
27 protocol (i.e., regular planned whole-body imaging with positron emission tomography [PET]  
28 scans);  
29  
30 7) Diagnosed with another malignancy within the past five years;  
31  
32 8) Likely problems, in the judgment of the investigator, with maintaining follow-up; and  
33  
34 9) Currently enrolled in a study that does not permit co-enrollment.  
35  
36  
37  
38  
39  
40  
41  
42  
43  
44  
45  
46  
47  
48  
49  
50  
51  
52  
53  
54  
55  
56  
57  
58  
59  
60

### **Recruitment and screening**

Each participating clinical site will have a locally responsible investigator who will oversee the local administration of the trial, screen STS patients for eligibility, and develop a site-specific patient enrollment plan. A Screening Form will be completed for all STS patients aged 18 years or older, irrespective of whether they are eligible to participate in the study or not. Patients will become eligible, will be screened and consented during the first clinic visit at which all treatment is complete, the surgical wound has healed, and the plan for post-treatment surveillance is discussed with the patient. The process of obtaining and documenting informed consent will be completed in accordance with local Good Clinical Practice recommendations. Consent procedures will comply with the appropriate ethics committee and the Health Insurance Portability and Accountability Act (where applicable).

### **Randomization and allocation of patients to study groups**

A centralized and automated internet-based randomisation system using random variable block sizes will assign participants to the study groups. Study personnel at each participating site will complete this task. Randomisation will occur only after eligibility is confirmed and consent to participate has been obtained. Participants will be stratified based on clinical site and peri-operative chemotherapy.

### **Study interventions**

Participants will be randomised to one of four treatment groups:

- 1) CXR every three months for two years;
- 2) CXR every six months for two years;

1  
2  
3 3) Chest CT every three months for two years; or  
4

5 4) Chest CT every six months for two years.  
6  
7

8       Following completion of the intervention phase, participants will continue to be followed  
9  
10 in the study for an additional three years. During this three-year post-intervention phase,  
11  
12 participants will be followed at least every six months as per National Comprehensive Cancer  
13  
14 Network (NCCN) guidelines(24). If possible, thoracic imaging will continue at each scheduled  
15  
16 post-intervention phase visit according to the participants' original allocations.  
17  
18  
19  
20

## 21 **Relapse**

22  
23  
24 Local imaging and clinical assessment of the primary tumour site will be carried out as per the  
25  
26 standard protocol at each participating clinical site. Further diagnostic tests will be performed in  
27  
28 the presence of clinical symptoms or radiologic findings suggestive of disease relapse. Recurrence  
29  
30 will be radiologically or histologically confirmed and classified as local or systemic (metastasis)  
31  
32 recurrence. The first modality suggesting disease relapse in participants with confirmed local or  
33  
34 systemic recurrence will be recorded as responsible for its detection.  
35  
36  
37  
38  
39

## 40 **Outcome measures**

### 41 *Primary outcome*

42  
43  
44 To evaluate feasibility, we will assess the number of patients screened and recruited at each  
45  
46 participating clinical site, participant retention, and maintenance of data quality. In addition, we  
47  
48 will evaluate the utilization of an internet-based centralized randomisation system focusing on the  
49  
50 accuracy of data entry, appropriate stratification of participants and the minimization of  
51  
52 randomisation errors. Finally, we will evaluate investigator and participant compliance with the  
53  
54  
55  
56  
57  
58  
59  
60



1  
2  
3 study protocol, including the application of eligibility criteria, compliance with the surveillance  
4  
5 imaging and frequency regimens, frequency of crossover and timing of post-intervention phase  
6  
7 visits. The a priori criteria for the success of the pilot phase are listed below.  
8  
9

10  
11  
12 *Recruitment Measure:* We will consider our recruitment strategy feasible if we are able to enroll  
13  
14 the pilot sample of 195 patients (approximately 20 patients from each clinical site participating in  
15  
16 the pilot phase) within two years. See sample size determination below.  
17  
18

19  
20  
21 *Protocol Adherence Measure:* During the pilot phase of the PARITY trial, we were able to  
22  
23 maintain an overall protocol adherence rate in excess of 90%(25). Recent reports prepared for the  
24  
25 PARITY Data and Safety Monitoring Board (DSMB) indicate a similar protocol adherence rate.  
26  
27 However, given the greater complexity and longer duration of the SAFETY trial interventions, we  
28  
29 will consider our protocol adherence strategies feasible if there is adherence of 85% or greater to  
30  
31 the visit windows and imaging modality prescribed by the protocol.  
32  
33  
34  
35

36  
37 *Participant Retention Measure:* While 20% loss-to-follow-up has traditionally been considered  
38  
39 acceptable in clinical research, evidence from other orthopaedic trials suggests that bias begins to  
40  
41 affect study results at even lower rates of loss-to-follow-up(26). Therefore, we will consider our  
42  
43 participant retention strategies feasible if no more than 15% of participants are lost-to-follow-up.  
44  
45  
46  
47

48  
49 *Maintenance of Data Quality Measure:* We obtained a data completeness rate of approximately  
50  
51 90% in the PARITY trial pilot phase(25). Therefore, we will consider our data quality strategies  
52  
53 feasible if we are able to maintain 95% or greater completeness of participant follow-up data for  
54  
55  
56  
57  
58  
59

1  
2  
3 the definitive primary outcome. We will also consider our data quality strategies feasible if we are  
4  
5 able to maintain 85% or greater completeness of participant follow-up data for the secondary  
6  
7 outcomes.  
8  
9

### 10 11 12 *Secondary outcomes*

13  
14 The main secondary outcome for the feasibility study will be the primary outcome of the definitive  
15  
16 trial, which is overall five-year survival. The outcome measure will be death from any cause. Data  
17  
18 on secondary outcomes for the definitive trial, which are listed below, will also be collected.  
19  
20  
21  
22

23  
24 *Patient-reported outcome measures:* The validated Patient-Reported Outcomes Measurement  
25  
26 Information System (PROMIS)<sup>®</sup> Cancer-Anxiety questionnaire, PROMIS<sup>®</sup> Satisfaction with  
27  
28 Social Roles and Activities questionnaire, and the EuroQol-5 Dimension (EQ-5D) will be used to  
29  
30 assess patient anxiety, satisfaction and quality of life, respectively. These questionnaires will be  
31  
32 administered at the baseline visit, as well as the 6-month, 12-month, 18-month and 24-month  
33  
34 intervention phase, as well as 36-month, 48-month and 60-month post-intervention phase visits.  
35  
36  
37  
38  
39

40  
41 *Local recurrence-free survival (LRFS) outcome measure:* LRFS will be defined as the length of  
42  
43 time from randomization that the participant survives with no detection of recurrent disease at the  
44  
45 initial tumor site or operative field.  
46  
47  
48

49  
50 *Metastasis-free survival (MFS) outcome measure:* MFS will be defined as the length of time from  
51  
52 randomization that the participant survives with no detection of systemic disease recurrence at any  
53  
54 anatomic location.  
55  
56  
57  
58  
59  
60

1  
2  
3  
4  
5  
6 *Treatment-related complications outcome measures:* Treatment-related complications will include  
7  
8 both chemotherapy-related complications, such as febrile neutropenia, fungal infections or sepsis,  
9  
10 and thoracotomy-related complications, such as pneumothorax, or surgical site infections.  
11  
12

13  
14  
15 *Net healthcare costs outcome measures:* We will perform an incremental cost analysis of net costs  
16  
17 of surveillance and costs incurred from metastasis treatment and metastasis treatment related  
18  
19 complications. Unit costs for all resources used by trial participants will be obtained from regional  
20  
21 statistics and from centers participating in the trial. These unit costs will be combined with the  
22  
23 resource volumes to obtain a net cost per participant over their time in the trial.  
24  
25  
26  
27

## 28 **Protecting against sources of bias**

### 29 *Adjudication of outcomes*

30  
31  
32  
33 An independent Central Adjudication Committee (CAC) will review all situations where eligibility  
34  
35 is in doubt, as well as all reported instances of disease relapse, treatment-related complications,  
36  
37 and death to determine whether a study event has occurred. The SAFETY CAC will be comprised  
38  
39 of two orthopaedic oncologists, one medical oncologist, and one radiologist. All participating  
40  
41 clinical sites will submit digital imaging and relevant hospital records to the Methods Centre via a  
42  
43 web-based platform for events that require adjudication.  
44  
45  
46  
47  
48

### 49 *Blinding*

1  
2  
3 The local clinical team, site study personnel and participants cannot be blinded to the treatment  
4 allocation. The CAC will be blinded to surveillance frequency. The data analysts will, however,  
5 remain blinded during the trial's analysis.  
6  
7  
8  
9

### 10 11 12 *Maximization of follow-up* 13

14 We anticipate only minimal losses to follow-up in our musculoskeletal oncology population.  
15  
16 Nonetheless, the following procedures will be implemented to minimize losses:  
17

- 18  
19 ▪ Individuals likely to present problems with compliance to the study protocol or maintaining  
20 follow-up will be excluded;  
21  
22
- 23 ▪ At the time of randomization, participants will be asked to provide their contact information,  
24 as well as the contact information of their family physician and three alternate contacts;  
25  
26
- 27 ▪ Participants who refuse to return for a study assessment will be asked if they are willing to  
28 provide follow-up data via telephone;  
29  
30
- 31 ▪ If a participant cannot be reached, their status regarding the primary study outcome will be  
32 assessed by reviewing their medical records;  
33  
34
- 35 ▪ Study personnel will remind participants of upcoming clinic visits;  
36  
37
- 38 ▪ To assuage possible concerns related to less frequent follow-up, participants will be encouraged  
39 to schedule an ad hoc visit anytime they are concerned, even if it breaks the surveillance  
40 protocol to which they were assigned;  
41  
42
- 43 ▪ Participants will be provided with access to educational content, such as a video that  
44 demonstrates how to self-examine for a local recurrence of their STS; and  
45  
46
- 47 ▪ Parking and travel vouchers will be provided to participants, where possible, to alleviate the  
48 costs associated with the study.  
49  
50  
51  
52  
53  
54  
55  
56  
57  
58  
59  
60

### *Minimization of crossovers of surveillance interventions*

Crossovers are unlikely for either surveillance intervention as investigators will be requesting the imaging modality during surveillance visits. Any deviation with regards to frequency or imaging modality will be documented. In the event of disease recurrence or progression, the following standardized management protocols will be adopted:

- Local Recurrence: the participant will have a lung CT scan to confirm no progression of their systemic disease before continuing with the study protocol.
- Metastases: the participant will no longer be followed as per the study protocol, but per the appropriate follow-up for the interventions required for the treatment of metastases; however, the participant will continue to be followed in the trial.

For both events, the specific imaging modality used to detect either the local recurrence or the metastases will be documented.

## **Sample size determination**

### *Feasibility Sample Size*

The confidence interval approach was used to calculate the required sample size for the pilot study(27). We determined *a priori* that the definitive trial would only be feasible if our protocol adherence rate was at least 85%. Using a 95% confidence level and a 5% margin of error, we calculated a required sample size of 195 patients.

### *Definitive Sample Size*

Our best estimate of the control group overall five-year survival for both the surveillance frequency and imaging modality is 55%(15). A 10% absolute increase in overall five-year survival associated with both more frequent surveillance and the use of CT scans represents a clinically important difference, as outlined by the American Society of Clinical Oncology's statement on clinically meaningful outcomes in cancer trials(28). Therefore, the definitive trial will be powered to detect an absolute difference of 10% in overall five-year survival.

With a desired power of 0.80, 396 participants per study arm. We will account for a 5% loss to follow-up and, therefore, the final sample size will be 830 participants. **Table 1** shows various sample sizes for pairwise comparisons of alternative surveillance frequencies / imaging modalities given varying control event rates and absolute increases in survival.

The definitive sample size calculation may be adjusted as we prepare for the transition from the feasibility to the definitive phase as a result of data collected during the pilot study.

**Table 1.** Sample Size Per Group for 80% power,  $\alpha=0.05$ . Event rate = death

|                                                 |     | Event Rate in More Intensive Surveillance Group |      |      |      |
|-------------------------------------------------|-----|-------------------------------------------------|------|------|------|
|                                                 |     | 25%                                             | 30%  | 35%  | 40%  |
| Event Rate in Less Intensive Surveillance Group | 35% | 696                                             | 2832 | -    | -    |
|                                                 | 40% | 332                                             | 752  | 3020 | -    |
|                                                 | 45% | 196                                             | 352  | 792  | 3148 |
|                                                 | 50% | 132                                             | 204  | 368  | 816  |
|                                                 | 55% | 96                                              | 136  | 212  | 372  |

## Analysis plan overview

The analysis and reporting of the trial will follow the CONSORT criteria. The primary analysis will compare the treatment groups on the overall 5-year survival. Two independent comparisons between treatment groups will be made using Cox regression models with time to the definitive primary endpoint. Results will be expressed as effect (ORs for binary outcomes, HRs for time-dependent outcomes and mean difference for continuous outcomes), corresponding 2-sided 95% CIs and associated p-values.

## Analysis of feasibility outcomes

A full description of the measures, variables, and methods of analysis are shown in **Table 2**. We will record the total number of participants enrolled on a monthly basis. Each participating site will keep a Screening Log of included and excluded patients. We will also keep a record of participants who miss visits, and those who are withdrawn or lost to follow-up. These will be reported using descriptive statistics – reported as counts (percent) for categorical variables and mean (standard deviation) for continuous variables with 95% confidence intervals. We will report the proportion of complete CRFs as descriptive data.

**Table 2.** Summary of Feasibility Outcomes Analysis Plan

| Objective                                                                            | Outcome                             | Criteria for success of feasibility                                                                                                      | Method of analysis                                                                                                                                  |
|--------------------------------------------------------------------------------------|-------------------------------------|------------------------------------------------------------------------------------------------------------------------------------------|-----------------------------------------------------------------------------------------------------------------------------------------------------|
| To determine the feasibility of conducting the multi-centre SAFETY international RCT | Recruitment Measure                 | Enrollment of pilot sample within two years                                                                                              | Descriptive statistics – reported as counts (percent) for categorical variables and means (standard deviation) for continuous variables with 95% CI |
|                                                                                      | Protocol Adherence Measure          | Protocol adherence of 85% or greater                                                                                                     |                                                                                                                                                     |
|                                                                                      | Participant Retention Measure       | Loss-to-participant follow-up of 15% or less                                                                                             |                                                                                                                                                     |
|                                                                                      | Maintenance of Data Quality Measure | Data completeness of 95% or greater for the definitive primary outcome<br>Data completeness of 85% or greater for the secondary outcomes |                                                                                                                                                     |

### Ethical considerations

This study is to be conducted according to international standards of Good Clinical Practice, applicable government regulations, and institutional research policies and procedures. All study



1  
2  
3 intervention phase (surveillance) arms fall within the spectrum of current standard practice, as do  
4  
5 the standardized post-intervention phase follow-up visits. This trial has received *Pro Tempore*  
6  
7 ethics approval from the McMaster / Hamilton Health Sciences Research Ethics Board on August  
8  
9 23<sup>rd</sup>, 2018. The study protocol will be submitted to a properly constituted independent ethics  
10  
11 committee, in agreement with local legal prescriptions, for formal approval of the study conduct  
12  
13 at each participating clinical site. A copy of this approval will be provided to the Methods Centre  
14  
15 by each participating clinical site prior to the local commencement of the study.  
16  
17  
18  
19  
20  
21

## 22 **Study Timeline**

23  
24 We expect that the pilot study will take just over three years to complete. We estimate that  
25  
26 recruitment will take approximately one year to complete per site. The initiation of screening and  
27  
28 enrollment will likely be staggered across the participating clinical sites due to the variability in  
29  
30 the time required to obtain ethics approval and negotiate institutional contracts. We expect a further  
31  
32 two years for all pilot participants to complete the intervention phase of the trial. Although we will  
33  
34 not have complete post-intervention phase data for any pilot participants, we anticipate being able  
35  
36 to determine feasibility at the end of the intervention phase based on our feasibility objectives. We  
37  
38 plan *a priori* to transition directly from the pilot phase to the definitive phase if feasibility is  
39  
40 established.  
41  
42  
43  
44  
45  
46

## 47 **Data Safety Monitoring Board**

48  
49 As per the principles established by the *Data Monitoring Committees: Lessons, Ethics, Statistics*  
50  
51 (*DAMOCLES*) *Study Group* charter, a DSMB will oversee the safety of the trial participants and  
52  
53 the overall conduct of the trial. The Committee members will be independent of the trial, free of  
54  
55  
56  
57  
58  
59  
60

1  
2  
3 conflicts with any of the investigative team, and will consist of two orthopaedic oncologists, a  
4 medical oncologist, a radiologist, and a biostatistician. The DSMB will frequently review  
5 enrollment and demographic summaries, listings of protocol deviations, and summaries and  
6 listings of serious adverse events. They will advise the Principal Investigator and SAFETY study  
7 team on any concerns related to participant safety and trial conduct and will make  
8 recommendations for: A) study continuation as designed; B) study termination; C) study  
9 continuation with major or minor modifications; or D) temporary study suspension of enrollment  
10 until some uncertainty is resolved.  
11  
12  
13  
14  
15  
16  
17  
18  
19  
20  
21  
22  
23

### 24 **Potential impact of the study**

25  
26 The benefit of this pilot study would be to determine the feasibility of the SAFETY trial. This is  
27 essential prior to undertaking a large multi-centre RCT. Experience gained during the pilot phase  
28 will provide insight into methods to increase enrollment, strategies to maintain protocol adherence  
29 and the adjustment of recruitment expectations. In addition, the ultimate success of the pilot phase  
30 will support funding requests for the definitive phase of the multi-centre SAFETY trial.  
31  
32  
33  
34  
35  
36  
37

38 Once the feasibility endpoints are reached, we will transition directly into and begin  
39 recruiting for the definitive SAFETY trial. The ultimate goal of the SAFETY trial is to provide  
40 high-quality evidence for surveillance strategies following the treatment of STS, which will allow  
41 for the development of evidence-based clinical practice guidelines for sarcoma patients worldwide.  
42  
43  
44  
45  
46  
47  
48

### 49 **References**

1. Pervaiz N, Colterjohn N, Farrokhyar F, Tozer R, Figueredo A, Ghert M. A systematic meta-analysis of randomized controlled trials of adjuvant chemotherapy for localized resectable soft-tissue sarcoma. *Cancer*. 2008;113(3):573-81.
2. Whooley BP, Mooney MM, Gibbs JF, Kraybill WG. Effective follow-up strategies in soft tissue sarcoma. *Seminars in surgical oncology*. 1999;17(1):83-7.
3. Whooley BP, Gibbs JF, Mooney MM, McGrath BE, Kraybill WG. Primary extremity sarcoma: what is the appropriate follow-up? *Annals of surgical oncology*. 2000;7(1):9-14.
4. Kane JM, 3rd. Surveillance strategies for patients following surgical resection of soft tissue sarcomas. *Current opinion in oncology*. 2004;16(4):328-32.
5. Gadd MA, Casper ES, Woodruff JM, McCormack PM, Brennan MF. Development and treatment of pulmonary metastases in adult patients with extremity soft tissue sarcoma. *Annals of surgery*. 1993;218(6):705-12.
6. Huth JF, Eilber FR. Patterns of metastatic spread following resection of extremity soft-tissue sarcomas and strategies for treatment. *Seminars in surgical oncology*. 1988;4(1):20-6.
7. Songur N, Dinc M, Ozdilekcan C, Eke S, Ok U, Oz M. Analysis of lung metastases in patients with primary extremity sarcoma. *Sarcoma*. 2003;7(2):63-7.
8. Group ESESNW. Bone sarcomas: ESMO Clinical Practice Guidelines for diagnosis, treatment and follow-up. *Annals of oncology : official journal of the European Society for Medical Oncology*. 2014;25 Suppl 3:iii113-23.
9. Group ESESNW. Soft tissue and visceral sarcomas: ESMO Clinical Practice Guidelines for diagnosis, treatment and follow-up. *Annals of oncology : official journal of the European Society for Medical Oncology*. 2014;25 Suppl 3:iii102-12.
10. Gerrand CH, Billingham LJ, Woll PJ, Grimer RJ. Follow up after Primary Treatment of Soft Tissue Sarcoma: A Survey of Current Practice in the United Kingdom. *Sarcoma*. 2007;2007:34128.
11. Greenberg DD, Crawford B. Surveillance Strategies for Sarcoma: Results of a Survey of Members of the Musculoskeletal Tumor Society. *Sarcoma*. 2016;2016:8289509.
12. Ries Z, Gibbs CP, Jr., Scarborough MT, Miller BJ. Pulmonary Surveillance Strategies Following Sarcoma Excision Vary Among Orthopedic Oncologists: A Survey of the Musculoskeletal Tumor Society. *The Iowa orthopaedic journal*. 2016;36:109-16.
13. Bozzo A GM, Baldawi H, Simchovich G. Optimal surveillance strategies following curative surgery for extremity sarcoma: A systematic review of randomized control trials. *Open Science Framework*. 2018(May).
14. Puri A, Gulia A, Hawaldar R, Ranganathan P, Badwe RA. Does intensity of surveillance affect survival after surgery for sarcomas? Results of a randomized noninferiority trial. *Clinical orthopaedics and related research*. 2014;472(5):1568-75.
15. Puri A, Ranganathan P, Gulia A, Crasto S, Hawaldar R, Badwe RA. Does a less intensive surveillance protocol affect the survival of patients after treatment of a sarcoma

- 1  
2  
3 of the limb? updated results of the randomized TOSS study. *The bone & joint journal*.  
4 2018;100-B(2):262-8.
- 5 16. Goel A, Christy ME, Virgo KS, Kraybill WG, Johnson FE. Costs of follow-up after  
6 potentially curative treatment for extremity soft-tissue sarcoma. *International journal of*  
7 *oncology*. 2004;25(2):429-35.
- 8 17. Longo CJ, Deber R, Fitch M, Williams AP, D'Souza D. An examination of cancer  
9 patients' monthly 'out-of-pocket' costs in Ontario, Canada. *European journal of cancer*  
10 *care*. 2007;16(6):500-7.
- 11 18. Hopkins RB, Goeree R, Longo CJ. Estimating the national wage loss from cancer in  
12 Canada. *Current oncology*. 2010;17(2):40-9.
- 13 19. Nipp RD, Zullig LL, Samsa G, Peppercorn JM, Schrag D, Taylor DH, Jr., et al.  
14 Identifying cancer patients who alter care or lifestyle due to treatment-related financial  
15 distress. *Psycho-oncology*. 2016;25(6):719-25.
- 16 20. Thompson CA, Charlson ME, Schenkein E, Wells MT, Furman RR, Elstrom R, et  
17 al. Surveillance CT scans are a source of anxiety and fear of recurrence in long-term  
18 lymphoma survivors. *Annals of oncology : official journal of the European Society for*  
19 *Medical Oncology*. 2010;21(11):2262-6.
- 20 21. Thomas S, Glynn-Jones R, Chait I. Is it worth the wait? A survey of patients'  
21 satisfaction with an oncology outpatient clinic. *European journal of cancer care*.  
22 1997;6(1):50-8.
- 23 22. Brenner DJ, Hall EJ. Computed tomography--an increasing source of radiation  
24 exposure. *The New England journal of medicine*. 2007;357(22):2277-84.
- 25 23. Schneider PJ, Evaniew N, McKay P, Ghert M. Moving Forward Through  
26 Consensus: A Modified Delphi Approach to Determine the Top Research Priorities in  
27 Orthopaedic Oncology. *Clinical orthopaedics and related research*. 2017;475(12):3044-55.
- 28 24. von Mehren M, Randall RL, Benjamin RS, Boles S, Bui MM, Ganjoo KN, et al. Soft  
29 Tissue Sarcoma, Version 2.2018, NCCN Clinical Practice Guidelines in Oncology. *Journal*  
30 *of the National Comprehensive Cancer Network : JNCCN*. 2018;16(5):536-63.
- 31 25. Investigators P. Prophylactic antibiotic regimens in tumour surgery (PARITY): a  
32 pilot multicentre randomised controlled trial. *Bone & joint research*. 2015;4(9):154-62.
- 33 26. Zelle BA, Bhandari M, Sanchez AI, Probst C, Pape HC. Loss of follow-up in  
34 orthopaedic trauma: is 80% follow-up still acceptable? *Journal of orthopaedic trauma*.  
35 2013;27(3):177-81.
- 36 27. Thabane L, Ma J, Chu R, Cheng J, Ismaila A, Rios LP, et al. A tutorial on pilot  
37 studies: the what, why and how. *BMC medical research methodology*. 2010;10:1.
- 38 28. Ellis LM, Bernstein DS, Voest EE, Berlin JD, Sargent D, Cortazar P, et al.  
39 American Society of Clinical Oncology perspective: Raising the bar for clinical trials by  
40 defining clinically meaningful outcomes. *Journal of clinical oncology : official journal of*  
41 *the American Society of Clinical Oncology*. 2014;32(12):1277-80.
- 42  
43  
44  
45  
46  
47  
48  
49  
50  
51  
52  
53  
54  
55  
56  
57  
58  
59  
60

## Figure legend

Figure 1. Study flow diagram

## Data statement

All data from this work will be maintained in security and confidentiality at the Methods Centre at McMaster University. Access to additional unpublished data will be reviewed on a case-by-case basis and will accord with the guidelines of our local institutional research ethics board.

## Authors' contributions

- Substantial contributions to the conception or design of the work; or the acquisition, analysis, or interpretation of data for the work: All
- Drafting the work: MG, TS, and KM
- Revising it critically for important intellectual content: All
- Final approval of the version to be published: All
- Agreement to be accountable for all aspects of the work in ensuring that questions related to the accuracy or integrity of any part of the work are appropriately investigated and resolved: All

## Funding

This research is supported by funding through the Hamilton Academic Health Science Organization (HAHSO) Innovation Grant.

## Competing interests statement

Dr. Bhandari, Dr. Ghert, Dr. Randall, and Dr. Hayden report personal fees from consultancy and/or royalties outside the submitted work.

## Word count

4,265

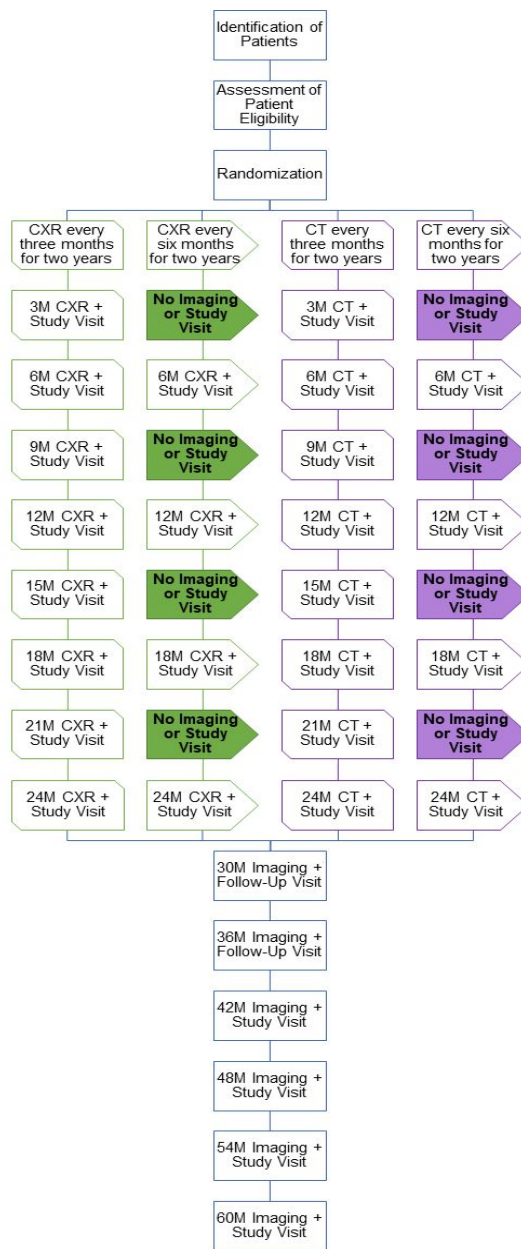

**Figure 1.**

M = month; CXR = chest X-ray; CT = computed tomography

# Reporting checklist for protocol of a clinical trial.

Based on the SPIRIT guidelines.

## Instructions to authors

Complete this checklist by entering the page numbers from your manuscript where readers will find each of the items listed below.

Your article may not currently address all the items on the checklist. Please modify your text to include the missing information. If you are certain that an item does not apply, please write "n/a" and provide a short explanation.

Upload your completed checklist as an extra file when you submit to a journal.

In your methods section, say that you used the SPIRIT reporting guidelines, and cite them as:

Chan A-W, Tetzlaff JM, Altman DG, Laupacis A, Gøtzsche PC, Krleža-Jerić K, Hróbjartsson A, Mann H, Dickersin K, Berlin J, Doré C, Parulekar W, Summerskill W, Groves T, Schulz K, Sox H, Rockhold FW, Rennie D, Moher D. SPIRIT 2013 Statement: Defining standard protocol items for clinical trials. *Ann Intern Med.* 2013;158(3):200-207

Page

Number

Reporting Item

|      |                                                             |   |
|------|-------------------------------------------------------------|---|
| T #  | Descriptive title identifying the study design, population, | 1 |
| it 1 | interventions, and, if applicable, trial acronym            |   |
| l    |                                                             |   |
| e    |                                                             |   |

1 T # Trial identifier and registry name. If not yet registered, N/A  
2  
3 ri 2 name of intended registry  
4 a a  
5 l  
6 r  
7 e  
8 g  
9 is  
10 tr  
11 a  
12 ti  
13 o  
14 n  
15  
16  
17  
18  
19  
20  
21

22 T # All items from the World Health Organization Trial N/A  
23  
24 ri 2 Registration Data Set  
25 a b  
26 l  
27 r  
28 e  
29 g  
30 is  
31 tr  
32 a  
33 ti  
34 o  
35 n  
36 :  
37 d  
38 a  
39 t  
40 a  
41 s  
42 e  
43 t  
44  
45  
46  
47  
48  
49  
50  
51  
52  
53  
54  
55  
56  
57  
58  
59  
60



1 P # Date and version identifier 1  
 2  
 3 r 3  
 4 o  
 5 t  
 6 o  
 7 c  
 8 o  
 9 l  
 10 l  
 11 v  
 12 e  
 13 r  
 14 si  
 15 o  
 16 n

23 F # Sources and types of financial, material, and other support HAHSO  
 24 u 4  
 25 n  
 26 d  
 27 i  
 28 n  
 29 g  
 30  
 31  
 32  
 33  
 34  
 35  
 36  
 37  
 38  
 39  
 40  
 41  
 42  
 43  
 44  
 45  
 46  
 47  
 48  
 49  
 50  
 51  
 52  
 53  
 54  
 55  
 56  
 57  
 58  
 59  
 60

1 R # Names, affiliations, and roles of protocol contributors 2,3,28  
2  
3 o 5  
4 l a  
5  
6 e  
7 s  
8 a  
9 n  
10 d  
11 r  
12 e  
13 s  
14 p  
15 o  
16 n  
17 si  
18 b  
19 il  
20 it  
21 i  
22 e  
23 s:  
24 c  
25 o  
26 n  
27 tr  
28 i  
29 b  
30 u  
31 t  
32 o  
33 r  
34 s  
35 h  
36 i  
37 p  
38  
39  
40  
41  
42  
43  
44  
45  
46  
47  
48  
49  
50  
51  
52  
53  
54  
55  
56  
57  
58  
59  
60

|    |     |                                                    |     |
|----|-----|----------------------------------------------------|-----|
| 1  | R # | Name and contact information for the trial sponsor | N/A |
| 2  |     |                                                    |     |
| 3  | o   | 5                                                  |     |
| 4  | l   | b                                                  |     |
| 5  |     |                                                    |     |
| 6  | e   |                                                    |     |
| 7  | s   |                                                    |     |
| 8  | a   |                                                    |     |
| 9  | n   |                                                    |     |
| 10 | d   |                                                    |     |
| 11 | r   |                                                    |     |
| 12 | e   |                                                    |     |
| 13 | s   |                                                    |     |
| 14 | p   |                                                    |     |
| 15 | o   |                                                    |     |
| 16 | n   |                                                    |     |
| 17 | si  |                                                    |     |
| 18 | b   |                                                    |     |
| 19 | il  |                                                    |     |
| 20 | it  |                                                    |     |
| 21 | i   |                                                    |     |
| 22 | e   |                                                    |     |
| 23 | s:  |                                                    |     |
| 24 | s   |                                                    |     |
| 25 | p   |                                                    |     |
| 26 | o   |                                                    |     |
| 27 | n   |                                                    |     |
| 28 | s   |                                                    |     |
| 29 | o   |                                                    |     |
| 30 | r   |                                                    |     |
| 31 | c   |                                                    |     |
| 32 | o   |                                                    |     |
| 33 | n   |                                                    |     |
| 34 | t   |                                                    |     |
| 35 | a   |                                                    |     |
| 36 | c   |                                                    |     |
| 37 | t   |                                                    |     |
| 38 | i   |                                                    |     |
| 39 | n   |                                                    |     |
| 40 | f   |                                                    |     |
| 41 |     |                                                    |     |
| 42 |     |                                                    |     |
| 43 |     |                                                    |     |
| 44 |     |                                                    |     |
| 45 |     |                                                    |     |
| 46 |     |                                                    |     |
| 47 |     |                                                    |     |
| 48 |     |                                                    |     |
| 49 |     |                                                    |     |
| 50 |     |                                                    |     |
| 51 |     |                                                    |     |
| 52 |     |                                                    |     |
| 53 |     |                                                    |     |
| 54 |     |                                                    |     |
| 55 |     |                                                    |     |
| 56 |     |                                                    |     |
| 57 |     |                                                    |     |
| 58 |     |                                                    |     |
| 59 |     |                                                    |     |
| 60 |     |                                                    |     |

o  
r  
m  
a  
t  
i  
o  
n

1  
2  
3  
4  
5  
6  
7  
8  
9  
10  
11  
12  
13  
14  
15  
16  
17  
18  
19  
20  
21  
22  
23  
24  
25  
26  
27  
28  
29  
30  
31  
32  
33  
34  
35  
36  
37  
38  
39  
40  
41  
42  
43  
44  
45  
46  
47  
48  
49  
50  
51  
52  
53  
54  
55  
56  
57  
58  
59  
60

1 R # Role of study sponsor and funders, if any, in study design; N/A  
2  
3 o 5 collection, management, analysis, and interpretation of  
4 l c data; writing of the report; and the decision to submit the  
5 e report for publication, including whether they will have  
6 s ultimate authority over any of these activities  
7  
8 a  
9  
10 n  
11  
12 d  
13  
14 r  
15 e  
16 s  
17  
18 p  
19 o  
20 n  
21 n  
22 si  
23 b  
24 il  
25 it  
26 i  
27 e  
28 s:  
29 s  
30 p  
31 o  
32 n  
33 s  
34 o  
35 r  
36 a  
37 n  
38 d  
39 f  
40 u  
41 n  
42 d  
43 e  
44 r

1 R # Composition, roles, and responsibilities of the coordinating 18, 24, 25  
2  
3 o 5 centre, steering committee, endpoint adjudication  
4 l d committee, data management team, and other individuals or  
5  
6 e groups overseeing the trial, if applicable (see Item 21a for  
7  
8 s data monitoring committee)  
9  
10 a  
11 n  
12 d  
13 r  
14 e  
15 s  
16  
17 p  
18  
19 o  
20  
21 n  
22 si  
23 b  
24 il  
25 it  
26  
27 i  
28 e  
29  
30 s:  
31  
32 c  
33 o  
34 m  
35 m  
36 it  
37  
38 t  
39 e  
40 e  
41  
42 s

1 B # Description of research question and justification for 6, 7, 8  
2  
3 a 6 undertaking the trial, including summary of relevant studies  
4 c a (published and unpublished) examining benefits and harms  
5 k for each intervention  
6  
7 g  
8  
9 r  
10 o  
11 u  
12 n  
13 d  
14 a  
15 n  
16 d  
17 r  
18 a  
19 ti  
20 o  
21 n  
22 a  
23 l  
24 e  
25  
26  
27  
28  
29  
30  
31  
32  
33  
34  
35  
36  
37  
38  
39  
40  
41  
42  
43  
44  
45  
46  
47  
48  
49  
50  
51  
52  
53  
54  
55  
56  
57  
58  
59  
60

6

1 B # Explanation for choice of comparators

2 a 6

3 c b

4 k

5 g

6 r

7 o

8 u

9 n

10 d

11 a

12 n

13 d

14 r

15 a

16 ti

17 o

18 n

19 a

20 l

21 e

22 :

23 c

24 h

25 o

26 i

27 c

28 e

29 o

30 f

31 c

32 o

33 m

34 p

35 a

36 r

37 a

38 t

39

40



1 O  
2 r  
3  
4 s  
5  
6  
7  
8  
9  
10  
11  
12  
13  
14  
15  
16  
17  
18  
19  
20  
21  
22  
23  
24  
25  
26  
27  
28  
29  
30  
31  
32  
33  
34  
35  
36  
37  
38  
39  
40  
41  
42  
43  
44  
45  
46  
47  
48  
49  
50  
51  
52  
53  
54  
55  
56  
57  
58  
59  
60

|    |     |                                                                   |           |
|----|-----|-------------------------------------------------------------------|-----------|
| 1  | O # | Specific objectives or hypotheses                                 | 9, 10, 11 |
| 2  |     |                                                                   |           |
| 3  | b   | 7                                                                 |           |
| 4  | j   |                                                                   |           |
| 5  | e   |                                                                   |           |
| 6  | c   |                                                                   |           |
| 7  | t   |                                                                   |           |
| 8  | i   |                                                                   |           |
| 9  | v   |                                                                   |           |
| 10 | e   |                                                                   |           |
| 11 | s   |                                                                   |           |
| 12 |     |                                                                   |           |
| 13 |     |                                                                   |           |
| 14 |     |                                                                   |           |
| 15 |     |                                                                   |           |
| 16 | T # | Description of trial design including type of trial (eg,          | 9         |
| 17 |     |                                                                   |           |
| 18 | ri  | 8 parallel group, crossover, factorial, single group), allocation |           |
| 19 | a   | ratio, and framework (eg, superiority, equivalence, non-          |           |
| 20 |     | inferiority, exploratory)                                         |           |
| 21 | l   |                                                                   |           |
| 22 | d   |                                                                   |           |
| 23 | e   |                                                                   |           |
| 24 |     |                                                                   |           |
| 25 | si  |                                                                   |           |
| 26 | g   |                                                                   |           |
| 27 | n   |                                                                   |           |
| 28 |     |                                                                   |           |
| 29 |     |                                                                   |           |
| 30 |     |                                                                   |           |
| 31 | S # | Description of study settings (eg, community clinic,              | 11        |
| 32 |     |                                                                   |           |
| 33 | t   | 9 academic hospital) and list of countries where data will be     |           |
| 34 | u   | collected. Reference to where list of study sites can be          |           |
| 35 |     | obtained                                                          |           |
| 36 | d   |                                                                   |           |
| 37 | y   |                                                                   |           |
| 38 | s   |                                                                   |           |
| 39 | e   |                                                                   |           |
| 40 | tt  |                                                                   |           |
| 41 | i   |                                                                   |           |
| 42 | n   |                                                                   |           |
| 43 | g   |                                                                   |           |
| 44 |     |                                                                   |           |
| 45 |     |                                                                   |           |
| 46 |     |                                                                   |           |
| 47 |     |                                                                   |           |
| 48 |     |                                                                   |           |
| 49 |     |                                                                   |           |
| 50 |     |                                                                   |           |
| 51 |     |                                                                   |           |
| 52 |     |                                                                   |           |
| 53 |     |                                                                   |           |
| 54 |     |                                                                   |           |
| 55 |     |                                                                   |           |
| 56 |     |                                                                   |           |
| 57 |     |                                                                   |           |
| 58 |     |                                                                   |           |
| 59 |     |                                                                   |           |
| 60 |     |                                                                   |           |

12

1 E # Inclusion and exclusion criteria for participants. If  
2  
3 li 1 applicable, eligibility criteria for study centres and  
4 g 0 individuals who will perform the interventions (eg,  
5  
6 i surgeons, psychotherapists)

7 b  
8  
9 il  
10 it  
11  
12 y  
13 c  
14 ri  
15  
16 t  
17  
18 e  
19 ri  
20  
21 a  
22

14

23  
24 I # Interventions for each group with sufficient detail to allow  
25 n 1 replication, including how and when they will be  
26 t 1 administered

28 e a  
29  
30 r  
31 v  
32  
33 e  
34 n  
35  
36 ti  
37 o  
38  
39 n  
40 s:  
41 d  
42  
43 e  
44  
45 s  
46 c  
47 ri  
48  
49 p  
50 ti  
51  
52 o  
53  
54 n  
55  
56  
57  
58  
59  
60

1 I # Criteria for discontinuing or modifying allocated N/A  
2  
3 n 1 interventions for a given trial participant (eg, drug dose  
4 t 1 change in response to harms, participant request, or  
5 e b improving / worsening disease)  
6  
7 r  
8 v  
9  
10 e  
11 n  
12 ti  
13 o  
14 n  
15 s:  
16 m  
17 o  
18 d  
19 if  
20 i  
21 c  
22 a  
23 ti  
24 o  
25 n  
26 s  
27  
28  
29  
30  
31  
32  
33  
34  
35  
36  
37  
38  
39  
40  
41  
42  
43  
44  
45  
46  
47  
48  
49  
50  
51  
52  
53  
54  
55  
56  
57  
58  
59  
60

I # Strategies to improve adherence to intervention protocols,  
n 1 and any procedures for monitoring adherence (eg, drug  
t 1 tablet return; laboratory tests)  
e c  
r  
v  
e  
n  
ti  
o  
n  
s:  
a  
d  
h  
e  
r  
a  
n  
c  
e

1 I # Relevant concomitant care and interventions that are 12, 13  
 2 n 1 permitted or prohibited during the trial  
 3 t 1  
 4 e d  
 5 r  
 6 v  
 7 e  
 8 n  
 9 ti  
 10 o  
 11 n  
 12 s:  
 13 c  
 14 o  
 15 n  
 16 c  
 17 o  
 18 m  
 19 it  
 20 a  
 21 n  
 22 t  
 23 c  
 24 a  
 25 r  
 26 e

41 O # Primary, secondary, and other outcomes, including the See note 1  
 42 u 1 specific measurement variable (eg, systolic blood pressure),  
 43 t 2 analysis metric (eg, change from baseline, final value, time  
 44 c to event), method of aggregation (eg, median, proportion),  
 45 o and time point for each outcome. Explanation of the clinical  
 46 m relevance of chosen efficacy and harm outcomes is strongly  
 47 e recommended  
 48 s

|    |    |   |                                                            |        |
|----|----|---|------------------------------------------------------------|--------|
| 1  | P  | # | Time schedule of enrolment, interventions (including any   | 24     |
| 2  |    |   |                                                            |        |
| 3  | a  | 1 | run-ins and washouts), assessments, and visits for         |        |
| 4  | rt | 3 | participants. A schematic diagram is highly recommended    |        |
| 5  |    |   | (see Figure)                                               |        |
| 6  | i  |   |                                                            |        |
| 7  | c  |   |                                                            |        |
| 8  |    |   |                                                            |        |
| 9  | i  |   |                                                            |        |
| 10 |    |   |                                                            |        |
| 11 | P  |   |                                                            |        |
| 12 | a  |   |                                                            |        |
| 13 | n  |   |                                                            |        |
| 14 |    |   |                                                            |        |
| 15 | t  |   |                                                            |        |
| 16 | ti |   |                                                            |        |
| 17 |    |   |                                                            |        |
| 18 | m  |   |                                                            |        |
| 19 | e  |   |                                                            |        |
| 20 | li |   |                                                            |        |
| 21 |    |   |                                                            |        |
| 22 | n  |   |                                                            |        |
| 23 |    |   |                                                            |        |
| 24 | e  |   |                                                            |        |
| 25 |    |   |                                                            |        |
| 26 |    |   |                                                            |        |
| 27 | S  | # | Estimated number of participants needed to achieve study   | 20, 21 |
| 28 | a  | 1 | objectives and how it was determined, including clinical   |        |
| 29 |    |   |                                                            |        |
| 30 | m  | 4 | and statistical assumptions supporting any sample size     |        |
| 31 | p  |   | calculations                                               |        |
| 32 |    |   |                                                            |        |
| 33 | l  |   |                                                            |        |
| 34 | e  |   |                                                            |        |
| 35 |    |   |                                                            |        |
| 36 | si |   |                                                            |        |
| 37 | z  |   |                                                            |        |
| 38 |    |   |                                                            |        |
| 39 | e  |   |                                                            |        |
| 40 |    |   |                                                            |        |
| 41 |    |   |                                                            |        |
| 42 | R  | # | Strategies for achieving adequate participant enrolment to | 13, 14 |
| 43 | e  | 1 | reach target sample size                                   |        |
| 44 |    |   |                                                            |        |
| 45 | c  | 5 |                                                            |        |
| 46 | r  |   |                                                            |        |
| 47 |    |   |                                                            |        |
| 48 | u  |   |                                                            |        |
| 49 | it |   |                                                            |        |
| 50 |    |   |                                                            |        |
| 51 | m  |   |                                                            |        |
| 52 | e  |   |                                                            |        |
| 53 |    |   |                                                            |        |
| 54 | n  |   |                                                            |        |
| 55 | t  |   |                                                            |        |
| 56 |    |   |                                                            |        |
| 57 |    |   |                                                            |        |
| 58 |    |   |                                                            |        |
| 59 |    |   |                                                            |        |
| 60 |    |   |                                                            |        |

1 A # Method of generating the allocation sequence (eg,  
2 ll 1 computer-generated random numbers), and list of any  
3 o 6 factors for stratification. To reduce predictability of a  
4 c a random sequence, details of any planned restriction (eg,  
5 a blocking) should be provided in a separate document that is  
6 ti unavailable to those who enrol participants or assign  
7 o interventions  
8  
9  
10  
11  
12  
13  
14  
15  
16  
17  
18  
19  
20  
21  
22  
23  
24  
25  
26  
27  
28  
29  
30  
31  
32  
33  
34  
35  
36  
37  
38  
39  
40  
41  
42  
43  
44  
45  
46  
47  
48  
49  
50  
51  
52  
53  
54  
55  
56  
57  
58  
59  
60



1 A # Mechanism of implementing the allocation sequence (eg,  
2 ll 1 central telephone; sequentially numbered, opaque, sealed  
3 o 6 envelopes), describing any steps to conceal the sequence  
4 c b until interventions are assigned  
5  
6 a  
7 ti  
8 o  
9 n  
10 c  
11 o  
12 n  
13 c  
14 o  
15 n  
16 c  
17 e  
18 a  
19 l  
20 m  
21 e  
22 n  
23 t  
24 m  
25 e  
26 c  
27 h  
28 a  
29 n  
30 is  
31 m

1 A # Who will generate the allocation sequence, who will enrol 14  
2 ll 1 participants, and who will assign participants to  
3 o 6 interventions

4 c c  
5  
6 a  
7 ti  
8 o  
9 n  
10 .  
11 i  
12 m  
13 p  
14 l  
15 e  
16 m  
17 e  
18 n  
19 t  
20 a  
21 ti  
22 o  
23 n

35 B # Who will be blinded after assignment to interventions (eg, 19  
36 li 1 trial participants, care providers, outcome assessors, data  
37 n 7 analysts), and how

40 d a  
41 i  
42 n  
43 g  
44 (  
45 m  
46 a  
47 s  
48 k  
49 i  
50 n

1 g  
2 )  
3  
4  
5  
6  
7  
8  
9  
10  
11  
12  
13  
14  
15  
16  
17  
18  
19  
20  
21  
22  
23  
24  
25  
26  
27  
28  
29  
30  
31  
32  
33  
34  
35  
36  
37  
38  
39  
40  
41  
42  
43  
44  
45  
46  
47  
48  
49  
50  
51  
52  
53  
54  
55  
56  
57  
58  
59  
60

1 B # If blinded, circumstances under which unblinding is N/A  
2  
3 li 1 permissible, and procedure for revealing a participant's  
4 n 7 allocated intervention during the trial  
5  
6 d b  
7  
8 i  
9 n  
10 g  
11 (  
12 m  
13 a  
14 s  
15 k  
16 i  
17 n  
18 g  
19 ):  
20 e  
21 m  
22 e  
23 r  
24 g  
25 e  
26 n  
27 c  
28 y  
29 u  
30 n  
31 b  
32 li  
33 n  
34 d  
35 i  
36 n  
37 g  
38  
39  
40  
41  
42  
43  
44  
45  
46  
47  
48  
49  
50  
51  
52  
53  
54  
55  
56  
57  
58  
59  
60

N/A

1 D # Plans for assessment and collection of outcome, baseline,  
2  
3 a 1 and other trial data, including any related processes to  
4 t 8 promote data quality (eg, duplicate measurements, training  
5 a a of assessors) and a description of study instruments (eg,  
6 c questionnaires, laboratory tests) along with their reliability  
7 o and validity, if known. Reference to where data collection  
8 ll forms can be found, if not in the protocol  
9  
10  
11 e  
12  
13 c  
14 ti  
15 o  
16 n  
17 p  
18 l  
19 a  
20 n  
21  
22  
23  
24  
25  
26  
27  
28  
29  
30  
31  
32  
33  
34  
35  
36  
37  
38  
39  
40  
41  
42  
43  
44  
45  
46  
47  
48  
49  
50  
51  
52  
53  
54  
55  
56  
57  
58  
59  
60

1 D # Plans to promote participant retention and complete follow- 19  
2 a 1 up, including list of any outcome data to be collected for  
3 t 8 participants who discontinue or deviate from intervention  
4 a b protocols  
5  
6 c  
7  
8 o  
9  
10 ll  
11 e  
12 c  
13 ti  
14 o  
15 n  
16 p  
17 l  
18 a  
19 n  
20 :  
21 r  
22 e  
23 t  
24 e  
25 n  
26 ti  
27 o  
28 n  
29  
30  
31  
32  
33  
34  
35  
36  
37  
38  
39  
40  
41  
42  
43  
44  
45  
46  
47  
48  
49  
50  
51  
52  
53  
54  
55  
56  
57  
58  
59  
60

1 D # Plans for data entry, coding, security, and storage, including 24, 25  
2  
3 a 1 any related processes to promote data quality (eg, double  
4 t 9 data entry; range checks for data values). Reference to  
5  
6 a where details of data management procedures can be found,  
7 m if not in the protocol  
8  
9 a  
10 n  
11 a  
12 g  
13 e  
14 m  
15 e  
16 n  
17 t

23 S # Statistical methods for analysing primary and secondary 22  
24 t 2 outcomes. Reference to where other details of the statistical  
25 a 0 analysis plan can be found, if not in the protocol  
26  
27 ti a  
28  
29 st  
30  
31 i  
32 c  
33 s:  
34 o  
35 u  
36 t  
37 c  
38 o  
39 m  
40 e  
41 s

|    |    |   |                                                       |     |
|----|----|---|-------------------------------------------------------|-----|
| 1  | S  | # | Methods for any additional analyses (eg, subgroup and | N/A |
| 2  |    |   |                                                       |     |
| 3  | t  | 2 | adjusted analyses)                                    |     |
| 4  | a  | 0 |                                                       |     |
| 5  |    |   |                                                       |     |
| 6  | t  | i | b                                                     |     |
| 7  |    |   |                                                       |     |
| 8  | s  |   |                                                       |     |
| 9  | i  |   |                                                       |     |
| 10 |    |   |                                                       |     |
| 11 | c  |   |                                                       |     |
| 12 | s: |   |                                                       |     |
| 13 | a  |   |                                                       |     |
| 14 | d  |   |                                                       |     |
| 15 |    |   |                                                       |     |
| 16 | d  |   |                                                       |     |
| 17 |    |   |                                                       |     |
| 18 | i  |   |                                                       |     |
| 19 |    |   |                                                       |     |
| 20 | o  |   |                                                       |     |
| 21 |    |   |                                                       |     |
| 22 | n  |   |                                                       |     |
| 23 |    |   |                                                       |     |
| 24 | a  |   |                                                       |     |
| 25 |    |   |                                                       |     |
| 26 | l  |   |                                                       |     |
| 27 |    |   |                                                       |     |
| 28 | a  |   |                                                       |     |
| 29 |    |   |                                                       |     |
| 30 | n  |   |                                                       |     |
| 31 |    |   |                                                       |     |
| 32 | l  |   |                                                       |     |
| 33 |    |   |                                                       |     |
| 34 | y  |   |                                                       |     |
| 35 |    |   |                                                       |     |
| 36 | s  |   |                                                       |     |
| 37 |    |   |                                                       |     |
| 38 | e  |   |                                                       |     |
| 39 |    |   |                                                       |     |
| 40 | s  |   |                                                       |     |
| 41 |    |   |                                                       |     |
| 42 |    |   |                                                       |     |
| 43 |    |   |                                                       |     |
| 44 |    |   |                                                       |     |
| 45 |    |   |                                                       |     |
| 46 |    |   |                                                       |     |
| 47 |    |   |                                                       |     |
| 48 |    |   |                                                       |     |
| 49 |    |   |                                                       |     |
| 50 |    |   |                                                       |     |
| 51 |    |   |                                                       |     |
| 52 |    |   |                                                       |     |
| 53 |    |   |                                                       |     |
| 54 |    |   |                                                       |     |
| 55 |    |   |                                                       |     |
| 56 |    |   |                                                       |     |
| 57 |    |   |                                                       |     |
| 58 |    |   |                                                       |     |
| 59 |    |   |                                                       |     |
| 60 |    |   |                                                       |     |



|    |    |   |                                                             |     |
|----|----|---|-------------------------------------------------------------|-----|
| 1  | S  | # | Definition of analysis population relating to protocol non- | N/A |
| 2  |    |   |                                                             |     |
| 3  | t  | 2 | adherence (eg, as randomised analysis), and any statistical |     |
| 4  | a  | 0 | methods to handle missing data (eg, multiple imputation)    |     |
| 5  |    |   |                                                             |     |
| 6  | t  | i | c                                                           |     |
| 7  |    |   |                                                             |     |
| 8  | s  | t |                                                             |     |
| 9  | i  |   |                                                             |     |
| 10 |    |   |                                                             |     |
| 11 | c  |   |                                                             |     |
| 12 | s: |   |                                                             |     |
| 13 | a  |   |                                                             |     |
| 14 |    |   |                                                             |     |
| 15 | n  |   |                                                             |     |
| 16 |    |   |                                                             |     |
| 17 | a  |   |                                                             |     |
| 18 |    |   |                                                             |     |
| 19 | l  |   |                                                             |     |
| 20 |    |   |                                                             |     |
| 21 | y  |   |                                                             |     |
| 22 |    |   |                                                             |     |
| 23 | si |   |                                                             |     |
| 24 |    |   |                                                             |     |
| 25 | s  |   |                                                             |     |
| 26 |    |   |                                                             |     |
| 27 | p  |   |                                                             |     |
| 28 |    |   |                                                             |     |
| 29 | o  |   |                                                             |     |
| 30 |    |   |                                                             |     |
| 31 | p  |   |                                                             |     |
| 32 |    |   |                                                             |     |
| 33 | u  |   |                                                             |     |
| 34 |    |   |                                                             |     |
| 35 | l  |   |                                                             |     |
| 36 |    |   |                                                             |     |
| 37 | a  |   |                                                             |     |
| 38 |    |   |                                                             |     |
| 39 | ti |   |                                                             |     |
| 40 |    |   |                                                             |     |
| 41 | o  |   |                                                             |     |
| 42 |    |   |                                                             |     |
| 43 | n  |   |                                                             |     |
| 44 |    |   |                                                             |     |
| 45 | a  |   |                                                             |     |
| 46 |    |   |                                                             |     |
| 47 | n  |   |                                                             |     |
| 48 |    |   |                                                             |     |
| 49 | d  |   |                                                             |     |
| 50 |    |   |                                                             |     |
| 51 | m  |   |                                                             |     |
| 52 |    |   |                                                             |     |
| 53 | is |   |                                                             |     |
| 54 |    |   |                                                             |     |
| 55 | si |   |                                                             |     |
| 56 |    |   |                                                             |     |
| 57 | n  |   |                                                             |     |
| 58 |    |   |                                                             |     |
| 59 | g  |   |                                                             |     |
| 60 |    |   |                                                             |     |

24, 25

1 D # Composition of data monitoring committee (DMC);  
2  
3 a 2 summary of its role and reporting structure; statement of  
4 t 1 whether it is independent from the sponsor and competing  
5 a a interests; and reference to where further details about its  
6 m charter can be found, if not in the protocol. Alternatively,  
7 o an explanation of why a DMC is not needed  
8  
9  
10  
11  
12  
13  
14  
15  
16  
17  
18  
19  
20  
21  
22  
23  
24  
25  
26  
27  
28  
29  
30  
31  
32  
33  
34  
35  
36  
37  
38  
39  
40  
41  
42  
43  
44  
45  
46  
47  
48  
49  
50  
51  
52  
53  
54  
55  
56  
57  
58  
59  
60

|    |     |                                                              |        |
|----|-----|--------------------------------------------------------------|--------|
| 1  | D # | Description of any interim analyses and stopping             | N/A    |
| 2  |     |                                                              |        |
| 3  | a 2 | guidelines, including who will have access to these interim  |        |
| 4  | t 1 | results and make the final decision to terminate the trial   |        |
| 5  |     |                                                              |        |
| 6  | a b |                                                              |        |
| 7  | m   |                                                              |        |
| 8  |     |                                                              |        |
| 9  | o   |                                                              |        |
| 10 | n   |                                                              |        |
| 11 | it  |                                                              |        |
| 12 |     |                                                              |        |
| 13 | o   |                                                              |        |
| 14 | ri  |                                                              |        |
| 15 | n   |                                                              |        |
| 16 | g   |                                                              |        |
| 17 | :   |                                                              |        |
| 18 | i   |                                                              |        |
| 19 | n   |                                                              |        |
| 20 | t   |                                                              |        |
| 21 | e   |                                                              |        |
| 22 | ri  |                                                              |        |
| 23 | m   |                                                              |        |
| 24 | a   |                                                              |        |
| 25 | n   |                                                              |        |
| 26 | a   |                                                              |        |
| 27 | l   |                                                              |        |
| 28 | y   |                                                              |        |
| 29 | si  |                                                              |        |
| 30 | s   |                                                              |        |
| 31 |     |                                                              |        |
| 32 |     |                                                              |        |
| 33 |     |                                                              |        |
| 34 |     |                                                              |        |
| 35 |     |                                                              |        |
| 36 |     |                                                              |        |
| 37 |     |                                                              |        |
| 38 |     |                                                              |        |
| 39 |     |                                                              |        |
| 40 |     |                                                              |        |
| 41 | H # | Plans for collecting, assessing, reporting, and managing     | 24, 25 |
| 42 | a 2 | solicited and spontaneously reported adverse events and      |        |
| 43 | r 2 | other unintended effects of trial interventions or trial     |        |
| 44 | m   | conduct                                                      |        |
| 45 |     |                                                              |        |
| 46 | s   |                                                              |        |
| 47 |     |                                                              |        |
| 48 |     |                                                              |        |
| 49 |     |                                                              |        |
| 50 | A # | Frequency and procedures for auditing trial conduct, if any, | 24, 25 |
| 51 | u 2 | and whether the process will be independent from             |        |
| 52 | d 3 | investigators and the sponsor                                |        |
| 53 |     |                                                              |        |
| 54 | it  |                                                              |        |
| 55 | i   |                                                              |        |
| 56 |     |                                                              |        |
| 57 |     |                                                              |        |
| 58 |     |                                                              |        |
| 59 |     |                                                              |        |
| 60 |     |                                                              |        |

n  
g  
  
  
  
  
  
  
  
  
  
R # Plans for seeking research ethics committee / institutional  
e 2 review board (REC / IRB) approval  
s 4  
e  
a  
r  
c  
h  
e  
t  
h  
i  
c  
s  
a  
p  
p  
r  
o  
v  
a  
l

23, 24

|    |    |   |                                                              |        |
|----|----|---|--------------------------------------------------------------|--------|
| 1  | P  | # | Plans for communicating important protocol modifications     | N/A    |
| 2  |    |   |                                                              |        |
| 3  | r  | 2 | (eg, changes to eligibility criteria, outcomes, analyses) to |        |
| 4  |    |   |                                                              |        |
| 5  | o  | 5 | relevant parties (eg, investigators, REC / IRBs, trial       |        |
| 6  | t  |   | participants, trial registries, journals, regulators)        |        |
| 7  |    |   |                                                              |        |
| 8  | o  |   |                                                              |        |
| 9  | c  |   |                                                              |        |
| 10 |    |   |                                                              |        |
| 11 | o  |   |                                                              |        |
| 12 | l  |   |                                                              |        |
| 13 |    |   |                                                              |        |
| 14 | a  |   |                                                              |        |
| 15 | m  |   |                                                              |        |
| 16 | e  |   |                                                              |        |
| 17 | n  |   |                                                              |        |
| 18 |    |   |                                                              |        |
| 19 | d  |   |                                                              |        |
| 20 |    |   |                                                              |        |
| 21 | m  |   |                                                              |        |
| 22 | e  |   |                                                              |        |
| 23 |    |   |                                                              |        |
| 24 | n  |   |                                                              |        |
| 25 | ts |   |                                                              |        |
| 26 |    |   |                                                              |        |
| 27 |    |   |                                                              |        |
| 28 | C  | # | Who will obtain informed consent or assent from potential    | 13, 14 |
| 29 |    |   |                                                              |        |
| 30 | o  | 2 | trial participants or authorised surrogates, and how (see    |        |
| 31 |    |   |                                                              |        |
| 32 | n  | 6 | Item 32)                                                     |        |
| 33 | s  | a |                                                              |        |
| 34 | e  |   |                                                              |        |
| 35 |    |   |                                                              |        |
| 36 | n  |   |                                                              |        |
| 37 | t  |   |                                                              |        |
| 38 |    |   |                                                              |        |
| 39 | o  |   |                                                              |        |
| 40 |    |   |                                                              |        |
| 41 | r  |   |                                                              |        |
| 42 | a  |   |                                                              |        |
| 43 | s  |   |                                                              |        |
| 44 |    |   |                                                              |        |
| 45 | s  |   |                                                              |        |
| 46 | e  |   |                                                              |        |
| 47 |    |   |                                                              |        |
| 48 | n  |   |                                                              |        |
| 49 | t  |   |                                                              |        |
| 50 |    |   |                                                              |        |
| 51 |    |   |                                                              |        |
| 52 |    |   |                                                              |        |
| 53 |    |   |                                                              |        |
| 54 |    |   |                                                              |        |
| 55 |    |   |                                                              |        |
| 56 |    |   |                                                              |        |
| 57 |    |   |                                                              |        |
| 58 |    |   |                                                              |        |
| 59 |    |   |                                                              |        |
| 60 |    |   |                                                              |        |

1 C # Additional consent provisions for collection and use of N/A  
2  
3 o 2 participant data and biological specimens in ancillary  
4 n 6 studies, if applicable  
5  
6 s b  
7  
8 e  
9  
10 n  
11  
12 t  
13  
14 o  
15  
16 r  
17  
18 a  
19  
20 s  
21  
22 s  
23  
24 e  
25  
26 n  
27  
28 t:  
29  
30 a  
31  
32 n  
33  
34 c  
35  
36 il  
37  
38 l  
39  
40 a  
41  
42 r  
43  
44 y  
45  
46 st  
47  
48 u  
49  
50 d  
51  
52 i  
53  
54 e  
55  
56 s  
57  
58  
59  
60

1 C # How personal information about potential and enrolled 13, 14  
2  
3 o 2 participants will be collected, shared, and maintained in  
4 n 7 order to protect confidentiality before, during, and after the  
5 fi trial  
6  
7 d  
8  
9 e

10 n  
11 ti  
12 a  
13 li  
14 t  
15 y  
16  
17  
18  
19  
20  
21 D # Financial and other competing interests for principal 28  
22 e 2 investigators for the overall trial and each study site  
23 c 8

24 l  
25 a  
26 r  
27 a  
28 ti  
29 o  
30 n  
31 o  
32 f  
33 i  
34 n  
35 t  
36 e  
37 r  
38 e  
39 st  
40 s  
41  
42  
43  
44  
45  
46  
47  
48  
49  
50  
51  
52  
53  
54  
55  
56  
57  
58  
59  
60

1 D # Statement of who will have access to the final trial dataset, N/A  
2  
3 a 2 and disclosure of contractual agreements that limit such  
4 t 9 access for investigators  
5

6 a  
7 a  
8 c  
9 c  
10 c  
11 e  
12 s  
13 s  
14  
15

17 A # Provisions, if any, for ancillary and post-trial care, and for N/A  
18 n 3 compensation to those who suffer harm from trial  
19 c 0 participation  
20

21 il  
22 l  
23 a  
24 r  
25 y  
26 a  
27 n  
28 d  
29 p  
30 o  
31 st  
32 tr  
33 i  
34 a  
35 l  
36 c  
37 a  
38 r  
39 e  
40  
41  
42  
43  
44  
45  
46  
47  
48  
49  
50  
51  
52  
53  
54  
55  
56  
57  
58  
59  
60



N/A

D # Plans for investigators and sponsor to communicate trial  
is 3 results to participants, healthcare professionals, the public,  
s 1 and other relevant groups (eg, via publication, reporting in  
e a results databases, or other data sharing arrangements),  
m including any publication restrictions  
i  
n  
a  
ti  
o  
n  
p  
o  
li  
c  
y  
:  
tr  
i  
a  
l  
r  
e  
s  
u  
lt  
s

1 D # Authorship eligibility guidelines and any intended use of N/A  
2  
3 is 3 professional writers  
4 s 1  
5 e b  
6 m  
7 i  
8 n  
9 a  
10 ti  
11 o  
12 n  
13 p  
14 o  
15 li  
16 c  
17 y  
18 :  
19 a  
20 u  
21 t  
22 h  
23 o  
24 r  
25 s  
26 h  
27 i  
28 p  
29  
30  
31  
32  
33  
34  
35  
36  
37  
38  
39  
40  
41  
42  
43  
44  
45  
46  
47  
48  
49  
50  
51  
52  
53  
54  
55  
56  
57  
58  
59  
60

1 D # Plans, if any, for granting public access to the full protocol, N/A  
2 is 3 participant-level dataset, and statistical code  
3 s 1  
4 e c  
5 m  
6 i  
7 n  
8 a  
9 ti  
10 o  
11 n  
12 p  
13 o  
14 li  
15 c  
16 y  
17 :  
18 r  
19 e  
20 p  
21 r  
22 o  
23 d  
24 u  
25 c  
26 i  
27 b  
28 l  
29 e  
30 r  
31 e  
32 s  
33 e  
34 a  
35 r  
36 c  
37 h

|    |    |   |                                                               |     |
|----|----|---|---------------------------------------------------------------|-----|
| 1  | I  | # | Model consent form and other related documentation given      | N/A |
| 2  |    |   |                                                               |     |
| 3  | n  | 3 | to participants and authorised surrogates                     |     |
| 4  | f  | 2 |                                                               |     |
| 5  |    |   |                                                               |     |
| 6  | o  |   |                                                               |     |
| 7  | r  |   |                                                               |     |
| 8  |    |   |                                                               |     |
| 9  | m  |   |                                                               |     |
| 10 |    |   |                                                               |     |
| 11 | e  |   |                                                               |     |
| 12 | d  |   |                                                               |     |
| 13 |    |   |                                                               |     |
| 14 | c  |   |                                                               |     |
| 15 | o  |   |                                                               |     |
| 16 | n  |   |                                                               |     |
| 17 |    |   |                                                               |     |
| 18 | s  |   |                                                               |     |
| 19 |    |   |                                                               |     |
| 20 | e  |   |                                                               |     |
| 21 | n  |   |                                                               |     |
| 22 | t  |   |                                                               |     |
| 23 |    |   |                                                               |     |
| 24 | m  |   |                                                               |     |
| 25 |    |   |                                                               |     |
| 26 | a  |   |                                                               |     |
| 27 | t  |   |                                                               |     |
| 28 |    |   |                                                               |     |
| 29 | e  |   |                                                               |     |
| 30 | ri |   |                                                               |     |
| 31 |    |   |                                                               |     |
| 32 | a  |   |                                                               |     |
| 33 | ls |   |                                                               |     |
| 34 |    |   |                                                               |     |
| 35 |    |   |                                                               |     |
| 36 | B  | # | Plans for collection, laboratory evaluation, and storage of   | N/A |
| 37 | i  | 3 | biological specimens for genetic or molecular analysis in     |     |
| 38 |    |   |                                                               |     |
| 39 | o  | 3 | the current trial and for future use in ancillary studies, if |     |
| 40 |    |   |                                                               |     |
| 41 | l  |   | applicable                                                    |     |
| 42 |    |   |                                                               |     |
| 43 | o  |   |                                                               |     |
| 44 |    |   |                                                               |     |
| 45 | g  |   |                                                               |     |
| 46 |    |   |                                                               |     |
| 47 | i  |   |                                                               |     |
| 48 |    |   |                                                               |     |
| 49 | c  |   |                                                               |     |
| 50 |    |   |                                                               |     |
| 51 | a  |   |                                                               |     |
| 52 |    |   |                                                               |     |
| 53 | l  |   |                                                               |     |
| 54 |    |   |                                                               |     |
| 55 | s  |   |                                                               |     |
| 56 |    |   |                                                               |     |
| 57 | p  |   |                                                               |     |
| 58 |    |   |                                                               |     |
| 59 | e  |   |                                                               |     |
| 60 |    |   |                                                               |     |
|    | c  |   |                                                               |     |
|    |    |   |                                                               |     |
|    | i  |   |                                                               |     |

1 m  
2 e  
3  
4 n  
5 s  
6  
7  
8  
9  
10  
11  
12  
13  
14  
15  
16  
17  
18  
19  
20  
21  
22  
23  
24

## Author notes

1. 15, 16, 17, 18

The SPIRIT checklist is distributed under the terms of the Creative Commons Attribution License CC-BY-ND 3.0. This checklist was completed on 12. December 2018 using <http://www.goodreports.org/>, a tool made by the [EQUATOR Network](#) in collaboration with [Penelope.ai](#)

# BMJ Open

**The Surveillance After Extremity Tumour surgery (SAFETY)  
Trial: Protocol for a pilot study to determine the feasibility  
of a multi-centre randomized controlled trial**

|                                 |                                                                                                                 |
|---------------------------------|-----------------------------------------------------------------------------------------------------------------|
| Journal:                        | <i>BMJ Open</i>                                                                                                 |
| Manuscript ID                   | bmjopen-2019-029054.R1                                                                                          |
| Article Type:                   | Protocol                                                                                                        |
| Date Submitted by the Author:   | 15-Jul-2019                                                                                                     |
| Complete List of Authors:       | Ghert, Michelle; McMaster University, Department of Surgery; Hamilton Health Sciences, Juravinski Cancer Centre |
| <b>Primary Subject Heading</b>: | Oncology                                                                                                        |
| Secondary Subject Heading:      | Surgery                                                                                                         |
| Keywords:                       | surveillance, soft tissue sarcoma, study protocol, randomised controlled trial, pilot study                     |
|                                 |                                                                                                                 |

SCHOLARONE™  
Manuscripts

1  
2  
3 *Original article*  
4

5 **The Surveillance AftEr Extremity Tumour surgerY (SAFETY) Trial: Protocol for a pilot**  
6  
7 **study to determine the feasibility of a multi-centre randomized controlled trial**  
8

9  
10 The SAFETY Investigators  
11  
12

13  
14  
15 **Protocol version 1; December 3, 2018**  
16  
17  
18  
19  
20  
21  
22  
23  
24  
25

26 **Correspondence and reprints**  
27

28 Michelle Ghert, MD, FRCSC  
29

30 Professor of Surgery  
31

32 Division of Orthopaedic Surgery  
33

34 Department of Surgery  
35

36 McMaster University  
37

38 711 Concession Street  
39

40 Hamilton, ON  
41

42 Canada  
43

44 Tel: 905-387-9495 ext 64089  
45

46 Fax: 905-381-7071  
47

48 Email: [mgbert@hhsc.ca](mailto:mgbert@hhsc.ca)  
49

50  
51  
52  
53 **Contributor list with affiliations**  
54  
55  
56  
57  
58  
59  
60

1  
2  
3 Michelle Ghert, MD, FRCSC (Steering Committee Chair)  
4 Department of Surgery, McMaster University (Hamilton, Ontario, Canada)  
5  
6

7 Mohit Bhandari, MD, PhD, FRCSC  
8 Department of Surgery & Department of Health Research Methods, Evidence and Impact,  
9 McMaster University (Hamilton, Ontario, Canada)  
10  
11

12 Anthony Bozzo, MD  
13 Department of Surgery, McMaster University (Hamilton, Ontario, Canada)  
14  
15

16 P.D. Sander Dijkstra, MD, PhD  
17 Department of Orthopaedics, Leiden University Medical Center (Leiden, the Netherlands)  
18  
19

20 Anthony Griffin, MSc  
21 Musculoskeletal Oncology Unit, Mount Sinai Hospital (Toronto, Ontario, Canada)  
22  
23

24 Robert Grimer, MB BS, DSc, FRCS, FRCS Ed(Orth)  
25 Department of Surgery, University of Birmingham (Birmingham, United Kingdom)  
26  
27

28 James Hayden, MD, PhD, FACS  
29 Department of Orthopaedics & Rehabilitation, Oregon Health & Science University (Portland,  
30 Oregon, USA)  
31  
32

33 Arlene Manherz  
34 (Community)  
35  
36

37 Karim Masrouha, MD  
38 Department of Surgery, McMaster University (Hamilton, Ontario, Canada)  
39  
40

41 Paula McKay, BSc  
42 Department of Surgery, McMaster University (Hamilton, Ontario, Canada)  
43  
44

45 Benjamin Miller, MD, MS, FACS  
46 Department of Orthopaedics & Rehabilitation, University of Iowa (Iowa City, Iowa, USA)  
47  
48

49 Naveen Parasu, MD, MRCP (UK), MRCR (UK), FRCPC  
50 Department of Radiology, McMaster University (Hamilton, Ontario, Canada)  
51  
52

53 Ajay Puri, MS (Ortho)  
54 Department of Surgical Oncology, Tata Memorial Centre (Mumbai, India)  
55  
56

57 R. Lor Randall, MD, FACS  
58  
59  
60



1  
2  
3 Department of Orthopaedic Surgery, University of California, Davis (Sacramento, California,  
4 USA)  
5

6  
7 Patricia Schneider, BSc  
8 Department of Surgery, McMaster University (Hamilton, Ontario, Canada)  
9

10  
11 Sheila Sprague, PhD  
12 Department of Surgery, McMaster University (Hamilton, Ontario, Canada)  
13

14  
15 Nina Szpakowski, MSc, DVM  
16 (Community)  
17

18  
19 Lehana Thabane, PhD  
20 Department of Health Research Methods, Evidence and Impact, McMaster University  
21 (Hamilton, Ontario, Canada)  
22

23  
24 Robert Turcotte, MD, FRCSC  
25 Department of Surgery, McGill University (Montreal, Quebec, Canada)  
26

27  
28 Roberto Vélez, MD, PhD  
29 Department of Orthopaedic Surgery, Hospital Vall d'Hebron (Barcelona, Catalunya, Spain)  
30

31  
32 David Wilson, MD, MSc  
33 Department of Surgery, McMaster University (Hamilton, Ontario, Canada)  
34

35  
36 Kevin Zbuk, MD, FRCPC  
37 Department of Oncology, McMaster University (Hamilton, Ontario, Canada)  
38

39  
40 Gordon Guyatt, MD, FRCPC  
41 Department of Medicine & Department of Health Research Methods, Evidence and Impact,  
42 McMaster University (Hamilton, Ontario, Canada)  
43  
44  
45  
46  
47  
48  
49  
50  
51  
52  
53  
54  
55  
56  
57  
58  
59  
60

## Abstract

**Introduction** Following the treatment of patients with soft tissue sarcomas (STS) that are not metastatic at presentation, the high risk for local and systemic disease recurrence necessitates post-treatment surveillance. Systemic recurrence is most often detected in the lungs. The most appropriate surveillance frequency and modality remain unknown and, as such, clinical practice is highly varied. We plan to assess the feasibility of conducting a multi-centre randomised controlled trial (RCT) that will evaluate the effect on overall five-year survival of two different surveillance frequencies and imaging modalities in patients with STS who undergo surgical excision with curative intent.

**Methods and analysis** The SAFETY trial will be a multi-centre 2X2 factorial randomized controlled trial. Patients with non-metastatic primary Grade II or III STS treated with excision will be allocated to one of four treatment arms: (1) chest radiograph (CXR) every three months for two years; (2) CXR every six months for two years; (3) chest computed tomography (CT) every three months for two years; or (4) chest CT every six months for two years. The primary outcome of the pilot study is the feasibility of a definitive RCT based on a combination of feasibility endpoints. Secondary outcomes for the pilot study include the primary outcome of the definitive trial (overall survival), patient-reported outcomes on anxiety, satisfaction and quality of life, local recurrence-free survival, metastasis-free survival, treatment-related complications, and net healthcare costs related to surveillance.

**Ethics and dissemination** This trial received *Pro Tempore* ethics approval from the McMaster / Hamilton Health Sciences Research Ethics Board. Final ethics approval will be obtained prior to commencing patient recruitment. Once feasibility has been established and the definitive protocol is finalized, the study will transition to the definitive study.

## Article summary

### Article focus

Surveillance AFter Extremity Tumour surgerY (SAFETY) is a pragmatic 2x2 factorial international multi-centre randomised controlled trial that aims to understand the impact of surveillance frequency and imaging modality on overall 5-year survival in patients with soft tissue sarcomas who underwent surgical resection. A pilot study assessing the feasibility of the definitive study will be undertaken first.

### Strengths and limitations of this study

- The SAFETY trial will be an international multi-centre 2X2 factorial randomized controlled trial
- The trial will answer a high priority question for sarcoma surgeons
- The SAFETY trial will build on the international collaboration and experience of the PARITY trial
- The feasibility pilot study is essential before undertaking this large multi-centre trial
- The success of the pilot study is dependent on the ability of clinical sites to recruit patients, comply with the protocol, and complete high quality follow-up data

**Keywords:** surveillance; soft tissue sarcoma; study protocol; randomized controlled trial; pilot study

### Background

*Magnitude of the problem*

1  
2  
3 Sarcomas are malignancies of connective tissue that most commonly occur in the extremities.  
4  
5 Sarcomas can arise within bone (bone sarcoma) or soft-tissue (soft-tissue sarcoma [STS]).  
6  
7  
8 Chemotherapy is not curative for the vast majority of patients with STS(1); therefore, surgery is  
9  
10 the standard treatment for STS, with radiation considered important for local disease control.  
11

12 Following treatment for a STS that is not metastatic at presentation, the risk for local and  
13  
14 systemic disease recurrence necessitates careful post-operative surveillance. Between 40% and  
15  
16 50% of all sarcoma patients will develop a local or distant recurrence; however, the risk of  
17  
18 recurrence is greatest in the first few years, with 68% occurring by two years and 90% by five  
19  
20 years(2-4). Metastasis to the lung is the most frequent single location of disease recurrence in  
21  
22 sarcoma patients, occurring in the majority of patients with metastases(4-7). Therefore, routine  
23  
24 follow-up after completing sarcoma treatment is standard practice in the first five years after  
25  
26 surgery. These visits typically include a clinical history, physical examination, and imaging of the  
27  
28 lungs (chest radiograph [CXR], or computed tomography [CT] scan of the lungs).  
29  
30  
31

32  
33 Surveillance strategies for long-term follow-up of sarcoma patients have not been well  
34  
35 researched and current guidelines are based on expert opinion, not on high quality evidence(8, 9).  
36  
37 As such, current clinical practice is highly varied, with survey data of musculoskeletal oncologists  
38  
39 showing that the number of clinic visits ranges from two to 12, the number of CXRs obtained  
40  
41 ranges from zero to 13, and the number of CT scans ranges from one to eight in the first year of  
42  
43 surveillance(10-12). The current National Comprehensive Cancer Network guidelines suggest that  
44  
45 stage II or III tumors should be followed with chest imaging (CT or CXR) every two to six months  
46  
47 for the first two to three years and then annually thereafter, while stage I tumors could be followed  
48  
49 less frequently during the first two to three years (13).  
50  
51  
52  
53  
54  
55  
56  
57  
58  
59  
60

1  
2  
3 *Best evidence for surveillance strategies*  
4

5 Post-treatment soft-tissue sarcoma surveillance is an integral element of patient care. Although  
6 earlier detection of metastatic disease may improve long-term survival, no study has yet provided  
7 definitive evidence to support this assumption. In order to assess the available evidence, we  
8 completed a systematic review of the available randomized controlled trial (RCT) evidence for  
9 surveillance in sarcoma management(14). A single study (published separately with early and  
10 longer-term follow-up) was identified(15, 16). The authors of this single-centre study found that  
11 three-year overall and disease-free survival was not worse in sarcoma patients who had less  
12 intensive surveillance (CXR) than those with more intensive surveillance (CT scans)(15). Due to  
13 the sample size, this trial could not conclusively demonstrate non-inferiority in overall or disease-  
14 free survival for a six-monthly interval of follow-up visits against three-monthly interval (both  
15 were 64% and 69%, respectively)(15).  
16  
17  
18  
19  
20  
21  
22  
23  
24  
25  
26  
27  
28  
29

30  
31 A follow-up study on the same patient cohort with five-year survival outcomes confirmed  
32 that more frequent follow-up did not improve survival and that, although CT scans detected  
33 pulmonary metastasis earlier, they did not lead to better survival compared with CXRs(16).  
34 However, this was a single-centre study with relatively small numbers and, therefore, confidence  
35 in the results and generalizability of the data to other centres is limited. In addition, a relatively  
36 small proportion of screened patients (42%) that were eligible for the trial were included due to  
37 the exclusion of patients unlikely to follow-up, thus possibly introducing selection bias(15).  
38 Furthermore, low-grade sarcomas were eligible and included in this study, even though they have  
39 little metastatic potential and tumour-related mortality; their inclusion may have diminished the  
40 magnitude of the effects of the interventions(15). Finally, the majority of the included patients  
41 were bone sarcoma patients, thereby limiting the interpretation to STS patients(15).  
42  
43  
44  
45  
46  
47  
48  
49  
50  
51  
52  
53  
54  
55  
56  
57  
58  
59  
60

### *Risks and benefits of intensive surveillance*

Regular, intensive surveillance is more likely to identify recurrent disease earlier than would less intensive surveillance. This type of surveillance may provide reassurance to patients and clinicians; however, the adverse effects of intensive surveillance practices are also noteworthy. The costs that healthcare systems incur as a result of sarcoma surveillance are substantial and could be in excess of USD \$20,000 for high-grade sarcomas(17). Furthermore, intensive surveillance can threaten the financial security of patients, due in part to the direct (including travel, accommodation, personal care, and homemaking) and indirect costs (including lost wages for patients and their caregivers) incurred as a result of follow-up appointments(18). As a result, patients' health and quality of life can be dramatically impacted(18-20).

Secondary investigations and earlier knowledge of disease recurrence can also induce anxiety and impact the psychosocial wellbeing for those whose mortality risk cannot be significantly reduced by further medical interventions(21). Overcrowded clinics and long wait times may constitute other important factors that affect patients' psychosocial wellbeing(22). Finally, the use of CT has raised concerns over unnecessary radiation exposure compared to radiographs, although lower dose CT scans may mitigate some of these concerns(23).

### *Surveillance research as a priority in orthopedic oncology*

We recently published a modified Delphi study in which we aimed to identify a clinically relevant consensus-based research agenda in the sarcoma field(24). From this Delphi process that included 80 orthopaedic oncologists and patient representation (with participation from 18 countries), we identified critical research priorities in the field of orthopaedic oncology and determined the top

1  
2  
3 four feasible and important research questions that will directly inform patient care and enhance  
4 clinical practice. This study identified the evaluation of post-operative surveillance strategies as  
5 the highest-ranking research priority in the sarcoma field(24).  
6  
7  
8  
9  
10

## 11 **Study design**

12 We plan to assess the feasibility of conducting the pragmatic, international, multi-centre, 2X2  
13 factorial Surveillance After Extremity Tumour surgery (SAFETY) RCT that answers the  
14 following questions: In extremity STS patients who undergo surgical resection with curative intent,  
15 (1) what is the impact of surveillance frequency (every three vs. every six months) on overall  
16 survival at five years, and (2) what is the impact of surveillance imaging modality (CXR vs. CT  
17 scan) on overall survival at five years? To assess feasibility, we will conduct a pilot study. Study  
18 participants will be randomized to one of four possible treatment arms (see Study Interventions  
19 below). Randomization will occur at the end of active treatment (surgery ± systemic treatment ±  
20 local radiation). Following the two-year intervention phase, study participants will continue to be  
21 assessed at regular intervals for an additional three years. As such, all pilot study patients will be  
22 transitioned into the definitive study and be included in it. Details of the flow of each study arm  
23 are outlined in Figure 1. We anticipate the duration of the pilot study to be three years in order to  
24 collect intervention phase data on all participants. The primary outcome of the pilot study is the  
25 feasibility of a definitive RCT based on a combination of feasibility endpoints.  
26  
27  
28  
29  
30  
31  
32  
33  
34  
35  
36  
37  
38  
39  
40  
41  
42  
43  
44  
45  
46

47 The 2x2 factorial study design is ideal and the most efficient method to study two treatment  
48 interventions in a single RCT, particularly when there is no interaction between the two  
49 interventions. This is unlike a scenario in which the two interventions are medications that may  
50 have a synergistic or negative effect when combined. A Bayesian design would be useful do avoid  
51  
52  
53  
54  
55  
56  
57  
58  
59  
60

1  
2  
3 the question of whether or not an interaction exists, however for the purposes of the present trial it  
4 is clear that no interaction exists between the frequency and intensity of surveillance. As Freidlin  
5 and Korn discuss in their commentary, the 2x2 factorial design is an efficient design to evaluate  
6 two interventions in a cancer clinical trial when there are no interactions between treatments(25).  
7  
8  
9  
10  
11  
12

## 13 **Objectives**

### 14 *Pilot study primary research objectives*

15  
16 The primary objective of the pilot study will be to determine whether it is feasible to conduct a  
17 large multi-centre RCT that will evaluate the impact of surveillance strategies on patient survival  
18 following extremity STS surgery. To do so, we will assess our ability to:  
19  
20  
21  
22

- 23 A) Recruit patients across multiple participating clinical sites;
  - 24 B) Ensure compliance with the study protocol, including the application of eligibility criteria,  
25 timing of intervention phase and post-intervention phase visits and imaging modality;
  - 26 C) Maintain completeness of follow-up data;
  - 27 D) Maintain completeness of cost analysis data; and
  - 28 E) Maintain data quality.
- 29  
30  
31  
32  
33  
34  
35  
36  
37  
38  
39  
40

### 41 *Pilot study secondary research objectives*

42 The secondary objectives of the pilot study will include assessing the impact of either surveillance  
43 frequency (every three vs. every six months) or imaging modality (CXR vs. CT scan) on:  
44  
45  
46  
47

- 48 A) Overall survival;
  - 49 B) Patient anxiety, satisfaction and quality of life;
  - 50 C) Local recurrence-free survival and metastasis-free survival;
  - 51 D) Treatment-related complications; and
- 52  
53  
54  
55  
56  
57  
58  
59  
60



1  
2  
3 E) Net direct healthcare costs and net costs of treatment and treatment-related complications once  
4  
5 metastases are detected.  
6  
7  
8  
9

## 10 **Hypothesis**

### 11 *Pilot study*

12  
13  
14 We hypothesize that the SAFETY trial will be feasible due to: A) its pragmatic design; B) our  
15 established international collaborative research network; C) our qualified, multi-disciplinary study  
16 team; D) our existing trial infrastructure; and E) the priority of the study question.  
17  
18  
19  
20  
21  
22  
23

### 24 *Definitive study*

25  
26 There are two hypotheses:

27  
28 1- More frequent post-operative surveillance (compared to less frequent post-operative  
29 surveillance) in the first two years following the surgical excision of a STS will improve survival  
30 over five years;  
31  
32  
33

34  
35 2 - The use of post-operative CT scans (compared to CXR) in the first two years following the  
36 surgical excision of a STS will improve survival over five years.  
37  
38  
39  
40  
41  
42

## 43 **Study setting**

44  
45 This study will be coordinated by the Methods Centre within the Centre for Evidence-Based  
46 Orthopaedics (CEO) at McMaster University (Hamilton, ON, Canada). For the pilot study, we  
47 expect that patients will be enrolled from ten clinical sites across four continents. Clinical sites  
48 will be carefully screened prior to participation in the study. The clinical site inclusion criteria are:  
49  
50  
51  
52

53  
54 I) adequate research personnel and infrastructure to manage the study; II) sufficiently high  
55  
56  
57  
58  
59  
60

1  
2  
3 extremity STS volume to complete enrollment within the study timeline (defined as greater than  
4 or equal to ( $\geq$ ) 20 patients per year); III) commitment from all or most orthopaedic oncologists to  
5 participate in the trial; and IV) access to the two imaging modalities. The exclusion criteria are: I)  
6 a lack of interest in the trial; II) anticipated challenges with protocol compliance; III) conflicting  
7 studies, in the judgment of the Principal Investigator, that would inhibit patient participation; and  
8 IV) financial or contract constraints.  
9  
10  
11  
12  
13  
14  
15  
16  
17  
18

### 19 **Patient eligibility criteria**

#### 20 *Inclusion criteria*

21 Patients who meet all of the following criteria will be included:  
22  
23

- 24 1) Age of 18 years or older;
- 25 2) Diagnosed with a primary extremity grade II or III STS;
- 26 3) Undergone surgical resection of the tumour with curative intent and grossly negative margins  
27 (R0 or R1 resection margins);
- 28 4) Completed neoadjuvant or adjuvant radiation and / or chemotherapy, if applicable;
- 29 5) The tumour size is greater than or equal to ( $\geq$ ) five centimeters according to the pathology  
30 report or pre-treatment MRI if neoadjuvant radiation and / or chemotherapy are given; and  
31 6) Provision of informed consent.  
32  
33  
34  
35  
36  
37  
38  
39  
40  
41  
42  
43  
44  
45  
46

#### 47 *Exclusion criteria*

48 Patients who meet any of the following criteria will be excluded:  
49  
50  
51  
52  
53  
54  
55  
56  
57  
58  
59  
60

- 1) Metastatic disease at initial presentation based on thoracic imaging (a second CT scan may be required to confirm that indeterminate nodules are false positives before the patient can be enrolled provided that the second CT scan shows no evidence of metastatic disease);
- 2) Undergone surgical excision of a local recurrence;
- 3) Diagnosis of one of the special sub-types: myxoid / round cell liposarcoma or extra-skeletal Ewing's sarcoma (These sarcomas have different metastatic patterns, which necessitate different surveillance protocols);
- 4) Previous diagnosis of a genetic syndrome with an elevated risk of malignancy, such as Li-Fraumeni Syndrome (such individuals appear to be at an elevated risk for radiation-induced cancers, so the use of CT scans should be limited);
- 5) Previous diagnosis with a co-morbid condition that has a life expectancy of less than one year;
- 6) The site-specific surveillance protocol for the patient's disease is not compatible with the study protocol (i.e., regular planned whole-body imaging with positron emission tomography [PET] scans);
- 7) Diagnosed with another malignancy within the past five years;
- 8) Likely problems, in the judgment of the investigator, with maintaining follow-up; and
- 9) Currently enrolled in a study that does not permit co-enrollment;
- 10) The patient has already been enrolled in the SAFETY trial.

### **Recruitment and screening**

Each participating clinical site will have a locally responsible investigator who will oversee the local administration of the trial, screen STS patients for eligibility, and develop a site-specific patient enrollment plan. A Screening Form will be completed for all STS patients aged 18 years

1  
2  
3 or older, irrespective of whether they are eligible to participate in the study or not. Patients will  
4 become eligible, will be screened and consented during the first clinic visit at which all treatment  
5 is complete, the surgical wound has healed, and the plan for post-treatment surveillance is  
6 discussed with the patient. The process of obtaining and documenting informed consent will be  
7 completed in accordance with local Good Clinical Practice recommendations. Consent procedures  
8 will comply with the appropriate ethics committee and the Health Insurance Portability and  
9  
10  
11  
12  
13  
14  
15  
16  
17  
18  
19  
20  
21  
22  
23  
24  
25  
26  
27  
28  
29  
30  
31  
32  
33  
34  
35  
36  
37  
38  
39  
40  
41  
42  
43  
44  
45  
46  
47  
48  
49  
50  
51  
52  
53  
54  
55  
56  
57  
58  
59  
60

or older, irrespective of whether they are eligible to participate in the study or not. Patients will become eligible, will be screened and consented during the first clinic visit at which all treatment is complete, the surgical wound has healed, and the plan for post-treatment surveillance is discussed with the patient. The process of obtaining and documenting informed consent will be completed in accordance with local Good Clinical Practice recommendations. Consent procedures will comply with the appropriate ethics committee and the Health Insurance Portability and Accountability Act (where applicable).

### **Randomisation and allocation of patients to study groups**

A centralised and automated internet-based randomisation system using random variable block sizes will assign participants to the study groups. Study personnel at each participating site will complete this task. Randomisation will occur only after eligibility is confirmed and consent to participate has been obtained. Participants will be stratified based on clinical site and peri-operative chemotherapy.

### **Study interventions**

Participants will be randomised to one of four treatment groups:

- 1) CXR every three months for two years;
- 2) CXR every six months for two years;
- 3) Chest CT every three months for two years; or
- 4) Chest CT every six months for two years.

Following completion of the intervention phase, participants will continue to be followed in the study for an additional three years. During this three-year post-intervention phase,

1  
2  
3 participants will be followed at least every six months as per National Comprehensive Cancer  
4 Network (NCCN) guidelines(13). If possible, thoracic imaging will continue at each scheduled  
5  
6 post-intervention phase visit according to the participants' original allocations.  
7  
8  
9

## 10 11 12 **Relapse**

13  
14 Local imaging and clinical assessment of the primary tumour site will be carried out as per the  
15 standard protocol at each participating clinical site. Further diagnostic tests will be performed in  
16  
17 the presence of clinical symptoms or radiologic findings suggestive of disease relapse. Recurrence  
18  
19 will be radiologically or histologically confirmed and classified as local or systemic (metastasis)  
20  
21 recurrence. The first modality suggesting disease relapse in participants with confirmed local or  
22  
23 systemic recurrence will be recorded as responsible for its detection.  
24  
25  
26  
27  
28  
29  
30

## 31 **Outcome measures**

### 32 *Pilot study primary outcome*

33  
34 To evaluate feasibility, we will assess the number of patients screened and recruited at each  
35  
36 participating clinical site, participant retention, and maintenance of data quality. In addition, we  
37  
38 will evaluate the utilization of an internet-based centralized randomisation system focusing on the  
39  
40 accuracy of data entry, appropriate stratification of participants and the minimization of  
41  
42 randomisation errors. Finally, we will evaluate investigator and participant compliance with the  
43  
44 study protocol, including the application of eligibility criteria, compliance with the surveillance  
45  
46 imaging and frequency regimens, frequency of crossover and timing of post-intervention phase  
47  
48 visits. The a priori criteria for the success of the pilot study are listed below:  
49  
50  
51  
52  
53  
54  
55  
56  
57  
58  
59  
60

1  
2  
3 A) *Recruitment Measure*: We will consider our recruitment strategy feasible if we are able to enroll  
4 the pilot sample of 195 patients (approximately 20 patients from each clinical site participating in  
5 the pilot study) within two years. See sample size determination below. As such, we will aim to  
6 recruit 100 patients during the first year. If we are unable to achieve at least 90% of this goal (90  
7 patients) then we will plan to increase the number of participating sites as a study rescue measure.

8  
9  
10 B) *Protocol Adherence Measure*: During the pilot study of the PARITY trial, we were able to  
11 maintain an overall protocol adherence rate in excess of 90%(26). Recent reports prepared for the  
12 PARITY Data and Safety Monitoring Board (DSMB) indicate a similar protocol adherence rate.  
13 However, given the greater complexity and longer duration of the SAFETY trial interventions, we  
14 will consider our protocol adherence strategies feasible if there is adherence of 85% or greater to  
15 the visit windows and imaging modality prescribed by the protocol.

16  
17 C) *Participant Retention Measure*: While 20% loss-to-follow-up has traditionally been considered  
18 acceptable in clinical research, evidence from other orthopaedic trials suggests that bias begins to  
19 affect study results at even lower rates of loss-to-follow-up(27). Therefore, we will consider our  
20 participant retention strategies feasible if no more than 15% of participants are lost-to-follow-up.

21  
22 D) *Maintenance of Data Quality Measure*: We obtained a data completeness rate of approximately  
23 90% in the PARITY trial pilot study (26). Therefore, we will consider our data quality strategies  
24 feasible if we are able to maintain 95% or greater completeness of participant follow-up data for  
25 the definitive primary outcome. We will also consider our data quality strategies feasible if we are  
26 able to maintain 85% or greater completeness of participant follow-up data for the secondary  
27 outcomes.

28  
29  
30  
31  
32  
33  
34  
35  
36  
37  
38  
39  
40  
41  
42  
43  
44  
45  
46  
47  
48  
49  
50  
51  
52  
53  
54 *Pilot study secondary outcomes*  
55  
56  
57  
58  
59  
60

1  
2  
3 The main secondary outcome for the pilot study will be death from any cause. Data on secondary  
4 outcomes for the definitive trial, which are listed below, will also be collected. These include:  
5

6  
7 A) *Patient-reported outcome measures*: The validated Patient-Reported Outcomes Measurement  
8 Information System (PROMIS)<sup>®</sup> Cancer-Anxiety questionnaire, PROMIS<sup>®</sup> Satisfaction with  
9 Social Roles and Activities questionnaire, and the EuroQol-5 Dimension (EQ-5D) will be used to  
10 assess patient anxiety, satisfaction and quality of life, respectively. These questionnaires will be  
11 administered at the baseline visit, as well as the 6-month, 12-month, 18-month and 24-month  
12 intervention phase, as well as 36-month, 48-month and 60-month post-intervention phase visits.  
13  
14

15  
16 B) *Local recurrence-free survival (LRFS) outcome measure*: LRFS will be defined as the length  
17 of time from randomization that the participant survives with no detection of recurrent disease at  
18 the initial tumor site or operative field.  
19

20  
21 C) *Metastasis-free survival (MFS) outcome measure*: MFS will be defined as the length of time  
22 from randomization that the participant survives with no detection of systemic disease recurrence  
23 at any anatomic location.  
24  
25

26  
27 D) *Treatment-related complications outcome measures*: Treatment-related complications will  
28 include both chemotherapy-related complications, such as febrile neutropenia, fungal infections or  
29 sepsis, and thoracotomy-related complications, such as pneumothorax, or surgical site infections.  
30  
31

32  
33 E) *Net healthcare costs outcome measures*: We will perform an incremental cost analysis of net  
34 costs of surveillance and costs incurred from metastasis treatment and metastasis treatment related  
35 complications. Unit costs for all resources used by trial participants will be obtained from regional  
36 statistics and from centers participating in the trial. These unit costs will be combined with the  
37 resource volumes to obtain a net cost per participant over their time in the trial.  
38  
39  
40  
41  
42  
43  
44  
45  
46  
47  
48  
49  
50  
51  
52

## Protecting against sources of bias

### *Adjudication of outcomes*

An independent Central Adjudication Committee (CAC) will review all situations where eligibility is in doubt, as well as all reported instances of disease relapse, treatment-related complications, and death to determine whether a study event has occurred. The SAFETY CAC will be comprised of two orthopaedic oncologists, one medical oncologist, and one radiologist. All participating clinical sites will submit digital imaging and relevant hospital records to the Methods Centre via a web-based platform for events that require adjudication.

### *Blinding*

The local clinical team, site study personnel and participants cannot be blinded to the treatment allocation. The CAC will be blinded to surveillance frequency. The data analysts will, however, remain blinded during the trial's analysis.

### *Maximization of follow-up*

We anticipate only minimal losses to follow-up in our musculoskeletal oncology population. Nonetheless, the following procedures will be implemented to minimize losses:

- Individuals likely to present problems with compliance to the study protocol or maintaining follow-up will be excluded;
- At the time of randomization, participants will be asked to provide their contact information, as well as the contact information of their family physician and three alternate contacts;



- 1
- 2
- 3
- 4
- 5
- 6
- 7
- 8
- 9
- 10
- 11
- 12
- 13
- 14
- 15
- 16
- 17
- 18
- 19
- 20
- 21
- 22
- 23
- 24
- 25
- 26
- 27
- 28
- 29
- 30
- 31
- 32
- 33
- 34
- 35
- 36
- 37
- 38
- 39
- 40
- 41
- 42
- 43
- 44
- 45
- 46
- 47
- 48
- 49
- 50
- 51
- 52
- 53
- 54
- 55
- 56
- 57
- 58
- 59
- 60
- Participants who refuse to return for a study assessment will be asked if they are willing to provide follow-up data (to determine survival and to complete study questionnaires) via telephone;
- If a participant cannot be reached, their status regarding the primary study outcome will be assessed by reviewing their medical records;
- Study personnel will remind participants of upcoming clinic visits;
- To assuage possible concerns related to less frequent follow-up, participants will be encouraged to schedule an ad hoc visit anytime they are concerned, even if it breaks the surveillance protocol to which they were assigned;
- Participants will be provided with access to educational content, such as a video that demonstrates how to self-examine for a local recurrence of their STS; and
- Parking and travel vouchers will be provided to participants, where possible, to alleviate the costs associated with the study.

#### *Minimization of crossovers of surveillance interventions*

Crossovers are unlikely for either surveillance intervention as investigators will be requesting the imaging modality during surveillance visits. Any deviation with regards to frequency or imaging modality will be documented. In the event of disease recurrence or progression, the following standardized management protocols will be adopted:

- Local Recurrence: the participant will have a lung CT scan to confirm no progression of their systemic disease before continuing with the study protocol.

- 1  
2  
3  
4  
5  
6  
7  
8  
9
- Metastases: the participant will no longer be followed as per the study protocol, but per the appropriate follow-up for the interventions required for the treatment of metastases; however, the participant will continue to be followed in the trial.

10 For both events, the specific imaging modality used to detect either the local recurrence or the  
11 metastases will be documented.  
12  
13

14 Patients that have incidental or off-protocol imaging will not crossover, however this will  
15 be documented as a protocol deviation. In the case of a CXR that warrants further investigation  
16 with a CT scan, this will be documented. If the patient is found to have disease recurrence, we will  
17 document how the disease recurrence was (A) first identified; and (B) confirmed. If after a CT  
18 scan the patient is found to not have disease recurrence, the patient will resume surveillance as per  
19 the arm to which they were randomised.  
20  
21  
22  
23  
24  
25  
26  
27  
28  
29  
30

### 31 **Sample size determination**

#### 32 *Pilot study sample size*

33  
34  
35 The confidence interval approach was used to calculate the required sample size for the pilot  
36 study(28). We determined *a priori* that the definitive trial would only be feasible if our protocol  
37 adherence rate was at least 85%. Using a 95% confidence level and a 5% margin of error, we  
38 calculated a required sample size of 195 patients.  
39  
40  
41  
42  
43  
44  
45  
46

#### 47 *Definitive study sample size*

48  
49 Our best estimate of the control group overall five-year survival for both the surveillance frequency  
50 and imaging modality is 55%(16). Given that intensive surveillance will detect metastatic disease  
51 at an earlier stage, we will use a superiority design to compare survival between more versus less  
52  
53  
54  
55  
56  
57  
58  
59  
60

intensive surveillance. A 10% absolute increase in overall five-year survival associated with both more frequent surveillance and the use of CT scans represents a clinically important difference, as outlined by the American Society of Clinical Oncology's statement on clinically meaningful outcomes in cancer trials(29). Therefore, the definitive trial will be powered to detect an absolute difference of 10% in overall five-year survival.

With a desired power of 0.80, we calculated a sample size of 396 participants per study arm. We will account for a 5% loss to follow-up and, therefore, the final sample size will be 830 participants. **Table 1** shows various sample sizes for pairwise comparisons of alternative surveillance frequencies / imaging modalities given varying control event rates and absolute increases in survival. Statistical Package for the Social Sciences (SPSS) (IBM Corporation) software was used for sample size calculation.

The definitive sample size calculation may be adjusted as we prepare for the transition from the pilot to the definitive study as a result of data collected during the pilot study. One factor we may consider will be the percent lost to follow-up by the end of the pilot study. Other factors such as the estimated control group overall five-year survival, the clinically meaningful outcome, and power cannot be amended.

**Table 1.** Sample Size Per Group for 80% power,  $\alpha=0.05$ . Event rate = death

|                                                 |     | Event Rate in More Intensive Surveillance Group |      |      |      |
|-------------------------------------------------|-----|-------------------------------------------------|------|------|------|
|                                                 |     | 25%                                             | 30%  | 35%  | 40%  |
| Event Rate in Less Intensive Surveillance Group | 35% | 696                                             | 2832 | -    | -    |
|                                                 | 40% | 332                                             | 752  | 3020 | -    |
|                                                 | 45% | 196                                             | 352  | 792  | 3148 |

|  |     |     |     |     |     |
|--|-----|-----|-----|-----|-----|
|  | 50% | 132 | 204 | 368 | 816 |
|  | 55% | 96  | 136 | 212 | 372 |

### **Analysis of feasibility outcomes**

A full description of the measures, variables, and methods of analysis are shown in **Table 2**. We will record the total number of participants enrolled on a monthly basis. Each participating site will keep a Screening Log of included and excluded patients. We will also keep a record of participants who miss visits, and those who are withdrawn or lost to follow-up. These will be reported using descriptive statistics – reported as counts (percent) for categorical variables and mean (standard deviation) for continuous variables with 95% confidence intervals. We will report the proportion of complete CRFs as descriptive data.

### **Analysis of definitive study primary outcome**

The analysis and reporting of the trial will follow the CONSORT criteria. The primary analysis will compare the treatment groups on the overall 5-year survival. Two independent comparisons between treatment groups will be made using Cox regression models with time to the definitive primary endpoint. Results will be expressed as effect (ORs for binary outcomes, HRs for time-dependent outcomes and mean difference for continuous outcomes), corresponding 2-sided 95% CIs and associated p-values.

**Table 2.** Summary of Feasibility Outcomes Analysis Plan

| Objective                                                                            | Outcome                             | Criteria for success of feasibility                                                                                                      | Method of analysis                                                                                                                                   |
|--------------------------------------------------------------------------------------|-------------------------------------|------------------------------------------------------------------------------------------------------------------------------------------|------------------------------------------------------------------------------------------------------------------------------------------------------|
| To determine the feasibility of conducting the multi-centre SAFETY international RCT | Recruitment Measure                 | Enrollment of pilot sample within two years                                                                                              | Descriptive statistics reported as counts (percentage) for categorical variables and means (standard deviation) for continuous variables with 95% CI |
|                                                                                      | Protocol Adherence Measure          | Protocol adherence of 85% or greater                                                                                                     |                                                                                                                                                      |
|                                                                                      | Participant Retention Measure       | Loss-to-participant follow-up of 15% or less                                                                                             |                                                                                                                                                      |
|                                                                                      | Maintenance of Data Quality Measure | Data completeness of 95% or greater for the definitive primary outcome<br>Data completeness of 85% or greater for the secondary outcomes |                                                                                                                                                      |

### Ethical considerations

This study is to be conducted according to international standards of Good Clinical Practice, applicable government regulations, and institutional research policies and procedures. All study intervention phase (surveillance) arms fall within the spectrum of current standard practice, as do the standardized post-intervention phase follow-up visits. This trial has received *Pro Tempore* ethics approval from the McMaster / Hamilton Health Sciences Research Ethics Board on August 23<sup>rd</sup>, 2018. The study protocol will be submitted to a properly constituted independent ethics

1  
2  
3 committee, in agreement with local legal prescriptions, for formal approval of the study conduct  
4  
5 at each participating clinical site. A copy of this approval will be provided to the Methods Centre  
6  
7 by each participating clinical site prior to the local commencement of the study.  
8  
9

## 10 11 12 **Study Timeline**

13  
14 We expect that the pilot study will take just over three years to complete. We estimate that  
15  
16 recruitment will take approximately one year to complete per site. The initiation of screening and  
17  
18 enrollment will likely be staggered across the participating clinical sites due to the variability in  
19  
20 the time required to obtain ethics approval and negotiate institutional contracts. Therefore the pilot  
21  
22 study recruitment timeline will be up to two years. We expect a further one year for all pilot  
23  
24 participants to complete the intervention phase of the trial. Although we will not have complete  
25  
26 post-intervention phase data for any pilot participants, we anticipate being able to determine  
27  
28 feasibility at the end of the intervention phase based on our feasibility objectives. We plan *a priori*  
29  
30 to transition directly from the pilot to the definitive study if feasibility is established.  
31  
32  
33  
34  
35  
36  
37

## 38 **Data Safety Monitoring Board**

39  
40 As per the principles established by the *Data Monitoring Committees: Lessons, Ethics, Statistics*  
41  
42 (*DAMOCLES*) *Study Group* charter, a DSMB will oversee the safety of the trial participants and  
43  
44 the overall conduct of the trial. The Committee members will be independent of the trial, free of  
45  
46 conflicts with any of the investigative team, and will consist of two orthopaedic oncologists, a  
47  
48 medical oncologist, a radiologist, and a biostatistician. The DSMB will frequently review  
49  
50 enrollment and demographic summaries, listings of protocol deviations, and summaries and  
51  
52 listings of serious adverse events. They will advise the Principal Investigator and SAFETY study  
53  
54  
55  
56  
57  
58  
59  
60

1  
2  
3 team on any concerns related to participant safety and trial conduct and will make  
4 recommendations for: A) study continuation as designed; B) study termination; C) study  
5 continuation with major or minor modifications; or D) temporary study suspension of enrollment  
6 until some uncertainty is resolved.  
7  
8  
9  
10  
11  
12  
13  
14

### 15 **Potential impact of the study**

16  
17 The benefit of this pilot study would be to determine the feasibility of the SAFETY trial. This is  
18 essential prior to undertaking a large multi-centre RCT. Experience gained during the pilot study  
19 will provide insight into methods to increase enrollment, strategies to maintain protocol adherence  
20 and the adjustment of recruitment expectations. In addition, the ultimate success of the pilot study  
21 will support funding requests for the definitive study of the multi-centre SAFETY trial.  
22  
23  
24  
25  
26  
27

28 Once the feasibility endpoints are reached, we will transition directly into and begin  
29 recruiting for the definitive SAFETY trial. The ultimate goal of the SAFETY trial is to provide  
30 high-quality evidence for surveillance strategies following the treatment of STS, which will allow  
31 for the development of evidence-based clinical practice guidelines for sarcoma patients worldwide.  
32  
33  
34  
35  
36  
37  
38  
39

### 40 **References**

- 41  
42  
43  
44  
45 **1. Pervaiz N, Colterjohn N, Farrokhyar F, Tozer R, Figueredo A, Ghert M. A**  
46 **systematic meta-analysis of randomized controlled trials of adjuvant chemotherapy for**  
47 **localized resectable soft-tissue sarcoma. *Cancer*. 2008;113(3):573-81.**  
48 **2. Whooley BP, Mooney MM, Gibbs JF, Kraybill WG. Effective follow-up strategies in**  
49 **soft tissue sarcoma. *Seminars in surgical oncology*. 1999;17(1):83-7.**  
50 **3. Whooley BP, Gibbs JF, Mooney MM, McGrath BE, Kraybill WG. Primary**  
51 **extremity sarcoma: what is the appropriate follow-up? *Annals of surgical oncology*.**  
52 **2000;7(1):9-14.**  
53 **4. Kane JM, 3rd. Surveillance strategies for patients following surgical resection of**  
54 **soft tissue sarcomas. *Current opinion in oncology*. 2004;16(4):328-32.**  
55  
56  
57  
58  
59  
60

5. Gadd MA, Casper ES, Woodruff JM, McCormack PM, Brennan MF. Development and treatment of pulmonary metastases in adult patients with extremity soft tissue sarcoma. *Annals of surgery*. 1993;218(6):705-12.
6. Huth JF, Eilber FR. Patterns of metastatic spread following resection of extremity soft-tissue sarcomas and strategies for treatment. *Seminars in surgical oncology*. 1988;4(1):20-6.
7. Songur N, Dinc M, Ozdilekcan C, Eke S, Ok U, Oz M. Analysis of lung metastases in patients with primary extremity sarcoma. *Sarcoma*. 2003;7(2):63-7.
8. Group ESESNW. Bone sarcomas: ESMO Clinical Practice Guidelines for diagnosis, treatment and follow-up. *Annals of oncology : official journal of the European Society for Medical Oncology*. 2014;25 Suppl 3:iii113-23.
9. Group ESESNW. Soft tissue and visceral sarcomas: ESMO Clinical Practice Guidelines for diagnosis, treatment and follow-up. *Annals of oncology : official journal of the European Society for Medical Oncology*. 2014;25 Suppl 3:iii102-12.
10. Gerrand CH, Billingham LJ, Woll PJ, Grimer RJ. Follow up after Primary Treatment of Soft Tissue Sarcoma: A Survey of Current Practice in the United Kingdom. *Sarcoma*. 2007;2007:34128.
11. Greenberg DD, Crawford B. Surveillance Strategies for Sarcoma: Results of a Survey of Members of the Musculoskeletal Tumor Society. *Sarcoma*. 2016;2016:8289509.
12. Ries Z, Gibbs CP, Jr., Scarborough MT, Miller BJ. Pulmonary Surveillance Strategies Following Sarcoma Excision Vary Among Orthopedic Oncologists: A Survey of the Musculoskeletal Tumor Society. *The Iowa orthopaedic journal*. 2016;36:109-16.
13. von Mehren M, Randall RL, Benjamin RS, Boles S, Bui MM, Ganjoo KN, et al. Soft Tissue Sarcoma, Version 2.2018, NCCN Clinical Practice Guidelines in Oncology. *Journal of the National Comprehensive Cancer Network : JNCCN*. 2018;16(5):536-63.
14. Bozzo A GM, Baldawi H, Simchovich G. Optimal surveillance strategies following curative surgery for extremity sarcoma: A systematic review of randomized control trials. *Open Science Framework*. 2018(May).
15. Puri A, Gulia A, Hawaldar R, Ranganathan P, Badwe RA. Does intensity of surveillance affect survival after surgery for sarcomas? Results of a randomized noninferiority trial. *Clinical orthopaedics and related research*. 2014;472(5):1568-75.
16. Puri A, Ranganathan P, Gulia A, Crasto S, Hawaldar R, Badwe RA. Does a less intensive surveillance protocol affect the survival of patients after treatment of a sarcoma of the limb? updated results of the randomized TOSS study. *The bone & joint journal*. 2018;100-B(2):262-8.
17. Goel A, Christy ME, Virgo KS, Kraybill WG, Johnson FE. Costs of follow-up after potentially curative treatment for extremity soft-tissue sarcoma. *International journal of oncology*. 2004;25(2):429-35.
18. Longo CJ, Deber R, Fitch M, Williams AP, D'Souza D. An examination of cancer patients' monthly 'out-of-pocket' costs in Ontario, Canada. *European journal of cancer care*. 2007;16(6):500-7.
19. Hopkins RB, Goeree R, Longo CJ. Estimating the national wage loss from cancer in Canada. *Current oncology*. 2010;17(2):40-9.
20. Nipp RD, Zullig LL, Samsa G, Peppercorn JM, Schrag D, Taylor DH, Jr., et al. Identifying cancer patients who alter care or lifestyle due to treatment-related financial distress. *Psycho-oncology*. 2016;25(6):719-25.



- 1  
2  
3  
4  
5  
6  
7  
8  
9  
10  
11  
12  
13  
14  
15  
16  
17  
18  
19  
20  
21  
22  
23  
24  
25  
26  
27  
28  
29  
30  
31  
32  
33  
34  
35  
36  
37  
38  
39  
40  
41  
42  
43  
44  
45  
46  
47  
48
21. Thompson CA, Charlson ME, Schenkein E, Wells MT, Furman RR, Elstrom R, et al. Surveillance CT scans are a source of anxiety and fear of recurrence in long-term lymphoma survivors. *Annals of oncology : official journal of the European Society for Medical Oncology*. 2010;21(11):2262-6.
22. Thomas S, Glynn-Jones R, Chait I. Is it worth the wait? A survey of patients' satisfaction with an oncology outpatient clinic. *European journal of cancer care*. 1997;6(1):50-8.
23. Brenner DJ, Hall EJ. Computed tomography--an increasing source of radiation exposure. *The New England journal of medicine*. 2007;357(22):2277-84.
24. Schneider PJ, Evaniew N, McKay P, Ghert M. Moving Forward Through Consensus: A Modified Delphi Approach to Determine the Top Research Priorities in Orthopaedic Oncology. *Clinical orthopaedics and related research*. 2017;475(12):3044-55.
25. Freidlin B, Korn EL. Two-by-Two Factorial Cancer Treatment Trials: Is Sufficient Attention Being Paid to Possible Interactions? *Journal of the National Cancer Institute*. 2017;109(9).
26. Investigators P. Prophylactic antibiotic regimens in tumour surgery (PARITY): a pilot multicentre randomised controlled trial. *Bone & joint research*. 2015;4(9):154-62.
27. Zelle BA, Bhandari M, Sanchez AI, Probst C, Pape HC. Loss of follow-up in orthopaedic trauma: is 80% follow-up still acceptable? *Journal of orthopaedic trauma*. 2013;27(3):177-81.
28. Thabane L, Ma J, Chu R, Cheng J, Ismaila A, Rios LP, et al. A tutorial on pilot studies: the what, why and how. *BMC medical research methodology*. 2010;10:1.
29. Ellis LM, Bernstein DS, Voest EE, Berlin JD, Sargent D, Cortazar P, et al. American Society of Clinical Oncology perspective: Raising the bar for clinical trials by defining clinically meaningful outcomes. *Journal of clinical oncology : official journal of the American Society of Clinical Oncology*. 2014;32(12):1277-80.
- 49  
50  
51  
52  
53  
54  
55  
56  
57  
58  
59  
60

## Figure legend

Figure 1. Study flow diagram

## Data statement

1  
2  
3 All data from this work will be maintained in security and confidentiality at the Methods Centre  
4  
5 at McMaster University. Access to additional unpublished data will be reviewed on a case-by-  
6  
7 case basis and will accord with the guidelines of our local institutional research ethics board.  
8  
9

## 10 11 12 **Authors' contributions**

- 13  
14 • Substantial contributions to the conception or design of the work; or the acquisition,  
15 analysis, or interpretation of data for the work: Michelle Ghert; Mohit Bhandari;  
16 Anthony Bozzo; P.D. Sander Dijkstra; Anthony Griffin; Robert Grimer; James Hayden;  
17 Arlene Manherz; Karim Masrouha; Paula McKay; Benjamin Miller; Naveen Parasu; Ajay  
18 Puri; R. Lor Randall; Patricia Schneider; Sheila Sprague; Nina Szpakowski; Lehana  
19 Thabane; Robert Turcotte; Roberto Vélez; David Wilson; Kevin Zbuk; Gordon Guyatt
- 20 • Drafting the work: Michelle Ghert, Patricia Schneider, and Karim Masrouha
- 21 • Revising it critically for important intellectual content: Michelle Ghert; Mohit Bhandari;  
22 Anthony Bozzo; P.D. Sander Dijkstra; Anthony Griffin; Robert Grimer; James Hayden;  
23 Arlene Manherz; Karim Masrouha; Paula McKay; Benjamin Miller; Naveen Parasu; Ajay  
24 Puri; R. Lor Randall; Patricia Schneider; Sheila Sprague; Nina Szpakowski; Lehana  
25 Thabane; Robert Turcotte; Roberto Vélez; David Wilson; Kevin Zbuk; Gordon Guyatt
- 26 • Final approval of the version to be published: Michelle Ghert; Mohit Bhandari; Anthony  
27 Bozzo; P.D. Sander Dijkstra; Anthony Griffin; Robert Grimer; James Hayden; Arlene  
28 Manherz; Karim Masrouha; Paula McKay; Benjamin Miller; Naveen Parasu; Ajay Puri;  
29 R. Lor Randall; Patricia Schneider; Sheila Sprague; Nina Szpakowski; Lehana Thabane;  
30 Robert Turcotte; Roberto Vélez; David Wilson; Kevin Zbuk; Gordon Guyatt
- 31 • Agreement to be accountable for all aspects of the work in ensuring that questions related  
32 to the accuracy or integrity of any part of the work are appropriately investigated and  
33 resolved: Michelle Ghert; Mohit Bhandari; Anthony Bozzo; P.D. Sander Dijkstra;  
34 Anthony Griffin; Robert Grimer; James Hayden; Arlene Manherz; Karim Masrouha;  
35 Paula McKay; Benjamin Miller; Naveen Parasu; Ajay Puri; R. Lor Randall; Patricia  
36 Schneider; Sheila Sprague; Nina Szpakowski; Lehana Thabane; Robert Turcotte; Roberto  
37 Vélez; David Wilson; Kevin Zbuk; Gordon Guyatt

## 38 39 40 41 42 43 44 45 46 **Funding**

47  
48 This research is supported by funding through the Hamilton Academic Health Science  
49  
50 Organization (HAHSO) Innovation Grant.  
51  
52

## 53 54 55 56 **Competing interests statement**

1  
2  
3  
4  
5  
6  
7  
8  
9  
10  
11  
12  
13  
14  
15  
16  
17  
18  
19  
20  
21  
22  
23  
24  
25  
26  
27  
28  
29  
30  
31  
32  
33  
34  
35  
36  
37  
38  
39  
40  
41  
42  
43  
44  
45  
46  
47  
48  
49  
50  
51  
52  
53  
54  
55  
56  
57  
58  
59  
60

Dr. Bhandari, Dr. Ghert, Dr. Randall, and Dr. Hayden report personal fees from consultancy and/or royalties outside the submitted work.

**Word count**

4,785

For peer review only

1  
2  
3  
4  
5  
6  
7  
8  
9  
10  
11  
12  
13  
14  
15  
16  
17  
18  
19  
20  
21  
22  
23  
24  
25  
26  
27  
28  
29  
30  
31  
32  
33  
34  
35  
36  
37  
38  
39  
40  
41  
42  
43  
44  
45  
46  
47  
48  
49  
50  
51  
52  
53  
54  
55  
56  
57  
58  
59  
60

**Figure 1.**

M = month; CXR = chest X-ray; CT = computed tomography

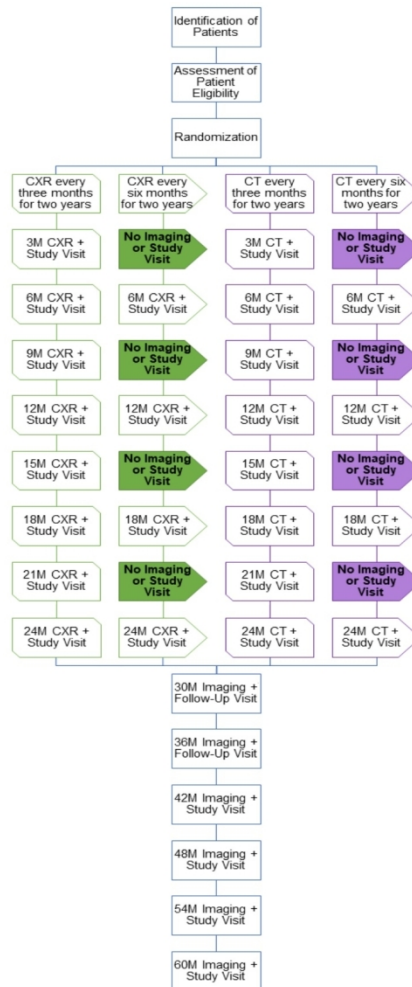

Study flow diagram

146x146mm (300 x 300 DPI)

# Reporting checklist for protocol of a clinical trial.

Based on the SPIRIT guidelines.

## Instructions to authors

Complete this checklist by entering the page numbers from your manuscript where readers will find each of the items listed below.

Your article may not currently address all the items on the checklist. Please modify your text to include the missing information. If you are certain that an item does not apply, please write "n/a" and provide a short explanation.

Upload your completed checklist as an extra file when you submit to a journal.

In your methods section, say that you used the SPIRIT reporting guidelines, and cite them as:

Chan A-W, Tetzlaff JM, Altman DG, Laupacis A, Gøtzsche PC, Krleža-Jerić K, Hróbjartsson A, Mann H, Dickersin K, Berlin J, Doré C, Parulekar W, Summerskill W, Groves T, Schulz K, Sox H, Rockhold FW, Rennie D, Moher D. SPIRIT 2013 Statement: Defining standard protocol items for clinical trials. *Ann Intern Med.* 2013;158(3):200-207

Page

Number

Reporting Item

|      |                                                             |   |
|------|-------------------------------------------------------------|---|
| T #  | Descriptive title identifying the study design, population, | 1 |
| it 1 | interventions, and, if applicable, trial acronym            |   |
| l    |                                                             |   |
| e    |                                                             |   |

1 T # Trial identifier and registry name. If not yet registered, N/A  
2  
3 ri 2 name of intended registry  
4 a a  
5 l  
6 r  
7 e  
8 g  
9 is  
10 tr  
11 a  
12 ti  
13 o  
14 n  
15  
16  
17  
18  
19  
20  
21

22 T # All items from the World Health Organization Trial N/A  
23 ri 2 Registration Data Set  
24 a b  
25 l  
26 r  
27 e  
28 g  
29 is  
30 tr  
31 a  
32 ti  
33 o  
34 n  
35 :  
36 d  
37 a  
38 t  
39 a  
40 s  
41 e  
42 t  
43  
44  
45  
46  
47  
48  
49  
50  
51  
52  
53  
54  
55  
56  
57  
58  
59  
60

1 P # Date and version identifier 1  
 2  
 3 r 3  
 4 o  
 5 t  
 6 o  
 7 c  
 8 o  
 9 l  
 10 l  
 11 v  
 12 e  
 13 r  
 14 si  
 15 o  
 16 n

23 F # Sources and types of financial, material, and other support HAHSO  
 24 u 4  
 25 n  
 26 d  
 27 i  
 28 n  
 29 g  
 30  
 31  
 32  
 33  
 34  
 35  
 36  
 37  
 38  
 39  
 40  
 41  
 42  
 43  
 44  
 45  
 46  
 47  
 48  
 49  
 50  
 51  
 52  
 53  
 54  
 55  
 56  
 57  
 58  
 59  
 60

1 R # Names, affiliations, and roles of protocol contributors 2,3,28  
2  
3 o 5  
4 l a  
5  
6 e  
7 s  
8 a  
9 n  
10 d  
11 r  
12 e  
13 s  
14 p  
15 o  
16 n  
17 si  
18 b  
19 il  
20 it  
21 i  
22 e  
23 s:  
24 c  
25 o  
26 n  
27 tr  
28 i  
29 b  
30 u  
31 t  
32 o  
33 r  
34 s  
35 h  
36 i  
37 p  
38  
39  
40  
41  
42  
43  
44  
45  
46  
47  
48  
49  
50  
51  
52  
53  
54  
55  
56  
57  
58  
59  
60



|    |     |                                                    |     |
|----|-----|----------------------------------------------------|-----|
| 1  | R # | Name and contact information for the trial sponsor | N/A |
| 2  |     |                                                    |     |
| 3  | o   | 5                                                  |     |
| 4  | l   | b                                                  |     |
| 5  |     |                                                    |     |
| 6  | e   |                                                    |     |
| 7  |     |                                                    |     |
| 8  | s   |                                                    |     |
| 9  |     |                                                    |     |
| 10 | a   |                                                    |     |
| 11 |     |                                                    |     |
| 12 | n   |                                                    |     |
| 13 |     |                                                    |     |
| 14 | d   |                                                    |     |
| 15 |     |                                                    |     |
| 16 | r   |                                                    |     |
| 17 |     |                                                    |     |
| 18 | e   |                                                    |     |
| 19 |     |                                                    |     |
| 20 | s   |                                                    |     |
| 21 |     |                                                    |     |
| 22 | p   |                                                    |     |
| 23 |     |                                                    |     |
| 24 | o   |                                                    |     |
| 25 |     |                                                    |     |
| 26 | n   |                                                    |     |
| 27 |     |                                                    |     |
| 28 | si  |                                                    |     |
| 29 |     |                                                    |     |
| 30 | b   |                                                    |     |
| 31 |     |                                                    |     |
| 32 | il  |                                                    |     |
| 33 |     |                                                    |     |
| 34 | it  |                                                    |     |
| 35 |     |                                                    |     |
| 36 | i   |                                                    |     |
| 37 |     |                                                    |     |
| 38 | e   |                                                    |     |
| 39 |     |                                                    |     |
| 40 | s:  |                                                    |     |
| 41 |     |                                                    |     |
| 42 | s   |                                                    |     |
| 43 |     |                                                    |     |
| 44 | p   |                                                    |     |
| 45 |     |                                                    |     |
| 46 | o   |                                                    |     |
| 47 |     |                                                    |     |
| 48 | n   |                                                    |     |
| 49 |     |                                                    |     |
| 50 | s   |                                                    |     |
| 51 |     |                                                    |     |
| 52 | o   |                                                    |     |
| 53 |     |                                                    |     |
| 54 | r   |                                                    |     |
| 55 |     |                                                    |     |
| 56 | c   |                                                    |     |
| 57 |     |                                                    |     |
| 58 | o   |                                                    |     |
| 59 |     |                                                    |     |
| 60 | n   |                                                    |     |

o  
r  
m  
a  
t  
i  
o  
n

1  
2  
3  
4  
5  
6  
7  
8  
9  
10  
11  
12  
13  
14  
15  
16  
17  
18  
19  
20  
21  
22  
23  
24  
25  
26  
27  
28  
29  
30  
31  
32  
33  
34  
35  
36  
37  
38  
39  
40  
41  
42  
43  
44  
45  
46  
47  
48  
49  
50  
51  
52  
53  
54  
55  
56  
57  
58  
59  
60

1 R # Role of study sponsor and funders, if any, in study design; N/A  
2  
3 o 5 collection, management, analysis, and interpretation of  
4 l c data; writing of the report; and the decision to submit the  
5 e report for publication, including whether they will have  
6 s ultimate authority over any of these activities  
7  
8 a  
9  
10 n  
11 d  
12 r  
13 e  
14 s  
15 p  
16 o  
17 n  
18 si  
19 b  
20 il  
21 it  
22 i  
23 e  
24 s:  
25 s  
26 p  
27 o  
28 n  
29 s  
30 o  
31 r  
32 a  
33 n  
34 d  
35 f  
36 u  
37 n  
38 d  
39 e  
40 r

1 R # Composition, roles, and responsibilities of the coordinating 18, 24, 25  
2  
3 o 5 centre, steering committee, endpoint adjudication  
4 l d committee, data management team, and other individuals or  
5  
6 e groups overseeing the trial, if applicable (see Item 21a for  
7  
8 s data monitoring committee)  
9  
10 a  
11 n  
12 d  
13 r  
14 e  
15 s  
16  
17 p  
18  
19 o  
20  
21 n  
22 si  
23 b  
24 il  
25 it  
26 i  
27 e  
28 s:  
29 c  
30 o  
31 m  
32 m  
33 it  
34 t  
35 e  
36 e  
37 s

6, 7, 8

B # Description of research question and justification for  
a 6 undertaking the trial, including summary of relevant studies  
c a (published and unpublished) examining benefits and harms  
k for each intervention

g  
r  
o  
u  
n  
d  
a  
n  
d  
r  
a  
t  
i  
o  
n  
a  
l  
e

6

1 B # Explanation for choice of comparators

2 a 6

3 c b

4 k

5 g

6 r

7 o

8 u

9 n

10 d

11 a

12 n

13 d

14 r

15 a

16 ti

17 o

18 n

19 a

20 l

21 e

22 :

23 c

24 h

25 o

26 i

27 c

28 e

29 o

30 f

31 c

32 o

33 m

34 p

35 a

36 r

37 a

38 t

39

40

41

1 O  
2 r  
3  
4 s  
5  
6  
7  
8  
9  
10  
11  
12  
13  
14  
15  
16  
17  
18  
19  
20  
21  
22  
23  
24  
25  
26  
27  
28  
29  
30  
31  
32  
33  
34  
35  
36  
37  
38  
39  
40  
41  
42  
43  
44  
45  
46  
47  
48  
49  
50  
51  
52  
53  
54  
55  
56  
57  
58  
59  
60

|    |     |                                                                   |           |
|----|-----|-------------------------------------------------------------------|-----------|
| 1  | O # | Specific objectives or hypotheses                                 | 9, 10, 11 |
| 2  |     |                                                                   |           |
| 3  | b   | 7                                                                 |           |
| 4  | j   |                                                                   |           |
| 5  | e   |                                                                   |           |
| 6  | c   |                                                                   |           |
| 7  | t   |                                                                   |           |
| 8  | i   |                                                                   |           |
| 9  | v   |                                                                   |           |
| 10 | e   |                                                                   |           |
| 11 | s   |                                                                   |           |
| 12 |     |                                                                   |           |
| 13 |     |                                                                   |           |
| 14 |     |                                                                   |           |
| 15 |     |                                                                   |           |
| 16 | T # | Description of trial design including type of trial (eg,          | 9         |
| 17 |     |                                                                   |           |
| 18 | ri  | 8 parallel group, crossover, factorial, single group), allocation |           |
| 19 | a   | ratio, and framework (eg, superiority, equivalence, non-          |           |
| 20 |     | inferiority, exploratory)                                         |           |
| 21 | l   |                                                                   |           |
| 22 | d   |                                                                   |           |
| 23 | e   |                                                                   |           |
| 24 | si  |                                                                   |           |
| 25 | g   |                                                                   |           |
| 26 | n   |                                                                   |           |
| 27 |     |                                                                   |           |
| 28 |     |                                                                   |           |
| 29 |     |                                                                   |           |
| 30 |     |                                                                   |           |
| 31 | S # | Description of study settings (eg, community clinic,              | 11        |
| 32 |     |                                                                   |           |
| 33 | t   | 9 academic hospital) and list of countries where data will be     |           |
| 34 | u   | collected. Reference to where list of study sites can be          |           |
| 35 |     | obtained                                                          |           |
| 36 | d   |                                                                   |           |
| 37 | y   |                                                                   |           |
| 38 | s   |                                                                   |           |
| 39 | e   |                                                                   |           |
| 40 | tt  |                                                                   |           |
| 41 | i   |                                                                   |           |
| 42 | n   |                                                                   |           |
| 43 | g   |                                                                   |           |
| 44 |     |                                                                   |           |
| 45 |     |                                                                   |           |
| 46 |     |                                                                   |           |
| 47 |     |                                                                   |           |
| 48 |     |                                                                   |           |
| 49 |     |                                                                   |           |
| 50 |     |                                                                   |           |
| 51 |     |                                                                   |           |
| 52 |     |                                                                   |           |
| 53 |     |                                                                   |           |
| 54 |     |                                                                   |           |
| 55 |     |                                                                   |           |
| 56 |     |                                                                   |           |
| 57 |     |                                                                   |           |
| 58 |     |                                                                   |           |
| 59 |     |                                                                   |           |
| 60 |     |                                                                   |           |



1 E # Inclusion and exclusion criteria for participants. If 12  
2  
3 li 1 applicable, eligibility criteria for study centres and  
4 g 0 individuals who will perform the interventions (eg,  
5  
6 i surgeons, psychotherapists)

7 b  
8  
9 il  
10 it  
11  
12 y  
13 c  
14 ri  
15  
16 t  
17  
18 e  
19 ri  
20  
21 a  
22

23  
24 I # Interventions for each group with sufficient detail to allow 14  
25 n 1 replication, including how and when they will be  
26 t 1 administered

28 e a  
29  
30 r  
31 v  
32  
33 e  
34 n  
35  
36 ti  
37 o  
38  
39 n  
40 s:  
41 d  
42  
43 e  
44  
45 s  
46 c  
47 ri  
48  
49 p  
50 ti  
51  
52 o  
53  
54 n  
55  
56  
57  
58  
59  
60

1 I # Criteria for discontinuing or modifying allocated N/A  
2  
3 n 1 interventions for a given trial participant (eg, drug dose  
4 t 1 change in response to harms, participant request, or  
5 e b improving / worsening disease)  
6  
7 r  
8 v  
9  
10 e  
11 n  
12 ti  
13 o  
14 n  
15 s:  
16 m  
17 o  
18 d  
19 if  
20 i  
21 c  
22 a  
23 ti  
24 o  
25 n  
26 s  
27  
28  
29  
30  
31  
32  
33  
34  
35  
36  
37  
38  
39  
40  
41  
42  
43  
44  
45  
46  
47  
48  
49  
50  
51  
52  
53  
54  
55  
56  
57  
58  
59  
60

1 I # Strategies to improve adherence to intervention protocols, 19, 20  
2  
3 n 1 and any procedures for monitoring adherence (eg, drug  
4 t 1 tablet return; laboratory tests)  
5  
6 e c  
7  
8 r  
9 v  
10 e  
11 n  
12 n  
13 ti  
14 o  
15 n  
16 s:  
17 a  
18 d  
19 h  
20 e  
21 r  
22 a  
23 n  
24 c  
25 e  
26  
27  
28  
29  
30  
31  
32  
33  
34  
35  
36  
37  
38  
39  
40  
41  
42  
43  
44  
45  
46  
47  
48  
49  
50  
51  
52  
53  
54  
55  
56  
57  
58  
59  
60

12, 13

1 I # Relevant concomitant care and interventions that are  
 2 n 1 permitted or prohibited during the trial  
 3 t 1  
 4 e d  
 5 r  
 6 v  
 7 e  
 8 n  
 9 ti  
 10 o  
 11 n  
 12 s:  
 13 c  
 14 o  
 15 n  
 16 c  
 17 o  
 18 m  
 19 it  
 20 a  
 21 n  
 22 t  
 23 c  
 24 a  
 25 r  
 26 e

41 O # Primary, secondary, and other outcomes, including the See note 1  
 42 u 1 specific measurement variable (eg, systolic blood pressure),  
 43 t 2 analysis metric (eg, change from baseline, final value, time  
 44 c to event), method of aggregation (eg, median, proportion),  
 45 o and time point for each outcome. Explanation of the clinical  
 46 m relevance of chosen efficacy and harm outcomes is strongly  
 47 e recommended  
 48 s

|    |    |   |                                                            |        |
|----|----|---|------------------------------------------------------------|--------|
| 1  | P  | # | Time schedule of enrolment, interventions (including any   | 24     |
| 2  |    |   |                                                            |        |
| 3  | a  | 1 | run-ins and washouts), assessments, and visits for         |        |
| 4  | rt | 3 | participants. A schematic diagram is highly recommended    |        |
| 5  |    |   | (see Figure)                                               |        |
| 6  | i  |   |                                                            |        |
| 7  | c  |   |                                                            |        |
| 8  |    |   |                                                            |        |
| 9  | i  |   |                                                            |        |
| 10 |    |   |                                                            |        |
| 11 | P  |   |                                                            |        |
| 12 | a  |   |                                                            |        |
| 13 | n  |   |                                                            |        |
| 14 |    |   |                                                            |        |
| 15 | t  |   |                                                            |        |
| 16 | ti |   |                                                            |        |
| 17 |    |   |                                                            |        |
| 18 | m  |   |                                                            |        |
| 19 | e  |   |                                                            |        |
| 20 | li |   |                                                            |        |
| 21 |    |   |                                                            |        |
| 22 | n  |   |                                                            |        |
| 23 |    |   |                                                            |        |
| 24 | e  |   |                                                            |        |
| 25 |    |   |                                                            |        |
| 26 |    |   |                                                            |        |
| 27 | S  | # | Estimated number of participants needed to achieve study   | 20, 21 |
| 28 | a  | 1 | objectives and how it was determined, including clinical   |        |
| 29 |    |   |                                                            |        |
| 30 | m  | 4 | and statistical assumptions supporting any sample size     |        |
| 31 | p  |   | calculations                                               |        |
| 32 |    |   |                                                            |        |
| 33 | l  |   |                                                            |        |
| 34 | e  |   |                                                            |        |
| 35 |    |   |                                                            |        |
| 36 | si |   |                                                            |        |
| 37 | z  |   |                                                            |        |
| 38 |    |   |                                                            |        |
| 39 | e  |   |                                                            |        |
| 40 |    |   |                                                            |        |
| 41 |    |   |                                                            |        |
| 42 | R  | # | Strategies for achieving adequate participant enrolment to | 13, 14 |
| 43 | e  | 1 | reach target sample size                                   |        |
| 44 |    |   |                                                            |        |
| 45 | c  | 5 |                                                            |        |
| 46 | r  |   |                                                            |        |
| 47 |    |   |                                                            |        |
| 48 | u  |   |                                                            |        |
| 49 | it |   |                                                            |        |
| 50 |    |   |                                                            |        |
| 51 | m  |   |                                                            |        |
| 52 | e  |   |                                                            |        |
| 53 |    |   |                                                            |        |
| 54 | n  |   |                                                            |        |
| 55 | t  |   |                                                            |        |
| 56 |    |   |                                                            |        |
| 57 |    |   |                                                            |        |
| 58 |    |   |                                                            |        |
| 59 |    |   |                                                            |        |
| 60 |    |   |                                                            |        |

1 A # Method of generating the allocation sequence (eg,  
2 ll 1 computer-generated random numbers), and list of any  
3 o 6 factors for stratification. To reduce predictability of a  
4 c a random sequence, details of any planned restriction (eg,  
5 a blocking) should be provided in a separate document that is  
6 ti unavailable to those who enrol participants or assign  
7 o interventions  
8  
9  
10  
11  
12  
13  
14  
15  
16  
17  
18  
19  
20  
21  
22  
23  
24  
25  
26  
27  
28  
29  
30  
31  
32  
33  
34  
35  
36  
37  
38  
39  
40  
41  
42  
43  
44  
45  
46  
47  
48  
49  
50  
51  
52  
53  
54  
55  
56  
57  
58  
59  
60

1 A # Mechanism of implementing the allocation sequence (eg,  
2 ll 1 central telephone; sequentially numbered, opaque, sealed  
3 o 6 envelopes), describing any steps to conceal the sequence  
4 c b until interventions are assigned  
5  
6 a  
7 ti  
8 o  
9 n  
10 c  
11 o  
12 n  
13 c  
14 o  
15 n  
16 c  
17 e  
18 a  
19 l  
20 m  
21 e  
22 n  
23 t  
24 m  
25 e  
26 c  
27 h  
28 a  
29 n  
30 is  
31 m

1 A # Who will generate the allocation sequence, who will enrol 14  
2 ll 1 participants, and who will assign participants to  
3 o 6 interventions

4 c c  
5  
6 a  
7 ti  
8 o  
9 n  
10 .  
11 i  
12 m  
13 p  
14 l  
15 e  
16 m  
17 e  
18 n  
19 t  
20 a  
21 ti  
22 o  
23 n

35 B # Who will be blinded after assignment to interventions (eg, 19  
36 li 1 trial participants, care providers, outcome assessors, data  
37 n 7 analysts), and how

40 d a  
41 i  
42 n  
43 g  
44 (  
45 m  
46 a  
47 s  
48 k  
49 i  
50 n  
51  
52  
53  
54  
55  
56  
57  
58  
59  
60



1 g  
2 )  
3  
4  
5  
6  
7  
8  
9  
10  
11  
12  
13  
14  
15  
16  
17  
18  
19  
20  
21  
22  
23  
24  
25  
26  
27  
28  
29  
30  
31  
32  
33  
34  
35  
36  
37  
38  
39  
40  
41  
42  
43  
44  
45  
46  
47  
48  
49  
50  
51  
52  
53  
54  
55  
56  
57  
58  
59  
60

1 B # If blinded, circumstances under which unblinding is N/A  
2  
3 li 1 permissible, and procedure for revealing a participant's  
4 n 7 allocated intervention during the trial  
5  
6 d b  
7  
8 i  
9 n  
10 g  
11 (  
12 m  
13 a  
14 s  
15 k  
16 i  
17 n  
18 g  
19 ):  
20 e  
21 m  
22 e  
23 r  
24 g  
25 e  
26 n  
27 c  
28 y  
29 u  
30 n  
31 b  
32 li  
33 n  
34 d  
35 i  
36 n  
37 g

N/A

1 D # Plans for assessment and collection of outcome, baseline,  
2  
3 a 1 and other trial data, including any related processes to  
4 t 8 promote data quality (eg, duplicate measurements, training  
5 a a of assessors) and a description of study instruments (eg,  
6 c questionnaires, laboratory tests) along with their reliability  
7 o and validity, if known. Reference to where data collection  
8 ll forms can be found, if not in the protocol  
9  
10  
11 e  
12  
13 c  
14 ti  
15 o  
16 n  
17 p  
18 l  
19 a  
20 n  
21  
22  
23  
24  
25  
26  
27  
28  
29  
30  
31  
32  
33  
34  
35  
36  
37  
38  
39  
40  
41  
42  
43  
44  
45  
46  
47  
48  
49  
50  
51  
52  
53  
54  
55  
56  
57  
58  
59  
60

1 D # Plans to promote participant retention and complete follow- 19  
2 a 1 up, including list of any outcome data to be collected for  
3 t 8 participants who discontinue or deviate from intervention  
4 a b protocols  
5  
6 c  
7  
8 o  
9  
10 ll  
11  
12 e  
13  
14 c  
15 ti  
16 o  
17  
18 n  
19 p  
20 l  
21 a  
22 n  
23 :  
24 r  
25 e  
26 t  
27 e  
28 n  
29 ti  
30 o  
31 n  
32  
33  
34  
35  
36  
37  
38  
39  
40  
41  
42  
43  
44  
45  
46  
47  
48  
49  
50  
51  
52  
53  
54  
55  
56  
57  
58  
59  
60

1 D # Plans for data entry, coding, security, and storage, including 24, 25  
2  
3 a 1 any related processes to promote data quality (eg, double  
4 t 9 data entry; range checks for data values). Reference to  
5  
6 a where details of data management procedures can be found,  
7 m if not in the protocol  
8  
9 a  
10 n  
11 a  
12 g  
13 e  
14 m  
15 e  
16 n  
17 t

23  
24 S # Statistical methods for analysing primary and secondary 22  
25 t 2 outcomes. Reference to where other details of the statistical  
26 a 0 analysis plan can be found, if not in the protocol  
27  
28 ti a  
29  
30 st  
31 i  
32 c  
33 s:  
34 o  
35 u  
36 t  
37 c  
38 o  
39 m  
40 e  
41 s

|    |    |   |                                                       |     |
|----|----|---|-------------------------------------------------------|-----|
| 1  | S  | # | Methods for any additional analyses (eg, subgroup and | N/A |
| 2  |    |   |                                                       |     |
| 3  | t  | 2 | adjusted analyses)                                    |     |
| 4  | a  | 0 |                                                       |     |
| 5  |    |   |                                                       |     |
| 6  | t  | i | b                                                     |     |
| 7  |    |   |                                                       |     |
| 8  | s  | t |                                                       |     |
| 9  |    |   |                                                       |     |
| 10 | i  |   |                                                       |     |
| 11 |    |   |                                                       |     |
| 12 | c  |   |                                                       |     |
| 13 |    |   |                                                       |     |
| 14 | s: |   |                                                       |     |
| 15 |    |   |                                                       |     |
| 16 | a  |   |                                                       |     |
| 17 |    |   |                                                       |     |
| 18 | d  |   |                                                       |     |
| 19 |    |   |                                                       |     |
| 20 | d  |   |                                                       |     |
| 21 |    |   |                                                       |     |
| 22 | i  |   |                                                       |     |
| 23 |    |   |                                                       |     |
| 24 | o  |   |                                                       |     |
| 25 |    |   |                                                       |     |
| 26 | n  |   |                                                       |     |
| 27 |    |   |                                                       |     |
| 28 | a  |   |                                                       |     |
| 29 |    |   |                                                       |     |
| 30 | l  |   |                                                       |     |
| 31 |    |   |                                                       |     |
| 32 | a  |   |                                                       |     |
| 33 |    |   |                                                       |     |
| 34 | n  |   |                                                       |     |
| 35 |    |   |                                                       |     |
| 36 | a  |   |                                                       |     |
| 37 |    |   |                                                       |     |
| 38 | l  |   |                                                       |     |
| 39 |    |   |                                                       |     |
| 40 | y  |   |                                                       |     |
| 41 |    |   |                                                       |     |
| 42 | s  |   |                                                       |     |
| 43 |    |   |                                                       |     |
| 44 | e  |   |                                                       |     |
| 45 |    |   |                                                       |     |
| 46 | s  |   |                                                       |     |
| 47 |    |   |                                                       |     |
| 48 |    |   |                                                       |     |
| 49 |    |   |                                                       |     |
| 50 |    |   |                                                       |     |
| 51 |    |   |                                                       |     |
| 52 |    |   |                                                       |     |
| 53 |    |   |                                                       |     |
| 54 |    |   |                                                       |     |
| 55 |    |   |                                                       |     |
| 56 |    |   |                                                       |     |
| 57 |    |   |                                                       |     |
| 58 |    |   |                                                       |     |
| 59 |    |   |                                                       |     |
| 60 |    |   |                                                       |     |

1 S # Definition of analysis population relating to protocol non- N/A  
2 t 2 adherence (eg, as randomised analysis), and any statistical  
3 a 0 methods to handle missing data (eg, multiple imputation)  
4 ti c  
5  
6 st  
7  
8 i  
9  
10 c  
11 s:  
12 a  
13 n  
14 a  
15 l  
16 y  
17 si  
18 s  
19 p  
20 o  
21 p  
22 u  
23 l  
24 a  
25 ti  
26 o  
27 n  
28 a  
29 n  
30 d  
31 m  
32 is  
33 si  
34 n  
35 g  
36 d  
37 a  
38 t  
39 a  
40  
41  
42  
43  
44  
45  
46  
47  
48  
49  
50  
51  
52  
53  
54  
55  
56  
57  
58  
59  
60

24, 25

1 D # Composition of data monitoring committee (DMC);  
2  
3 a 2 summary of its role and reporting structure; statement of  
4 t 1 whether it is independent from the sponsor and competing  
5 a a interests; and reference to where further details about its  
6 m charter can be found, if not in the protocol. Alternatively,  
7 o an explanation of why a DMC is not needed  
8  
9  
10  
11  
12  
13  
14  
15  
16  
17  
18  
19  
20  
21  
22  
23  
24  
25  
26  
27  
28  
29  
30  
31  
32  
33  
34  
35  
36  
37  
38  
39  
40  
41  
42  
43  
44  
45  
46  
47  
48  
49  
50  
51  
52  
53  
54  
55  
56  
57  
58  
59  
60



|    |     |                                                              |        |
|----|-----|--------------------------------------------------------------|--------|
| 1  | D # | Description of any interim analyses and stopping             | N/A    |
| 2  |     |                                                              |        |
| 3  | a 2 | guidelines, including who will have access to these interim  |        |
| 4  | t 1 | results and make the final decision to terminate the trial   |        |
| 5  |     |                                                              |        |
| 6  | a b |                                                              |        |
| 7  | m   |                                                              |        |
| 8  |     |                                                              |        |
| 9  | o   |                                                              |        |
| 10 | n   |                                                              |        |
| 11 | it  |                                                              |        |
| 12 |     |                                                              |        |
| 13 | o   |                                                              |        |
| 14 | ri  |                                                              |        |
| 15 | n   |                                                              |        |
| 16 | g   |                                                              |        |
| 17 | :   |                                                              |        |
| 18 | i   |                                                              |        |
| 19 | n   |                                                              |        |
| 20 | t   |                                                              |        |
| 21 | e   |                                                              |        |
| 22 | ri  |                                                              |        |
| 23 | m   |                                                              |        |
| 24 | a   |                                                              |        |
| 25 | n   |                                                              |        |
| 26 | a   |                                                              |        |
| 27 | l   |                                                              |        |
| 28 | y   |                                                              |        |
| 29 | si  |                                                              |        |
| 30 | s   |                                                              |        |
| 31 |     |                                                              |        |
| 32 |     |                                                              |        |
| 33 |     |                                                              |        |
| 34 |     |                                                              |        |
| 35 |     |                                                              |        |
| 36 |     |                                                              |        |
| 37 |     |                                                              |        |
| 38 |     |                                                              |        |
| 39 |     |                                                              |        |
| 40 |     |                                                              |        |
| 41 | H # | Plans for collecting, assessing, reporting, and managing     | 24, 25 |
| 42 | a 2 | solicited and spontaneously reported adverse events and      |        |
| 43 | r 2 | other unintended effects of trial interventions or trial     |        |
| 44 | m   | conduct                                                      |        |
| 45 |     |                                                              |        |
| 46 | s   |                                                              |        |
| 47 |     |                                                              |        |
| 48 |     |                                                              |        |
| 49 |     |                                                              |        |
| 50 | A # | Frequency and procedures for auditing trial conduct, if any, | 24, 25 |
| 51 | u 2 | and whether the process will be independent from             |        |
| 52 | d 3 | investigators and the sponsor                                |        |
| 53 |     |                                                              |        |
| 54 | it  |                                                              |        |
| 55 | i   |                                                              |        |
| 56 |     |                                                              |        |
| 57 |     |                                                              |        |
| 58 |     |                                                              |        |
| 59 |     |                                                              |        |
| 60 |     |                                                              |        |

1 n  
2 g  
3  
4  
5  
6  
7  
8  
9  
10  
11 R # Plans for seeking research ethics committee / institutional 23, 24  
12 e 2 review board (REC / IRB) approval  
13  
14 s 4  
15 e  
16 a  
17 r  
18 c  
19 h  
20 e  
21 t  
22 h  
23 i  
24 c  
25 s  
26 a  
27 p  
28 p  
29 r  
30 o  
31 v  
32 a  
33 l  
34  
35  
36  
37  
38  
39  
40  
41  
42  
43  
44  
45  
46  
47  
48  
49  
50  
51  
52  
53  
54  
55  
56  
57  
58  
59  
60

|    |    |   |                                                              |        |
|----|----|---|--------------------------------------------------------------|--------|
| 1  | P  | # | Plans for communicating important protocol modifications     | N/A    |
| 2  |    |   |                                                              |        |
| 3  | r  | 2 | (eg, changes to eligibility criteria, outcomes, analyses) to |        |
| 4  |    |   |                                                              |        |
| 5  | o  | 5 | relevant parties (eg, investigators, REC / IRBs, trial       |        |
| 6  | t  |   | participants, trial registries, journals, regulators)        |        |
| 7  |    |   |                                                              |        |
| 8  | o  |   |                                                              |        |
| 9  | c  |   |                                                              |        |
| 10 |    |   |                                                              |        |
| 11 | o  |   |                                                              |        |
| 12 | l  |   |                                                              |        |
| 13 |    |   |                                                              |        |
| 14 | a  |   |                                                              |        |
| 15 | m  |   |                                                              |        |
| 16 | e  |   |                                                              |        |
| 17 | n  |   |                                                              |        |
| 18 |    |   |                                                              |        |
| 19 | d  |   |                                                              |        |
| 20 |    |   |                                                              |        |
| 21 | m  |   |                                                              |        |
| 22 | e  |   |                                                              |        |
| 23 |    |   |                                                              |        |
| 24 | n  |   |                                                              |        |
| 25 | ts |   |                                                              |        |
| 26 |    |   |                                                              |        |
| 27 |    |   |                                                              |        |
| 28 | C  | # | Who will obtain informed consent or assent from potential    | 13, 14 |
| 29 |    |   |                                                              |        |
| 30 | o  | 2 | trial participants or authorised surrogates, and how (see    |        |
| 31 |    |   |                                                              |        |
| 32 | n  | 6 | Item 32)                                                     |        |
| 33 | s  | a |                                                              |        |
| 34 | e  |   |                                                              |        |
| 35 |    |   |                                                              |        |
| 36 | n  |   |                                                              |        |
| 37 | t  |   |                                                              |        |
| 38 |    |   |                                                              |        |
| 39 | o  |   |                                                              |        |
| 40 |    |   |                                                              |        |
| 41 | r  |   |                                                              |        |
| 42 | a  |   |                                                              |        |
| 43 | s  |   |                                                              |        |
| 44 |    |   |                                                              |        |
| 45 | s  |   |                                                              |        |
| 46 | e  |   |                                                              |        |
| 47 |    |   |                                                              |        |
| 48 | n  |   |                                                              |        |
| 49 | t  |   |                                                              |        |
| 50 |    |   |                                                              |        |
| 51 |    |   |                                                              |        |
| 52 |    |   |                                                              |        |
| 53 |    |   |                                                              |        |
| 54 |    |   |                                                              |        |
| 55 |    |   |                                                              |        |
| 56 |    |   |                                                              |        |
| 57 |    |   |                                                              |        |
| 58 |    |   |                                                              |        |
| 59 |    |   |                                                              |        |
| 60 |    |   |                                                              |        |

1 C # Additional consent provisions for collection and use of N/A  
2  
3 o 2 participant data and biological specimens in ancillary  
4 n 6 studies, if applicable  
5  
6 s b  
7  
8 e  
9  
10 n  
11  
12 t  
13  
14 o  
15  
16 r  
17  
18 a  
19  
20 s  
21  
22 s  
23  
24 e  
25  
26 n  
27  
28 t:  
29  
30 a  
31  
32 n  
33  
34 c  
35  
36 il  
37  
38 l  
39  
40 a  
41  
42 r  
43  
44 y  
45  
46 st  
47  
48 u  
49  
50 d  
51  
52 i  
53  
54 e  
55  
56 s  
57  
58  
59  
60

1 C # How personal information about potential and enrolled 13, 14  
2  
3 o 2 participants will be collected, shared, and maintained in  
4 n 7 order to protect confidentiality before, during, and after the  
5 fi trial  
6  
7 d  
8  
9 e

10 n  
11 ti  
12 a  
13 li  
14 t  
15 y  
16  
17  
18  
19  
20  
21 D # Financial and other competing interests for principal 28  
22 e 2 investigators for the overall trial and each study site  
23 c 8

24 l  
25 a  
26 r  
27 a  
28 ti  
29 o  
30 n  
31 o  
32 f  
33 i  
34 n  
35 t  
36 e  
37 r  
38 e  
39 st  
40 s  
41  
42  
43  
44  
45  
46  
47  
48  
49  
50  
51  
52  
53  
54  
55  
56  
57  
58  
59  
60

1 D # Statement of who will have access to the final trial dataset, N/A  
2  
3 a 2 and disclosure of contractual agreements that limit such  
4 t 9 access for investigators  
5

6 a  
7 a  
8 c  
9 c  
10 c  
11 e  
12 s  
13 s  
14  
15

17 A # Provisions, if any, for ancillary and post-trial care, and for N/A  
18 n 3 compensation to those who suffer harm from trial  
19 c 0 participation  
20

21 il  
22 l  
23 a  
24 r  
25 y  
26 a  
27 n  
28 d  
29 p  
30 o  
31 st  
32 tr  
33 i  
34 a  
35 l  
36 c  
37 a  
38 r  
39 e  
40  
41  
42  
43  
44  
45  
46  
47  
48  
49  
50  
51  
52  
53  
54  
55  
56  
57  
58  
59  
60

N/A

D # Plans for investigators and sponsor to communicate trial  
is 3 results to participants, healthcare professionals, the public,  
s 1 and other relevant groups (eg, via publication, reporting in  
e a results databases, or other data sharing arrangements),  
m including any publication restrictions  
i  
n  
a  
ti  
o  
n  
p  
o  
li  
c  
y  
:  
tr  
i  
a  
l  
r  
e  
s  
u  
lt  
s

1 D # Authorship eligibility guidelines and any intended use of N/A  
2  
3 is 3 professional writers  
4 s 1  
5 e b  
6 m  
7 i  
8 n  
9 a  
10 ti  
11 o  
12 n  
13 p  
14 o  
15 li  
16 c  
17 y  
18 :  
19 a  
20 u  
21 t  
22 h  
23 o  
24 r  
25 s  
26 h  
27 i  
28 p  
29  
30  
31  
32  
33  
34  
35  
36  
37  
38  
39  
40  
41  
42  
43  
44  
45  
46  
47  
48  
49  
50  
51  
52  
53  
54  
55  
56  
57  
58  
59  
60



1 D # Plans, if any, for granting public access to the full protocol, N/A  
2 is 3 participant-level dataset, and statistical code  
3 s 1  
4 e c  
5 m  
6 i  
7 n  
8 a  
9 ti  
10 o  
11 n  
12 p  
13 o  
14 li  
15 c  
16 y  
17 :  
18 r  
19 e  
20 p  
21 r  
22 o  
23 d  
24 u  
25 c  
26 i  
27 b  
28 l  
29 e  
30 r  
31 e  
32 s  
33 e  
34 a  
35 r  
36 c  
37 h

|    |    |   |                                                               |     |
|----|----|---|---------------------------------------------------------------|-----|
| 1  | I  | # | Model consent form and other related documentation given      | N/A |
| 2  |    |   |                                                               |     |
| 3  | n  | 3 | to participants and authorised surrogates                     |     |
| 4  | f  | 2 |                                                               |     |
| 5  |    |   |                                                               |     |
| 6  | o  |   |                                                               |     |
| 7  | r  |   |                                                               |     |
| 8  |    |   |                                                               |     |
| 9  | m  |   |                                                               |     |
| 10 |    |   |                                                               |     |
| 11 | e  |   |                                                               |     |
| 12 | d  |   |                                                               |     |
| 13 |    |   |                                                               |     |
| 14 | c  |   |                                                               |     |
| 15 | o  |   |                                                               |     |
| 16 | n  |   |                                                               |     |
| 17 |    |   |                                                               |     |
| 18 | s  |   |                                                               |     |
| 19 |    |   |                                                               |     |
| 20 | e  |   |                                                               |     |
| 21 | n  |   |                                                               |     |
| 22 | t  |   |                                                               |     |
| 23 |    |   |                                                               |     |
| 24 | m  |   |                                                               |     |
| 25 |    |   |                                                               |     |
| 26 | a  |   |                                                               |     |
| 27 | t  |   |                                                               |     |
| 28 |    |   |                                                               |     |
| 29 | e  |   |                                                               |     |
| 30 | ri |   |                                                               |     |
| 31 |    |   |                                                               |     |
| 32 | a  |   |                                                               |     |
| 33 | ls |   |                                                               |     |
| 34 |    |   |                                                               |     |
| 35 |    |   |                                                               |     |
| 36 | B  | # | Plans for collection, laboratory evaluation, and storage of   | N/A |
| 37 | i  | 3 | biological specimens for genetic or molecular analysis in     |     |
| 38 |    |   |                                                               |     |
| 39 | o  | 3 | the current trial and for future use in ancillary studies, if |     |
| 40 |    |   |                                                               |     |
| 41 | l  |   | applicable                                                    |     |
| 42 |    |   |                                                               |     |
| 43 | o  |   |                                                               |     |
| 44 |    |   |                                                               |     |
| 45 | g  |   |                                                               |     |
| 46 |    |   |                                                               |     |
| 47 | i  |   |                                                               |     |
| 48 |    |   |                                                               |     |
| 49 | c  |   |                                                               |     |
| 50 |    |   |                                                               |     |
| 51 | a  |   |                                                               |     |
| 52 |    |   |                                                               |     |
| 53 | l  |   |                                                               |     |
| 54 |    |   |                                                               |     |
| 55 | s  |   |                                                               |     |
| 56 |    |   |                                                               |     |
| 57 | p  |   |                                                               |     |
| 58 |    |   |                                                               |     |
| 59 | e  |   |                                                               |     |
| 60 |    |   |                                                               |     |
|    | c  |   |                                                               |     |
|    |    |   |                                                               |     |
|    | i  |   |                                                               |     |

m  
e  
n  
s

## Author notes

1. 15, 16, 17, 18

The SPIRIT checklist is distributed under the terms of the Creative Commons Attribution License CC-BY-ND 3.0. This checklist was completed on 12. December 2018 using <http://www.goodreports.org/>, a tool made by the [EQUATOR Network](#) in collaboration with [Penelope.ai](#)

# BMJ Open

## **The Surveillance After Extremity Tumour surgery (SAFETY) Trial: Protocol for a pilot study to determine the feasibility of a multi-centre randomized controlled trial**

|                                 |                                                                                                                 |
|---------------------------------|-----------------------------------------------------------------------------------------------------------------|
| Journal:                        | <i>BMJ Open</i>                                                                                                 |
| Manuscript ID                   | bmjopen-2019-029054.R2                                                                                          |
| Article Type:                   | Protocol                                                                                                        |
| Date Submitted by the Author:   | 09-Aug-2019                                                                                                     |
| Complete List of Authors:       | Ghert, Michelle; McMaster University, Department of Surgery; Hamilton Health Sciences, Juravinski Cancer Centre |
| <b>Primary Subject Heading</b>: | Oncology                                                                                                        |
| Secondary Subject Heading:      | Surgery                                                                                                         |
| Keywords:                       | surveillance, soft tissue sarcoma, study protocol, randomised controlled trial, pilot study                     |
|                                 |                                                                                                                 |

SCHOLARONE™  
Manuscripts

1  
2  
3 *Original article*  
4

5 **The Surveillance AftEr Extremity Tumour surgerY (SAFETY) Trial: Protocol for a pilot**  
6  
7 **study to determine the feasibility of a multi-centre randomized controlled trial**  
8  
9

10 The SAFETY Investigators  
11  
12  
13

14 **Protocol version 1; December 3, 2018**  
15  
16  
17  
18  
19  
20  
21  
22  
23  
24  
25

26 **Correspondence and reprints**  
27

28 Michelle Ghert, MD, FRCSC  
29

30 Professor of Surgery  
31

32 Division of Orthopaedic Surgery  
33

34 Department of Surgery  
35

36 McMaster University  
37

38 711 Concession Street  
39

40 Hamilton, ON  
41

42 Canada  
43

44 Tel: 905-387-9495 ext 64089  
45

46 Fax: 905-381-7071  
47

48 Email: [mghert@hhsc.ca](mailto:mghert@hhsc.ca)  
49  
50

51 **Contributor list with affiliations**  
52  
53  
54  
55  
56  
57  
58  
59  
60

1  
2  
3 Michelle Ghert, MD, FRCSC (Steering Committee Chair)  
4 Department of Surgery, McMaster University (Hamilton, Ontario, Canada)  
5  
6

7 Mohit Bhandari, MD, PhD, FRCSC  
8 Department of Surgery & Department of Health Research Methods, Evidence and Impact,  
9 McMaster University (Hamilton, Ontario, Canada)  
10

11 Anthony Bozzo, MD  
12 Department of Surgery, McMaster University (Hamilton, Ontario, Canada)  
13  
14

15 P.D. Sander Dijkstra, MD, PhD  
16 Department of Orthopaedics, Leiden University Medical Center (Leiden, the Netherlands)  
17  
18

19 Anthony Griffin, MSc  
20 Musculoskeletal Oncology Unit, Mount Sinai Hospital (Toronto, Ontario, Canada)  
21  
22

23 Robert Grimer, MB BS, DSc, FRCS, FRCS Ed(Orth)  
24 Department of Surgery, University of Birmingham (Birmingham, United Kingdom)  
25  
26

27 James Hayden, MD, PhD, FACS  
28 Department of Orthopaedics & Rehabilitation, Oregon Health & Science University (Portland,  
29 Oregon, USA)  
30

31 Arlene Manherz  
32 (Community)  
33  
34

35 Karim Masrouha, MD  
36 Department of Surgery, McMaster University (Hamilton, Ontario, Canada)  
37  
38

39 Paula McKay, BSc  
40 Department of Surgery, McMaster University (Hamilton, Ontario, Canada)  
41  
42

43 Benjamin Miller, MD, MS, FACS  
44 Department of Orthopaedics & Rehabilitation, University of Iowa (Iowa City, Iowa, USA)  
45  
46

47 Naveen Parasu, MD, MRCP (UK), MRCR (UK), FRCPC  
48 Department of Radiology, McMaster University (Hamilton, Ontario, Canada)  
49  
50

51 Ajay Puri, MS (Ortho)  
52 Department of Surgical Oncology, Tata Memorial Centre (Mumbai, India)  
53  
54

55 R. Lor Randall, MD, FACS  
56  
57  
58  
59  
60

1  
2  
3 Department of Orthopaedic Surgery, University of California, Davis (Sacramento, California,  
4 USA)  
5

6  
7 Patricia Schneider, BSc  
8 Department of Surgery, McMaster University (Hamilton, Ontario, Canada)  
9

10  
11 Sheila Sprague, PhD  
12 Department of Surgery, McMaster University (Hamilton, Ontario, Canada)  
13

14  
15 Nina Szpakowski, MSc, DVM  
16 (Community)  
17

18  
19 Lehana Thabane, PhD  
20 Department of Health Research Methods, Evidence and Impact, McMaster University  
21 (Hamilton, Ontario, Canada)  
22

23  
24 Robert Turcotte, MD, FRCSC  
25 Department of Surgery, McGill University (Montreal, Quebec, Canada)  
26

27  
28 Roberto Vélez, MD, PhD  
29 Department of Orthopaedic Surgery, Hospital Vall d'Hebron (Barcelona, Catalunya, Spain)  
30

31  
32 David Wilson, MD, MSc  
33 Department of Surgery, McMaster University (Hamilton, Ontario, Canada)  
34

35  
36 Kevin Zbuk, MD, FRCPC  
37 Department of Oncology, McMaster University (Hamilton, Ontario, Canada)  
38

39  
40 Gordon Guyatt, MD, FRCPC  
41 Department of Medicine & Department of Health Research Methods, Evidence and Impact,  
42 McMaster University (Hamilton, Ontario, Canada)  
43  
44  
45  
46  
47  
48  
49  
50  
51  
52  
53  
54  
55  
56  
57  
58  
59  
60

## Abstract

**Introduction** Following the treatment of patients with soft tissue sarcomas (STS) that are not metastatic at presentation, the high risk for local and systemic disease recurrence necessitates post-treatment surveillance. Systemic recurrence is most often detected in the lungs. The most appropriate surveillance frequency and modality remain unknown and, as such, clinical practice is highly varied. We plan to assess the feasibility of conducting a multi-centre randomised controlled trial (RCT) that will evaluate the effect on overall five-year survival of two different surveillance frequencies and imaging modalities in patients with STS who undergo surgical excision with curative intent.

**Methods and analysis** The SAFETY trial will be a multi-centre 2x2 factorial randomized controlled trial. Patients with non-metastatic primary Grade II or III STS treated with excision will be allocated to one of four treatment arms: (1) chest radiograph (CXR) every three months for two years; (2) CXR every six months for two years; (3) chest computed tomography (CT) every three months for two years; or (4) chest CT every six months for two years. The primary outcome of the pilot study is the feasibility of a definitive RCT based on a combination of feasibility endpoints. Secondary outcomes for the pilot study include the primary outcome of the definitive trial (overall survival), patient-reported outcomes on anxiety, satisfaction and quality of life, local recurrence-free survival, metastasis-free survival, treatment-related complications, and net healthcare costs related to surveillance.

**Ethics and dissemination** This trial received *Pro Tempore* ethics approval from the McMaster / Hamilton Health Sciences Research Ethics Board. Final ethics approval will be obtained prior to commencing patient recruitment. Once feasibility has been established and the definitive protocol is finalized, the study will transition to the definitive study.



## Article summary

### Strengths and limitations of this study

- The SAFETY trial will be an international multi-centre 2x2 factorial randomized controlled trial
- The trial will answer a high priority question for sarcoma surgeons
- The SAFETY trial will build on the international collaboration and experience of the PARITY trial
- The feasibility pilot study is essential before undertaking this large multi-centre trial
- The success of the pilot study is dependent on the ability of clinical sites to recruit patients, comply with the protocol, and complete high quality follow-up data

**Keywords:** surveillance; soft tissue sarcoma; study protocol; randomized controlled trial; pilot study

## Background

### *Magnitude of the problem*

Sarcomas are malignancies of connective tissue that most commonly occur in the extremities. Sarcomas can arise within bone (bone sarcoma) or soft-tissue (soft-tissue sarcoma [STS]). Chemotherapy is not curative for the vast majority of patients with STS(1); therefore, surgery is the standard treatment for STS, with radiation considered important for local disease control.

Following treatment for a STS that is not metastatic at presentation, the risk for local and systemic disease recurrence necessitates careful post-operative surveillance. Between 40% and 50% of all sarcoma patients will develop a local or distant recurrence; however, the risk of recurrence is greatest in the first few years, with 68% occurring by two years and 90% by five years(2-4). Metastasis to the lung is the most frequent single location of disease recurrence in sarcoma patients, occurring in the majority of patients with metastases(4-7). Therefore, routine follow-up after completing sarcoma treatment is standard practice in the first five years after surgery. These visits typically include a clinical history, physical examination, and imaging of the lungs (chest radiograph [CXR], or computed tomography [CT] scan of the lungs).

Surveillance strategies for long-term follow-up of sarcoma patients have not been well researched and current guidelines are based on expert opinion, not on high quality evidence(8, 9). As such, current clinical practice is highly varied, with survey data of musculoskeletal oncologists showing that the number of clinic visits ranges from two to 12, the number of CXRs obtained ranges from zero to 13, and the number of CT scans ranges from one to eight in the first year of surveillance(10-12). The current National Comprehensive Cancer Network guidelines suggest that stage II or III tumors should be followed with chest imaging (CT or CXR) every two to six months

1  
2  
3 for the first two to three years and then annually thereafter, while stage I tumors could be followed  
4  
5 less frequently during the first two to three years (13).  
6  
7  
8  
9

### 10 *Best evidence for surveillance strategies*

11  
12 Post-treatment soft-tissue sarcoma surveillance is an integral element of patient care. Although  
13  
14 earlier detection of metastatic disease may improve long-term survival, no study has yet provided  
15  
16 definitive evidence to support this assumption. In order to assess the available evidence, we  
17  
18 completed a systematic review of the available randomized controlled trial (RCT) evidence for  
19  
20 surveillance in sarcoma management(14). A single study (published separately with early and  
21  
22 longer-term follow-up) was identified(15, 16). The authors of this single-centre study found that  
23  
24 three-year overall and disease-free survival was not worse in sarcoma patients who had less  
25  
26 intensive surveillance (CXR) than those with more intensive surveillance (CT scans)(15). Due to  
27  
28 the sample size, this trial could not conclusively demonstrate non-inferiority in overall or disease-  
29  
30 free survival for a six-monthly interval of follow-up visits against three-monthly interval (both  
31  
32 were 64% and 69%, respectively)(15).  
33  
34  
35  
36  
37

38 A follow-up study on the same patient cohort with five-year survival outcomes confirmed  
39  
40 that more frequent follow-up did not improve survival and that, although CT scans detected  
41  
42 pulmonary metastasis earlier, they did not lead to better survival compared with CXRs(16).  
43  
44 However, this was a single-centre study with relatively small numbers and, therefore, confidence  
45  
46 in the results and generalizability of the data to other centres is limited. In addition, a relatively  
47  
48 small proportion of screened patients (42%) that were eligible for the trial were included due to  
49  
50 the exclusion of patients unlikely to follow-up, thus possibly introducing selection bias(15).  
51  
52  
53 Furthermore, low-grade sarcomas were eligible and included in this study, even though they have  
54  
55  
56  
57  
58  
59  
60

1  
2  
3 little metastatic potential and tumour-related mortality; their inclusion may have diminished the  
4 magnitude of the effects of the interventions(15). Finally, the majority of the included patients  
5 were bone sarcoma patients, thereby limiting the interpretation to STS patients(15).  
6  
7  
8  
9

### 10 11 12 *Risks and benefits of intensive surveillance* 13

14 Regular, intensive surveillance is more likely to identify recurrent disease earlier than would less  
15 intensive surveillance. This type of surveillance may provide reassurance to patients and clinicians;  
16 however, the adverse effects of intensive surveillance practices are also noteworthy. The costs that  
17 healthcare systems incur as a result of sarcoma surveillance are substantial and could be in excess  
18 of USD \$20,000 for high-grade sarcomas(17). Furthermore, intensive surveillance can threaten the  
19 financial security of patients, due in part to the direct (including travel, accommodation, personal  
20 care, and homemaking) and indirect costs (including lost wages for patients and their caregivers)  
21 incurred as a result of follow-up appointments(18). As a result, patients' health and quality of life  
22 can be dramatically impacted(18-20).  
23  
24  
25  
26  
27  
28  
29  
30  
31  
32  
33  
34

35 Secondary investigations and earlier knowledge of disease recurrence can also induce  
36 anxiety and impact the psychosocial wellbeing for those whose mortality risk cannot be  
37 significantly reduced by further medical interventions(21). Overcrowded clinics and long wait  
38 times may constitute other important factors that affect patients' psychosocial wellbeing(22).  
39 Finally, the use of CT has raised concerns over unnecessary radiation exposure compared to  
40 radiographs, although lower dose CT scans may mitigate some of these concerns(23).  
41  
42  
43  
44  
45  
46  
47  
48  
49  
50

### 51 *Surveillance research as a priority in orthopedic oncology* 52 53 54 55 56 57 58 59 60

1  
2  
3 We recently published a modified Delphi study in which we aimed to identify a clinically relevant  
4 consensus-based research agenda in the sarcoma field(24). From this Delphi process that included  
5  
6 80 orthopaedic oncologists and patient representation (with participation from 18 countries), we  
7  
8 identified critical research priorities in the field of orthopaedic oncology and determined the top  
9  
10 four feasible and important research questions that will directly inform patient care and enhance  
11  
12 clinical practice. This study identified the evaluation of post-operative surveillance strategies as  
13  
14 the highest-ranking research priority in the sarcoma field(24).  
15  
16  
17  
18  
19  
20  
21

### 22 **Patient and public involvement**

23  
24 To ensure that we maintain a patient-centered approach to the design and development of this  
25  
26 study, we required the opportunity for open dialogue between the multidisciplinary and  
27  
28 international SAFETY study team, along with patient / caregiver representatives and other key  
29  
30 stakeholders. To facilitate their interaction and collaboration, we held an in-person Protocol  
31  
32 Development Meeting in Toronto, ON, Canada in May 2018. At this meeting, we made critical  
33  
34 decisions with respect to the study protocol, including: A) study design; B) primary and secondary  
35  
36 outcomes; C) patient eligibility; D) follow-up timeframe; E) methods to protect against bias; F)  
37  
38 randomization stratification; and G) further patient engagement. We also had the opportunity to  
39  
40 discuss several issues that may compromise the study's success and strategize ways to manage  
41  
42 these challenges, such as: I) acceptable surveillance schedules that account for differences in  
43  
44 international standards of clinical practice; II) possible ethical concerns; III) patient compliance;  
45  
46 IV) local implementation and procedural variation; V) competing studies; and VI) funding  
47  
48 opportunities.  
49  
50  
51  
52  
53  
54  
55  
56  
57  
58  
59  
60

1  
2  
3 We are also conducting a patient survey to assess international patient willingness to  
4 participate in a study that randomizes patients to a post-operative surveillance regimen in the  
5 management of a primary extremity sarcoma. Since there is no available validated tool to assess  
6 patient opinions and preferences, we developed a unique patient questionnaire for the purposes  
7 of this study. All new patients who present to a participating sarcoma clinic are screened for study  
8 participation. The preliminary survey questionnaire responses suggest that most sarcoma  
9 patients believe that they have a good understanding of clinical research. Furthermore, over half  
10 of respondents feel comfortable with being randomized to receive a treatment. Ultimately,  
11 almost 80% of respondents have indicated that they would agree to participate in the SAFETY  
12 trial if eligible.  
13  
14  
15  
16  
17  
18  
19  
20  
21  
22  
23  
24  
25  
26  
27  
28  
29

### 30 **Study design**

31  
32 We plan to assess the feasibility of conducting the pragmatic, international, multi-centre, 2x2  
33 factorial Surveillance AftEr Extremity Tumour surgery (SAFETY) RCT that answers the  
34 following questions: In extremity STS patients who undergo surgical resection with curative intent,  
35 (1) what is the impact of surveillance frequency (every three vs. every six months) on overall  
36 survival at five years, and (2) what is the impact of surveillance imaging modality (CXR vs. CT  
37 scan) on overall survival at five years? To assess feasibility, we will conduct a pilot study. Study  
38 participants will be randomized to one of four possible treatment arms (see Study Interventions  
39 below). Randomization will occur at the end of active treatment (surgery  $\pm$  systemic treatment  $\pm$   
40 local radiation). Following the two-year intervention phase, study participants will continue to be  
41 assessed at regular intervals for an additional three years. As such, all pilot study patients will be  
42 transitioned into the definitive study and be included in it. Details of the flow of each study arm  
43  
44  
45  
46  
47  
48  
49  
50  
51  
52  
53  
54  
55  
56  
57  
58  
59  
60

1  
2  
3 are outlined in Figure 1. We anticipate the duration of the pilot study to be three years in order to  
4 collect intervention phase data on all participants. The primary outcome of the pilot study is the  
5 feasibility of a definitive RCT based on a combination of feasibility endpoints.  
6  
7  
8  
9

10 The 2x2 factorial study design is ideal and the most efficient method to study two treatment  
11 interventions in a single RCT, particularly when there is no interaction between the two  
12 interventions. This is unlike a scenario in which the two interventions are medications that may  
13 have a synergistic or negative effect when combined. A Bayesian design would be useful to avoid  
14 the question of whether or not an interaction exists, however for the purposes of the present trial it  
15 is clear that no interaction exists between the frequency and intensity of surveillance. As Freidlin  
16 and Korn discuss in their commentary, the 2x2 factorial design is an efficient design to evaluate  
17 two interventions in a cancer clinical trial when there are no interactions between treatments(25).  
18  
19  
20  
21  
22  
23  
24  
25  
26  
27  
28

## 29 **Objectives**

### 30 *Pilot study primary research objectives*

31  
32 The primary objective of the pilot study will be to determine whether it is feasible to conduct a  
33 large multi-centre RCT that will evaluate the impact of surveillance strategies on patient survival  
34 following extremity STS surgery. To do so, we will assess our ability to:  
35  
36  
37  
38

- 39  
40  
41 A) Recruit patients across multiple participating clinical sites;  
42  
43 B) Ensure compliance with the study protocol, including the application of eligibility criteria,  
44 timing of intervention phase and post-intervention phase visits and imaging modality;  
45  
46  
47 C) Maintain completeness of follow-up data;  
48  
49 D) Maintain completeness of cost analysis data; and  
50  
51 E) Maintain data quality.  
52  
53  
54  
55  
56  
57  
58  
59  
60

### *Pilot study secondary research objectives*

The secondary objectives of the pilot study will include assessing the impact of either surveillance frequency (every three vs. every six months) or imaging modality (CXR vs. CT scan) on:

- A) Overall survival;
- B) Patient anxiety, satisfaction and quality of life;
- C) Local recurrence-free survival and metastasis-free survival;
- D) Treatment-related complications; and
- E) Net direct healthcare costs and net costs of treatment and treatment-related complications once metastases are detected.

## **Hypothesis**

### *Pilot study*

We hypothesize that the SAFETY trial will be feasible due to: A) its pragmatic design; B) our established international collaborative research network; C) our qualified, multi-disciplinary study team; D) our existing trial infrastructure; and E) the priority of the study question.

### *Definitive study*

There are two hypotheses:

- 1- More frequent post-operative surveillance (compared to less frequent post-operative surveillance) in the first two years following the surgical excision of a STS will improve survival over five years;
- 2 - The use of post-operative CT scans (compared to CXR) in the first two years following the surgical excision of a STS will improve survival over five years.



## Study setting

This study will be coordinated by the Methods Centre within the Centre for Evidence-Based Orthopaedics (CEO) at McMaster University (Hamilton, ON, Canada). For the pilot study, we expect that patients will be enrolled from ten clinical sites across four continents. Clinical sites will be carefully screened prior to participation in the study. The clinical site inclusion criteria are: I) adequate research personnel and infrastructure to manage the study; II) sufficiently high extremity STS volume to complete enrollment within the study timeline (defined as greater than or equal to ( $\geq$ ) 20 patients per year); III) commitment from all or most orthopaedic oncologists to participate in the trial; and IV) access to the two imaging modalities. The exclusion criteria are: I) a lack of interest in the trial; II) anticipated challenges with protocol compliance; III) conflicting studies, in the judgment of the Principal Investigator, that would inhibit patient participation; and IV) financial or contract constraints.

## Patient eligibility criteria

### *Inclusion criteria*

Patients who meet all of the following criteria will be included:

- 1) Age of 18 years or older;
- 2) Diagnosed with a primary extremity grade II or III STS;
- 3) Undergone surgical resection of the tumour with curative intent and grossly negative margins (R0 or R1 resection margins);
- 4) Completed neoadjuvant or adjuvant radiation and / or chemotherapy, if applicable;

- 5) The tumour size is greater than or equal to ( $\geq$ ) five centimeters according to the pathology report or pre-treatment MRI if neoadjuvant radiation and / or chemotherapy are given; and
- 6) Provision of informed consent.

### *Exclusion criteria*

Patients who meet any of the following criteria will be excluded:

- 1) Metastatic disease at initial presentation based on thoracic imaging (a second CT scan may be required to confirm that indeterminate nodules are false positives before the patient can be enrolled provided that the second CT scan shows no evidence of metastatic disease);
- 2) Undergone surgical excision of a local recurrence;
- 3) Diagnosis of one of the special sub-types: myxoid / round cell liposarcoma or extra-skeletal Ewing's sarcoma (These sarcomas have different metastatic patterns, which necessitate different surveillance protocols);
- 4) Previous diagnosis of a genetic syndrome with an elevated risk of malignancy, such as Li-Fraumeni Syndrome (such individuals appear to be at an elevated risk for radiation-induced cancers, so the use of CT scans should be limited);
- 5) Previous diagnosis with a co-morbid condition that has a life expectancy of less than one year;
- 6) The site-specific surveillance protocol for the patient's disease is not compatible with the study protocol (i.e., regular planned whole-body imaging with positron emission tomography [PET] scans);
- 7) Diagnosed with another malignancy within the past five years;
- 8) Likely problems, in the judgment of the investigator, with maintaining follow-up; and
- 9) Currently enrolled in a study that does not permit co-enrollment;

1  
2  
3 10) The patient has already been enrolled in the SAFETY trial.  
4  
5  
6  
7

### 8 **Recruitment and screening**

9

10 Each participating clinical site will have a locally responsible investigator who will oversee the  
11 local administration of the trial, screen STS patients for eligibility, and develop a site-specific  
12 patient enrollment plan. A Screening Form will be completed for all STS patients aged 18 years  
13 or older, irrespective of whether they are eligible to participate in the study or not. Patients will  
14 become eligible, will be screened and consented during the first clinic visit at which all treatment  
15 is complete, the surgical wound has healed, and the plan for post-treatment surveillance is  
16 discussed with the patient. The process of obtaining and documenting informed consent will be  
17 completed in accordance with local Good Clinical Practice recommendations. Consent procedures  
18 will comply with the appropriate ethics committee and the Health Insurance Portability and  
19 Accountability Act (where applicable).  
20  
21  
22  
23  
24  
25  
26  
27  
28  
29  
30  
31  
32  
33  
34

### 35 **Randomisation and allocation of patients to study groups**

36

37 A centralised and automated internet-based randomisation system using random variable block  
38 sizes will assign participants to the study groups. Study personnel at each participating site will  
39 complete this task. Randomisation will occur only after eligibility is confirmed and consent to  
40 participate has been obtained. Participants will be stratified based on clinical site and peri-  
41 operative chemotherapy.  
42  
43  
44  
45  
46  
47  
48  
49  
50

### 51 **Study interventions**

52

53 Participants will be randomised to one of four treatment groups:  
54  
55  
56  
57  
58  
59  
60

- 1
- 2
- 3 1) CXR every three months for two years;
- 4
- 5 2) CXR every six months for two years;
- 6
- 7 3) Chest CT every three months for two years; or
- 8
- 9 4) Chest CT every six months for two years.
- 10
- 11

12 Following completion of the intervention phase, participants will continue to be followed  
13 in the study for an additional three years. During this three-year post-intervention phase,  
14 participants will be followed at least every six months as per National Comprehensive Cancer  
15 Network (NCCN) guidelines(13). If possible, thoracic imaging will continue at each scheduled  
16 post-intervention phase visit according to the participants' original allocations.  
17  
18  
19  
20  
21  
22  
23  
24  
25

## 26 **Relapse**

27  
28 Local imaging and clinical assessment of the primary tumour site will be carried out as per the  
29 standard protocol at each participating clinical site. Further diagnostic tests will be performed in  
30 the presence of clinical symptoms or radiologic findings suggestive of disease relapse. Recurrence  
31 will be radiologically or histologically confirmed and classified as local or systemic (metastasis)  
32 recurrence. The first modality suggesting disease relapse in participants with confirmed local or  
33 systemic recurrence will be recorded as responsible for its detection.  
34  
35  
36  
37  
38  
39  
40  
41  
42  
43

## 44 **Outcome measures**

### 45 *Pilot study primary outcome*

46  
47 To evaluate feasibility, we will assess the number of patients screened and recruited at each  
48 participating clinical site, participant retention, and maintenance of data quality. In addition, we  
49 will evaluate the utilization of an internet-based centralized randomisation system focusing on the  
50  
51  
52  
53  
54  
55  
56  
57  
58  
59  
60

1  
2  
3 accuracy of data entry, appropriate stratification of participants and the minimization of  
4  
5 randomisation errors. Finally, we will evaluate investigator and participant compliance with the  
6  
7 study protocol, including the application of eligibility criteria, compliance with the surveillance  
8  
9 imaging and frequency regimens, frequency of crossover and timing of post-intervention phase  
10  
11 visits. As discussed by Moore *et al.*, the pilot study will investigate the process of the proposed  
12  
13 definitive trial rather than its outcomes (26). The *a priori* criteria for the success of the pilot study  
14  
15 are listed below:  
16  
17

18  
19 A) *Recruitment Measure*: We will consider our recruitment strategy feasible if we are able to enroll  
20  
21 the pilot sample of 195 patients (approximately 20 patients from each clinical site participating in  
22  
23 the pilot study) within two years. See sample size determination below. As such, we will aim to  
24  
25 recruit 100 patients during the first year. If we are unable to achieve at least 90% of this goal (90  
26  
27 patients) then we will plan to increase the number of participating sites as a study rescue measure.  
28  
29

30  
31 B) *Protocol Adherence Measure*: During the pilot study of the PARITY trial, we were able to  
32  
33 maintain an overall protocol adherence rate in excess of 90%(27). Recent reports prepared for the  
34  
35 PARITY Data and Safety Monitoring Board (DSMB) indicate a similar protocol adherence rate.  
36  
37 However, given the greater complexity and longer duration of the SAFETY trial interventions, we  
38  
39 will consider our protocol adherence strategies feasible if there is adherence of 85% or greater to  
40  
41 the visit windows and imaging modality prescribed by the protocol.  
42  
43

44  
45 C) *Participant Retention Measure*: While 20% loss-to-follow-up has traditionally been considered  
46  
47 acceptable in clinical research, evidence from other orthopaedic trials suggests that bias begins to  
48  
49 affect study results at even lower rates of loss-to-follow-up(28). Therefore, we will consider our  
50  
51 participant retention strategies feasible if no more than 15% of participants are lost-to-follow-up.  
52  
53  
54  
55  
56  
57  
58  
59  
60

1  
2  
3 D) *Maintenance of Data Quality Measure*: We obtained a data completeness rate of approximately  
4  
5 90% in the PARITY trial pilot study (27). Therefore, we will consider our data quality strategies  
6  
7 feasible if we are able to maintain 95% or greater completeness of participant follow-up data for  
8  
9 the definitive primary outcome. We will also consider our data quality strategies feasible if we are  
10  
11 able to maintain 85% or greater completeness of participant follow-up data for the secondary  
12  
13 outcomes.  
14  
15

16  
17  
18  
19 *Pilot study secondary outcomes*  
20

21 Death from any cause will be recorded during the pilot study. Data on secondary outcomes for the  
22  
23 definitive trial, which are listed below, will also be collected. These include:  
24  
25

26 A) *Patient-reported outcome measures*: The validated Patient-Reported Outcomes Measurement  
27  
28 Information System (PROMIS)<sup>®</sup> Cancer-Anxiety questionnaire, PROMIS<sup>®</sup> Satisfaction with  
29  
30 Social Roles and Activities questionnaire, and the EuroQol-5 Dimension (EQ-5D) will be used to  
31  
32 assess patient anxiety, satisfaction and quality of life, respectively. These questionnaires will be  
33  
34 administered at the baseline visit, as well as the 6-month, 12-month, 18-month and 24-month  
35  
36 intervention phase, as well as 36-month, 48-month and 60-month post-intervention phase visits.  
37  
38

39 B) *Local recurrence-free survival (LRFS) outcome measure*: LRFS will be defined as the length  
40  
41 of time from randomization that the participant survives with no detection of recurrent disease at  
42  
43 the initial tumor site or operative field.  
44  
45

46 C) *Metastasis-free survival (MFS) outcome measure*: MFS will be defined as the length of time  
47  
48 from randomization that the participant survives with no detection of systemic disease recurrence  
49  
50 at any anatomic location.  
51  
52  
53  
54  
55  
56  
57  
58  
59  
60

1  
2  
3 D) *Treatment-related complications outcome measures*: Treatment-related complications will  
4 include both chemotherapy-related complications, such as febrile neutropenia, fungal infections or  
5  
6 include both chemotherapy-related complications, such as febrile neutropenia, fungal infections or  
7  
8 sepsis, and thoracotomy-related complications, such as pneumothorax, or surgical site infections.  
9

10 E) *Net healthcare costs outcome measures*: We will perform an incremental cost analysis of net  
11  
12 costs of surveillance and costs incurred from metastasis treatment and metastasis treatment related  
13  
14 complications. Unit costs for all resources used by trial participants will be obtained from regional  
15  
16 statistics and from centers participating in the trial. These unit costs will be combined with the  
17  
18 resource volumes to obtain a net cost per participant over their time in the trial.  
19  
20  
21  
22  
23

## 24 **Protecting against sources of bias**

### 25 *Adjudication of outcomes*

26  
27 An independent Central Adjudication Committee (CAC) will review all situations where eligibility  
28  
29 is in doubt, as well as all reported instances of disease relapse, treatment-related complications,  
30  
31 and death to determine whether a study event has occurred. The SAFETY CAC will be comprised  
32  
33 of two orthopaedic oncologists, one medical oncologist, and one radiologist. All participating  
34  
35 clinical sites will submit digital imaging and relevant hospital records to the Methods Centre via a  
36  
37 web-based platform for events that require adjudication.  
38  
39  
40  
41  
42  
43

### 44 *Blinding*

45  
46 The local clinical team, site study personnel and participants cannot be blinded to the treatment  
47  
48 allocation. The CAC will be blinded to surveillance frequency. The data analysts will, however,  
49  
50 remain blinded during the trial's analysis.  
51  
52  
53  
54  
55  
56  
57  
58  
59  
60

### *Maximization of follow-up*

We anticipate only minimal losses to follow-up in our musculoskeletal oncology population.

Nonetheless, the following procedures will be implemented to minimize losses:

- Individuals likely to present problems with compliance to the study protocol or maintaining follow-up will be excluded;
- At the time of randomization, participants will be asked to provide their contact information, as well as the contact information of their family physician and three alternate contacts;
- Participants who refuse to return for a study assessment will be asked if they are willing to provide follow-up data (to determine survival and to complete study questionnaires) via telephone;
- If a participant cannot be reached, their status regarding the primary study outcome will be assessed by reviewing their medical records;
- Study personnel will remind participants of upcoming clinic visits;
- To assuage possible concerns related to less frequent follow-up, participants will be encouraged to schedule an ad hoc visit anytime they are concerned, even if it breaks the surveillance protocol to which they were assigned;
- Participants will be provided with access to educational content, such as a video that demonstrates how to self-examine for a local recurrence of their STS; and
- Parking and travel vouchers will be provided to participants, where possible, to alleviate the costs associated with the study.

### *Minimization of crossovers of surveillance interventions*



1  
2  
3 Crossovers are unlikely for either surveillance intervention as investigators will be requesting the  
4 imaging modality during surveillance visits. Any deviation with regards to frequency or imaging  
5 modality will be documented. In the event of disease recurrence or progression, the following  
6  
7  
8  
9  
10 standardized management protocols will be adopted:

- 11  
12 ▪ Local Recurrence: the participant will have a lung CT scan to confirm no progression of their  
13 systemic disease before continuing with the study protocol.
- 14  
15 ▪ Metastases: the participant will no longer be followed as per the study protocol, but per the  
16 appropriate follow-up for the interventions required for the treatment of metastases; however,  
17 the participant will continue to be followed in the trial.  
18  
19  
20  
21  
22

23  
24 For both events, the specific imaging modality used to detect either the local recurrence or the  
25 metastases will be documented.  
26

27  
28 Patients that have incidental or off-protocol imaging will not crossover, however this will  
29 be documented as a protocol deviation. In the case of a CXR that warrants further investigation  
30 with a CT scan, this will be documented. If the patient is found to have disease recurrence, we will  
31 document how the disease recurrence was (A) first identified; and (B) confirmed. If after a CT  
32 scan the patient is found to not have disease recurrence, the patient will resume surveillance as per  
33 the arm to which they were randomised.  
34  
35  
36  
37  
38  
39  
40  
41  
42  
43

## 44 **Sample size determination**

### 45 *Pilot study sample size*

46  
47 The confidence interval approach was used to calculate the required sample size for the pilot  
48 study(29). We determined *a priori* that the definitive trial would only be feasible if our protocol  
49  
50  
51  
52  
53  
54  
55  
56  
57  
58  
59  
60

1  
2  
3 adherence rate was at least 85%. Using a 95% confidence level and a 5% margin of error, we  
4  
5 calculated a required sample size of 195 patients.  
6  
7  
8  
9

### 10 *Definitive study sample size*

11  
12 Our best estimate of the control group overall five-year survival for both the surveillance frequency  
13  
14 and imaging modality is 55%(16). Given that intensive surveillance will detect metastatic disease  
15  
16 at an earlier stage, we will use a superiority design to compare survival between more versus less  
17  
18 intensive surveillance. A 10% absolute increase in overall five-year survival associated with both  
19  
20 more frequent surveillance and the use of CT scans represents a clinically important difference, as  
21  
22 outlined by the American Society of Clinical Oncology's statement on clinically meaningful  
23  
24 outcomes in cancer trials(30). Therefore, the definitive trial will be powered to detect an absolute  
25  
26 difference of 10% in overall five-year survival.  
27  
28  
29

30  
31 With a desired power of 0.80, we calculated a sample size of 396 participants per study  
32  
33 arm. We will account for a 5% loss to follow-up and, therefore, the final sample size will be 830  
34  
35 participants. **Table 1** shows various sample sizes for pairwise comparisons of alternative  
36  
37 surveillance frequencies / imaging modalities given varying control event rates and absolute  
38  
39 increases in survival. Statistical Package for the Social Sciences (SPSS) (IBM Corporation)  
40  
41 software was used for sample size calculation.  
42  
43  
44

45 The definitive sample size calculation may be adjusted as we prepare for the transition from  
46  
47 the pilot to the definitive study as a result of data collected during the pilot study. One factor we  
48  
49 may consider will be the percent lost to follow-up by the end of the pilot study. Other factors such  
50  
51 as the estimated control group overall five-year survival, the clinically meaningful outcome, and  
52  
53 power cannot be amended. The rationale for transition of subject data from the pilot study to the  
54  
55  
56  
57  
58  
59  
60

definitive study has previously been discussed (31). It is acceptable to pool the data if the study methods are not adjusted following the pilot study, and the research tools are standardized.

**Table 1.** Sample Size Per Group for 80% power,  $\alpha=0.05$ . Event rate = death

|                                                 |     | Event Rate in More Intensive Surveillance Group |      |      |      |
|-------------------------------------------------|-----|-------------------------------------------------|------|------|------|
|                                                 |     | 25%                                             | 30%  | 35%  | 40%  |
| Event Rate in Less Intensive Surveillance Group | 35% | 696                                             | 2832 | -    | -    |
|                                                 | 40% | 332                                             | 752  | 3020 | -    |
|                                                 | 45% | 196                                             | 352  | 792  | 3148 |
|                                                 | 50% | 132                                             | 204  | 368  | 816  |
|                                                 | 55% | 96                                              | 136  | 212  | 372  |

### Analysis of feasibility outcomes

A full description of the measures, variables, and methods of analysis are shown in **Table 2**. We will record the total number of participants enrolled on a monthly basis. Each participating site will keep a Screening Log of included and excluded patients. We will also keep a record of participants who miss visits, and those who are withdrawn or lost to follow-up. These will be reported using descriptive statistics – reported as counts (percent) for categorical variables and

mean (standard deviation) for continuous variables with 95% confidence intervals. We will report the proportion of complete CRFs as descriptive data.

### Analysis of definitive study primary outcome

The analysis and reporting of the trial will follow the CONSORT criteria(32). The primary analysis will compare the treatment groups on the overall 5-year survival. Two independent comparisons between treatment groups will be made using Cox regression models with time to the definitive primary endpoint(33). Results will be expressed as effect (ORs for binary outcomes, HRs for time-dependent outcomes and mean difference for continuous outcomes), corresponding 2-sided 95% CIs and associated p-values.

**Table 2.** Summary of Feasibility Outcomes Analysis Plan

| Objective                                                                            | Outcome                       | Criteria for success of feasibility          | Method of analysis                                                                                                                                  |
|--------------------------------------------------------------------------------------|-------------------------------|----------------------------------------------|-----------------------------------------------------------------------------------------------------------------------------------------------------|
| To determine the feasibility of conducting the multi-centre SAFETY international RCT | Recruitment Measure           | Enrollment of pilot sample within two years  | Descriptive statistics – reported as counts (percent) for categorical variables and means (standard deviation) for continuous variables with 95% CI |
|                                                                                      | Protocol Adherence Measure    | Protocol adherence of 85% or greater         |                                                                                                                                                     |
|                                                                                      | Participant Retention Measure | Loss-to-participant follow-up of 15% or less |                                                                                                                                                     |

|  |                                     |                                                                                                                                          |  |
|--|-------------------------------------|------------------------------------------------------------------------------------------------------------------------------------------|--|
|  | Maintenance of Data Quality Measure | Data completeness of 95% or greater for the definitive primary outcome<br>Data completeness of 85% or greater for the secondary outcomes |  |
|--|-------------------------------------|------------------------------------------------------------------------------------------------------------------------------------------|--|

### **Ethical considerations**

This study is to be conducted according to international standards of Good Clinical Practice, applicable government regulations, and institutional research policies and procedures. All study intervention phase (surveillance) arms fall within the spectrum of current standard practice, as do the standardized post-intervention phase follow-up visits. This trial has received *Pro Tempore* ethics approval from the McMaster / Hamilton Health Sciences Research Ethics Board on August 23<sup>rd</sup>, 2018. The study protocol will be submitted to a properly constituted independent ethics committee, in agreement with local legal prescriptions, for formal approval of the study conduct at each participating clinical site. A copy of this approval will be provided to the Methods Centre by each participating clinical site prior to the local commencement of the study.

## Study Timeline

We expect that the pilot study will take just over three years to complete. We estimate that recruitment will take approximately one year to complete per site. The initiation of screening and enrollment will likely be staggered across the participating clinical sites due to the variability in the time required to obtain ethics approval and negotiate institutional contracts. Therefore the pilot study recruitment timeline will be up to two years. We expect a further one year for all pilot participants to complete the intervention phase of the trial. Although we will not have complete post-intervention phase data for any pilot participants, we anticipate being able to determine feasibility at the end of the intervention phase based on our feasibility objectives. We plan *a priori* to transition directly from the pilot to the definitive study if feasibility is established.

## Data Safety Monitoring Board

As per the principles established by the *Data Monitoring Committees: Lessons, Ethics, Statistics (DAMOCLES) Study Group* charter, a DSMB will oversee the safety of the trial participants and the overall conduct of the trial. The Committee members will be independent of the trial, free of conflicts with any of the investigative team, and will consist of two orthopaedic oncologists, a medical oncologist, a radiologist, and a biostatistician. The DSMB will frequently review enrollment and demographic summaries, listings of protocol deviations, and summaries and listings of serious adverse events. They will advise the Principal Investigator and SAFETY study team on any concerns related to participant safety and trial conduct and will make recommendations for: A) study continuation as designed; B) study termination; C) study continuation with major or minor modifications; or D) temporary study suspension of enrollment until some uncertainty is resolved.

## Knowledge Dissemination

The results of the study will be submitted for publication regardless of whether there are significant findings, as well as posted on [ClinicalTrials.gov](https://www.clinicaltrials.gov/). In addition to scientific manuscripts and presentations, we plan to prepare study reports and press releases for patients and other stakeholders that are transparent, and that the language is understandable to the general public.

## Potential impact of the study

The benefit of this pilot study would be to determine the feasibility of the SAFETY trial. This is essential prior to undertaking a large multi-centre RCT. Experience gained during the pilot study will provide insight into methods to increase enrollment, strategies to maintain protocol adherence and the adjustment of recruitment expectations. In addition, the ultimate success of the pilot study will support funding requests for the definitive study of the multi-centre SAFETY trial.

Once the feasibility endpoints are reached, we will transition directly into and begin recruiting for the definitive SAFETY trial. The ultimate goal of the SAFETY trial is to provide high-quality evidence for surveillance strategies following the treatment of STS, which will allow for the development of evidence-based clinical practice guidelines for sarcoma patients worldwide.

## References

1. Pervaiz N, Colterjohn N, Farrokhyar F, Tozer R, Figueredo A, Ghert M. A systematic meta-analysis of randomized controlled trials of adjuvant chemotherapy for localized resectable soft-tissue sarcoma. *Cancer*. 2008;113(3):573-81.
2. Whooley BP, Mooney MM, Gibbs JF, Kraybill WG. Effective follow-up strategies in soft tissue sarcoma. *Seminars in surgical oncology*. 1999;17(1):83-7.

3. Whooley BP, Gibbs JF, Mooney MM, McGrath BE, Kraybill WG. Primary extremity sarcoma: what is the appropriate follow-up? *Annals of surgical oncology*. 2000;7(1):9-14.
4. Kane JM, 3rd. Surveillance strategies for patients following surgical resection of soft tissue sarcomas. *Current opinion in oncology*. 2004;16(4):328-32.
5. Gadd MA, Casper ES, Woodruff JM, McCormack PM, Brennan MF. Development and treatment of pulmonary metastases in adult patients with extremity soft tissue sarcoma. *Annals of surgery*. 1993;218(6):705-12.
6. Huth JF, Eilber FR. Patterns of metastatic spread following resection of extremity soft-tissue sarcomas and strategies for treatment. *Seminars in surgical oncology*. 1988;4(1):20-6.
7. Songur N, Dinc M, Ozdilekcan C, Eke S, Ok U, Oz M. Analysis of lung metastases in patients with primary extremity sarcoma. *Sarcoma*. 2003;7(2):63-7.
8. Group ESESNW. Bone sarcomas: ESMO Clinical Practice Guidelines for diagnosis, treatment and follow-up. *Annals of oncology : official journal of the European Society for Medical Oncology*. 2014;25 Suppl 3:iii113-23.
9. Group ESESNW. Soft tissue and visceral sarcomas: ESMO Clinical Practice Guidelines for diagnosis, treatment and follow-up. *Annals of oncology : official journal of the European Society for Medical Oncology*. 2014;25 Suppl 3:iii102-12.
10. Gerrand CH, Billingham LJ, Woll PJ, Grimer RJ. Follow up after Primary Treatment of Soft Tissue Sarcoma: A Survey of Current Practice in the United Kingdom. *Sarcoma*. 2007;2007:34128.
11. Greenberg DD, Crawford B. Surveillance Strategies for Sarcoma: Results of a Survey of Members of the Musculoskeletal Tumor Society. *Sarcoma*. 2016;2016:8289509.
12. Ries Z, Gibbs CP, Jr., Scarborough MT, Miller BJ. Pulmonary Surveillance Strategies Following Sarcoma Excision Vary Among Orthopedic Oncologists: A Survey of the Musculoskeletal Tumor Society. *The Iowa orthopaedic journal*. 2016;36:109-16.
13. von Mehren M, Randall RL, Benjamin RS, Boles S, Bui MM, Ganjoo KN, et al. Soft Tissue Sarcoma, Version 2.2018, NCCN Clinical Practice Guidelines in Oncology. *Journal of the National Comprehensive Cancer Network : JNCCN*. 2018;16(5):536-63.
14. Bozzo A GM, Baldawi H, Simchovich G. Optimal surveillance strategies following curative surgery for extremity sarcoma: A systematic review of randomized control trials. *Open Science Framework*. 2018(May).
15. Puri A, Gulia A, Hawaldar R, Ranganathan P, Badwe RA. Does intensity of surveillance affect survival after surgery for sarcomas? Results of a randomized noninferiority trial. *Clinical orthopaedics and related research*. 2014;472(5):1568-75.
16. Puri A, Ranganathan P, Gulia A, Crasto S, Hawaldar R, Badwe RA. Does a less intensive surveillance protocol affect the survival of patients after treatment of a sarcoma of the limb? updated results of the randomized TOSS study. *The bone & joint journal*. 2018;100-B(2):262-8.
17. Goel A, Christy ME, Virgo KS, Kraybill WG, Johnson FE. Costs of follow-up after potentially curative treatment for extremity soft-tissue sarcoma. *International journal of oncology*. 2004;25(2):429-35.
18. Longo CJ, Deber R, Fitch M, Williams AP, D'Souza D. An examination of cancer patients' monthly 'out-of-pocket' costs in Ontario, Canada. *European journal of cancer care*. 2007;16(6):500-7.
19. Hopkins RB, Goeree R, Longo CJ. Estimating the national wage loss from cancer in Canada. *Current oncology*. 2010;17(2):40-9.



- 1
- 2
- 3
- 4 20. Nipp RD, Zullig LL, Samsa G, Peppercorn JM, Schrag D, Taylor DH, Jr., et al. Identifying cancer patients who alter care or lifestyle due to treatment-related financial distress. *Psycho-oncology*. 2016;25(6):719-25.
- 5
- 6
- 7 21. Thompson CA, Charlson ME, Schenkein E, Wells MT, Furman RR, Elstrom R, et al. Surveillance CT scans are a source of anxiety and fear of recurrence in long-term lymphoma survivors. *Annals of oncology : official journal of the European Society for Medical Oncology*. 2010;21(11):2262-6.
- 8
- 9
- 10
- 11 22. Thomas S, Glynne-Jones R, Chait I. Is it worth the wait? A survey of patients' satisfaction with an oncology outpatient clinic. *European journal of cancer*. 1997;6(1):50-8.
- 12
- 13 23. Brenner DJ, Hall EJ. Computed tomography--an increasing source of radiation exposure. *The New England journal of medicine*. 2007;357(22):2277-84.
- 14
- 15 24. Schneider PJ, Evaniew N, McKay P, Ghert M. Moving Forward Through Consensus: A Modified Delphi Approach to Determine the Top Research Priorities in Orthopaedic Oncology. *Clinical orthopaedics and related research*. 2017;475(12):3044-55.
- 16
- 17 25. Freidlin B, Korn EL. Two-by-Two Factorial Cancer Treatment Trials: Is Sufficient Attention Being Paid to Possible Interactions? *Journal of the National Cancer Institute*. 2017;109(9).
- 18
- 19
- 20 26. Moore CG, Carter RE, Nietert PJ, Stewart PW. Recommendations for planning pilot studies in clinical and translational research. *Clinical and translational science*. 2011;4(5):332-7.
- 21
- 22 27. Investigators P. Prophylactic antibiotic regimens in tumour surgery (PARITY): a pilot multicentre randomised controlled trial. *Bone & joint research*. 2015;4(9):154-62.
- 23
- 24 28. Zelle BA, Bhandari M, Sanchez AI, Probst C, Pape HC. Loss of follow-up in orthopaedic trauma: is 80% follow-up still acceptable? *Journal of orthopaedic trauma*. 2013;27(3):177-81.
- 25
- 26 29. Thabane L, Ma J, Chu R, Cheng J, Ismaila A, Rios LP, et al. A tutorial on pilot studies: the what, why and how. *BMC medical research methodology*. 2010;10:1.
- 27
- 28 30. Ellis LM, Bernstein DS, Voest EE, Berlin JD, Sargent D, Cortazar P, et al. American Society of Clinical Oncology perspective: Raising the bar for clinical trials by defining clinically meaningful outcomes. *Journal of clinical oncology : official journal of the American Society of Clinical Oncology*. 2014;32(12):1277-80.
- 29
- 30 31. Leon AC, Davis LL, Kraemer HC. The role and interpretation of pilot studies in clinical research. *Journal of psychiatric research*. 2011;45(5):626-9.
- 31
- 32 32. Moher D, Schulz KF, Altman DG. The CONSORT statement: revised recommendations for improving the quality of reports of parallel-group randomised trials. *Lancet*. 2001;357(9263):1191-4.
- 33
- 34 33. Montgomery AA, Peters TJ, Little P. Design, analysis and presentation of factorial randomised controlled trials. *BMC medical research methodology*. 2003;3:26.
- 35
- 36
- 37
- 38
- 39
- 40
- 41
- 42
- 43
- 44
- 45
- 46
- 47
- 48
- 49
- 50
- 51
- 52
- 53
- 54
- 55
- 56
- 57
- 58
- 59
- 60

## Figure legend

Figure 1. Study flow diagram

## Data statement

All data from this work will be maintained in security and confidentiality at the Methods Centre at McMaster University. Access to additional unpublished data will be reviewed on a case-by-case basis and will accord with the guidelines of our local institutional research ethics board.

## Authors' contributions

- Substantial contributions to the conception or design of the work; or the acquisition, analysis, or interpretation of data for the work: Michelle Ghert; Mohit Bhandari; Anthony Bozzo; P.D. Sander Dijkstra; Anthony Griffin; Robert Grimer; James Hayden; Arlene Manherz; Karim Masrouha; Paula McKay; Benjamin Miller; Naveen Parasu; Ajay Puri; R. Lor Randall; Patricia Schneider; Sheila Sprague; Nina Szpakowski; Lehana Thabane; Robert Turcotte; Roberto Vélez; David Wilson; Kevin Zbuk; Gordon Guyatt
- Drafting the work: Michelle Ghert, Patricia Schneider, and Karim Masrouha
- Revising it critically for important intellectual content: Michelle Ghert; Mohit Bhandari; Anthony Bozzo; P.D. Sander Dijkstra; Anthony Griffin; Robert Grimer; James Hayden; Arlene Manherz; Karim Masrouha; Paula McKay; Benjamin Miller; Naveen Parasu; Ajay Puri; R. Lor Randall; Patricia Schneider; Sheila Sprague; Nina Szpakowski; Lehana Thabane; Robert Turcotte; Roberto Vélez; David Wilson; Kevin Zbuk; Gordon Guyatt
- Final approval of the version to be published: Michelle Ghert; Mohit Bhandari; Anthony Bozzo; P.D. Sander Dijkstra; Anthony Griffin; Robert Grimer; James Hayden; Arlene Manherz; Karim Masrouha; Paula McKay; Benjamin Miller; Naveen Parasu; Ajay Puri; R. Lor Randall; Patricia Schneider; Sheila Sprague; Nina Szpakowski; Lehana Thabane; Robert Turcotte; Roberto Vélez; David Wilson; Kevin Zbuk; Gordon Guyatt

- Agreement to be accountable for all aspects of the work in ensuring that questions related to the accuracy or integrity of any part of the work are appropriately investigated and resolved: Michelle Ghert; Mohit Bhandari; Anthony Bozzo; P.D. Sander Dijkstra; Anthony Griffin; Robert Grimer; James Hayden; Arlene Manherz; Karim Masrouha; Paula McKay; Benjamin Miller; Naveen Parasu; Ajay Puri; R. Lor Randall; Patricia Schneider; Sheila Sprague; Nina Szpakowski; Lehana Thabane; Robert Turcotte; Roberto Vélez; David Wilson; Kevin Zbuk; Gordon Guyatt

## **Acknowledgement**

We would like to thank our patient advisers, Nina Szpakowski and Arlene Manherz, for their contributions.

## **Funding**

This research is supported by funding through the Hamilton Academic Health Science Organization (HAHSO) and the Canadian Cancer Society Research Institute (CCSRI) Innovation Grants.

## **Competing interests statement**

Dr. Bhandari, Dr. Ghert, Dr. Randall, and Dr. Hayden report personal fees from consultancy and/or royalties outside the submitted work.

## **Word count**

5,205

1  
2  
3  
4  
5  
6  
7  
8  
9  
10  
11  
12  
13  
14  
15  
16  
17  
18  
19  
20  
21  
22  
23  
24  
25  
26  
27  
28  
29  
30  
31  
32  
33  
34  
35  
36  
37  
38  
39  
40  
41  
42  
43  
44  
45  
46  
47  
48  
49  
50  
51  
52  
53  
54  
55  
56  
57  
58  
59  
60

**Figure 1.**

M = month; CXR = chest X-ray; CT = computed tomography



Study flow diagram

146x146mm (300 x 300 DPI)

# Reporting checklist for protocol of a clinical trial.

Based on the SPIRIT guidelines.

## Instructions to authors

Complete this checklist by entering the page numbers from your manuscript where readers will find each of the items listed below.

Your article may not currently address all the items on the checklist. Please modify your text to include the missing information. If you are certain that an item does not apply, please write "n/a" and provide a short explanation.

Upload your completed checklist as an extra file when you submit to a journal.

In your methods section, say that you used the SPIRIT reporting guidelines, and cite them as:

Chan A-W, Tetzlaff JM, Altman DG, Laupacis A, Gøtzsche PC, Krleža-Jerić K, Hróbjartsson A, Mann H, Dickersin K, Berlin J, Doré C, Parulekar W, Summerskill W, Groves T, Schulz K, Sox H, Rockhold FW, Rennie D, Moher D. SPIRIT 2013 Statement: Defining standard protocol items for clinical trials. *Ann Intern Med.* 2013;158(3):200-207

Page

Number

Reporting Item

|      |                                                             |   |
|------|-------------------------------------------------------------|---|
| T #  | Descriptive title identifying the study design, population, | 1 |
| it 1 | interventions, and, if applicable, trial acronym            |   |
| l    |                                                             |   |
| e    |                                                             |   |

1 T # Trial identifier and registry name. If not yet registered, N/A  
2  
3 ri 2 name of intended registry  
4 a a  
5 l  
6 r  
7 e  
8 g  
9 is  
10 tr  
11 a  
12 ti  
13 o  
14 n  
15  
16  
17  
18  
19  
20  
21

22 T # All items from the World Health Organization Trial N/A  
23 ri 2 Registration Data Set  
24 a b  
25 l  
26 r  
27 e  
28 g  
29 is  
30 tr  
31 a  
32 ti  
33 o  
34 n  
35 :  
36 d  
37 a  
38 t  
39 a  
40 s  
41 e  
42 t  
43  
44  
45  
46  
47  
48  
49  
50  
51  
52  
53  
54  
55  
56  
57  
58  
59  
60

1 P # Date and version identifier 1  
 2  
 3 r 3  
 4 o  
 5 t  
 6 o  
 7 c  
 8 o  
 9 l  
 10 l  
 11 v  
 12 e  
 13 r  
 14 si  
 15 o  
 16 n

23 F # Sources and types of financial, material, and other support HAHSO  
 24 u 4  
 25 n  
 26 d  
 27 i  
 28 n  
 29 g  
 30  
 31  
 32  
 33  
 34  
 35  
 36  
 37  
 38  
 39  
 40  
 41  
 42  
 43  
 44  
 45  
 46  
 47  
 48  
 49  
 50  
 51  
 52  
 53  
 54  
 55  
 56  
 57  
 58  
 59  
 60

1 R # Names, affiliations, and roles of protocol contributors 2,3,28  
2  
3 o 5  
4 l a  
5  
6 e  
7 s  
8 a  
9 n  
10 d  
11 r  
12 e  
13 s  
14 p  
15 o  
16 n  
17 si  
18 b  
19 il  
20 it  
21 i  
22 e  
23 s:  
24 c  
25 o  
26 n  
27 tr  
28 i  
29 b  
30 u  
31 t  
32 o  
33 r  
34 s  
35 h  
36 i  
37 p



|    |     |                                                    |     |
|----|-----|----------------------------------------------------|-----|
| 1  | R # | Name and contact information for the trial sponsor | N/A |
| 2  |     |                                                    |     |
| 3  | o   | 5                                                  |     |
| 4  | l   | b                                                  |     |
| 5  |     |                                                    |     |
| 6  | e   |                                                    |     |
| 7  | s   |                                                    |     |
| 8  | a   |                                                    |     |
| 9  | n   |                                                    |     |
| 10 | d   |                                                    |     |
| 11 | r   |                                                    |     |
| 12 | e   |                                                    |     |
| 13 | s   |                                                    |     |
| 14 | p   |                                                    |     |
| 15 | o   |                                                    |     |
| 16 | n   |                                                    |     |
| 17 | si  |                                                    |     |
| 18 | b   |                                                    |     |
| 19 | il  |                                                    |     |
| 20 | it  |                                                    |     |
| 21 | i   |                                                    |     |
| 22 | e   |                                                    |     |
| 23 | s:  |                                                    |     |
| 24 | s   |                                                    |     |
| 25 | p   |                                                    |     |
| 26 | o   |                                                    |     |
| 27 | n   |                                                    |     |
| 28 | s   |                                                    |     |
| 29 | o   |                                                    |     |
| 30 | r   |                                                    |     |
| 31 | c   |                                                    |     |
| 32 | o   |                                                    |     |
| 33 | n   |                                                    |     |
| 34 | t   |                                                    |     |
| 35 | a   |                                                    |     |
| 36 | c   |                                                    |     |
| 37 | t   |                                                    |     |
| 38 | i   |                                                    |     |
| 39 | n   |                                                    |     |
| 40 | f   |                                                    |     |
| 41 |     |                                                    |     |
| 42 |     |                                                    |     |
| 43 |     |                                                    |     |
| 44 |     |                                                    |     |
| 45 |     |                                                    |     |
| 46 |     |                                                    |     |
| 47 |     |                                                    |     |
| 48 |     |                                                    |     |
| 49 |     |                                                    |     |
| 50 |     |                                                    |     |
| 51 |     |                                                    |     |
| 52 |     |                                                    |     |
| 53 |     |                                                    |     |
| 54 |     |                                                    |     |
| 55 |     |                                                    |     |
| 56 |     |                                                    |     |
| 57 |     |                                                    |     |
| 58 |     |                                                    |     |
| 59 |     |                                                    |     |
| 60 |     |                                                    |     |

o  
r  
m  
a  
t  
i  
o  
n

1  
2  
3  
4  
5  
6  
7  
8  
9  
10  
11  
12  
13  
14  
15  
16  
17  
18  
19  
20  
21  
22  
23  
24  
25  
26  
27  
28  
29  
30  
31  
32  
33  
34  
35  
36  
37  
38  
39  
40  
41  
42  
43  
44  
45  
46  
47  
48  
49  
50  
51  
52  
53  
54  
55  
56  
57  
58  
59  
60

|    |     |                                                             |     |
|----|-----|-------------------------------------------------------------|-----|
| 1  | R # | Role of study sponsor and funders, if any, in study design; | N/A |
| 2  |     |                                                             |     |
| 3  | o 5 | collection, management, analysis, and interpretation of     |     |
| 4  | l c | data; writing of the report; and the decision to submit the |     |
| 5  |     | report for publication, including whether they will have    |     |
| 6  | e   | ultimate authority over any of these activities             |     |
| 7  | s   |                                                             |     |
| 8  | a   |                                                             |     |
| 9  |     |                                                             |     |
| 10 | n   |                                                             |     |
| 11 |     |                                                             |     |
| 12 | d   |                                                             |     |
| 13 |     |                                                             |     |
| 14 | r   |                                                             |     |
| 15 | e   |                                                             |     |
| 16 | s   |                                                             |     |
| 17 |     |                                                             |     |
| 18 | p   |                                                             |     |
| 19 |     |                                                             |     |
| 20 | o   |                                                             |     |
| 21 | n   |                                                             |     |
| 22 | si  |                                                             |     |
| 23 | b   |                                                             |     |
| 24 |     |                                                             |     |
| 25 | il  |                                                             |     |
| 26 |     |                                                             |     |
| 27 | it  |                                                             |     |
| 28 | i   |                                                             |     |
| 29 | e   |                                                             |     |
| 30 |     |                                                             |     |
| 31 | s:  |                                                             |     |
| 32 | s   |                                                             |     |
| 33 |     |                                                             |     |
| 34 | p   |                                                             |     |
| 35 |     |                                                             |     |
| 36 | o   |                                                             |     |
| 37 | n   |                                                             |     |
| 38 |     |                                                             |     |
| 39 | s   |                                                             |     |
| 40 |     |                                                             |     |
| 41 | o   |                                                             |     |
| 42 | r   |                                                             |     |
| 43 |     |                                                             |     |
| 44 | a   |                                                             |     |
| 45 | n   |                                                             |     |
| 46 |     |                                                             |     |
| 47 | d   |                                                             |     |
| 48 |     |                                                             |     |
| 49 | f   |                                                             |     |
| 50 |     |                                                             |     |
| 51 | u   |                                                             |     |
| 52 |     |                                                             |     |
| 53 | n   |                                                             |     |
| 54 |     |                                                             |     |
| 55 | d   |                                                             |     |
| 56 |     |                                                             |     |
| 57 | e   |                                                             |     |
| 58 |     |                                                             |     |
| 59 | r   |                                                             |     |
| 60 |     |                                                             |     |

1 R # Composition, roles, and responsibilities of the coordinating 18, 24, 25  
2  
3 o 5 centre, steering committee, endpoint adjudication  
4 l d committee, data management team, and other individuals or  
5 e groups overseeing the trial, if applicable (see Item 21a for  
6 s data monitoring committee)  
7  
8 a  
9  
10 n  
11  
12 d  
13  
14 r  
15 e  
16 s  
17  
18 p  
19 o  
20 n  
21  
22 si  
23 b  
24 il  
25 it  
26 i  
27 e  
28 s:  
29 c  
30 o  
31 m  
32 m  
33 it  
34 t  
35 e  
36 e  
37 s

6, 7, 8

B # Description of research question and justification for

a 6 undertaking the trial, including summary of relevant studies

c a (published and unpublished) examining benefits and harms

k for each intervention

g

r

o

u

n

d

a

n

d

r

a

ti

o

n

a

l

e

6

1 B # Explanation for choice of comparators

2 a 6

3 c b

4 k

5 g

6 r

7 o

8 u

9 n

10 d

11 a

12 n

13 d

14 r

15 a

16 ti

17 o

18 n

19 a

20 l

21 e

22 :

23 c

24 h

25 o

26 i

27 c

28 e

29 o

30 f

31 c

32 o

33 m

34 p

35 a

36 r

37 a

38 t

39

40

1 O  
2 r  
3  
4 s  
5  
6  
7  
8  
9  
10  
11  
12  
13  
14  
15  
16  
17  
18  
19  
20  
21  
22  
23  
24  
25  
26  
27  
28  
29  
30  
31  
32  
33  
34  
35  
36  
37  
38  
39  
40  
41  
42  
43  
44  
45  
46  
47  
48  
49  
50  
51  
52  
53  
54  
55  
56  
57  
58  
59  
60

|    |     |                                                                   |           |
|----|-----|-------------------------------------------------------------------|-----------|
| 1  | O # | Specific objectives or hypotheses                                 | 9, 10, 11 |
| 2  |     |                                                                   |           |
| 3  | b   | 7                                                                 |           |
| 4  | j   |                                                                   |           |
| 5  | e   |                                                                   |           |
| 6  | c   |                                                                   |           |
| 7  | t   |                                                                   |           |
| 8  | i   |                                                                   |           |
| 9  | v   |                                                                   |           |
| 10 | e   |                                                                   |           |
| 11 | s   |                                                                   |           |
| 12 |     |                                                                   |           |
| 13 |     |                                                                   |           |
| 14 |     |                                                                   |           |
| 15 |     |                                                                   |           |
| 16 | T # | Description of trial design including type of trial (eg,          | 9         |
| 17 |     |                                                                   |           |
| 18 | ri  | 8 parallel group, crossover, factorial, single group), allocation |           |
| 19 | a   | ratio, and framework (eg, superiority, equivalence, non-          |           |
| 20 |     | inferiority, exploratory)                                         |           |
| 21 | l   |                                                                   |           |
| 22 | d   |                                                                   |           |
| 23 | e   |                                                                   |           |
| 24 | si  |                                                                   |           |
| 25 | g   |                                                                   |           |
| 26 | n   |                                                                   |           |
| 27 |     |                                                                   |           |
| 28 |     |                                                                   |           |
| 29 |     |                                                                   |           |
| 30 |     |                                                                   |           |
| 31 | S # | Description of study settings (eg, community clinic,              | 11        |
| 32 |     |                                                                   |           |
| 33 | t   | 9 academic hospital) and list of countries where data will be     |           |
| 34 | u   | collected. Reference to where list of study sites can be          |           |
| 35 |     | obtained                                                          |           |
| 36 | d   |                                                                   |           |
| 37 | y   |                                                                   |           |
| 38 | s   |                                                                   |           |
| 39 | e   |                                                                   |           |
| 40 | tt  |                                                                   |           |
| 41 | i   |                                                                   |           |
| 42 | n   |                                                                   |           |
| 43 | g   |                                                                   |           |
| 44 |     |                                                                   |           |
| 45 |     |                                                                   |           |
| 46 |     |                                                                   |           |
| 47 |     |                                                                   |           |
| 48 |     |                                                                   |           |
| 49 |     |                                                                   |           |
| 50 |     |                                                                   |           |
| 51 |     |                                                                   |           |
| 52 |     |                                                                   |           |
| 53 |     |                                                                   |           |
| 54 |     |                                                                   |           |
| 55 |     |                                                                   |           |
| 56 |     |                                                                   |           |
| 57 |     |                                                                   |           |
| 58 |     |                                                                   |           |
| 59 |     |                                                                   |           |
| 60 |     |                                                                   |           |



|    |      |                                                              |    |
|----|------|--------------------------------------------------------------|----|
| 1  | E #  | Inclusion and exclusion criteria for participants. If        | 12 |
| 2  |      |                                                              |    |
| 3  | li 1 | applicable, eligibility criteria for study centres and       |    |
| 4  | g 0  | individuals who will perform the interventions (eg,          |    |
| 5  |      |                                                              |    |
| 6  | i    | surgeons, psychotherapists)                                  |    |
| 7  | b    |                                                              |    |
| 8  |      |                                                              |    |
| 9  | il   |                                                              |    |
| 10 | it   |                                                              |    |
| 11 |      |                                                              |    |
| 12 | y    |                                                              |    |
| 13 | c    |                                                              |    |
| 14 |      |                                                              |    |
| 15 | ri   |                                                              |    |
| 16 | t    |                                                              |    |
| 17 |      |                                                              |    |
| 18 | e    |                                                              |    |
| 19 | ri   |                                                              |    |
| 20 |      |                                                              |    |
| 21 | a    |                                                              |    |
| 22 |      |                                                              |    |
| 23 |      |                                                              |    |
| 24 | I #  | Interventions for each group with sufficient detail to allow | 14 |
| 25 | n 1  | replication, including how and when they will be             |    |
| 26 | t 1  | administered                                                 |    |
| 27 |      |                                                              |    |
| 28 | e a  |                                                              |    |
| 29 |      |                                                              |    |
| 30 | r    |                                                              |    |
| 31 | v    |                                                              |    |
| 32 |      |                                                              |    |
| 33 | e    |                                                              |    |
| 34 | n    |                                                              |    |
| 35 |      |                                                              |    |
| 36 | ti   |                                                              |    |
| 37 | o    |                                                              |    |
| 38 |      |                                                              |    |
| 39 | n    |                                                              |    |
| 40 | s:   |                                                              |    |
| 41 | d    |                                                              |    |
| 42 |      |                                                              |    |
| 43 | e    |                                                              |    |
| 44 |      |                                                              |    |
| 45 | s    |                                                              |    |
| 46 | c    |                                                              |    |
| 47 |      |                                                              |    |
| 48 | ri   |                                                              |    |
| 49 | p    |                                                              |    |
| 50 |      |                                                              |    |
| 51 | ti   |                                                              |    |
| 52 | o    |                                                              |    |
| 53 |      |                                                              |    |
| 54 | n    |                                                              |    |
| 55 |      |                                                              |    |
| 56 |      |                                                              |    |
| 57 |      |                                                              |    |
| 58 |      |                                                              |    |
| 59 |      |                                                              |    |
| 60 |      |                                                              |    |

1 I # Criteria for discontinuing or modifying allocated N/A  
2  
3 n 1 interventions for a given trial participant (eg, drug dose  
4 t 1 change in response to harms, participant request, or  
5 e b improving / worsening disease)  
6  
7 r  
8 v  
9  
10 e  
11 n  
12 ti  
13 o  
14 n  
15 s:  
16 m  
17 o  
18 d  
19 if  
20 i  
21 c  
22 a  
23 ti  
24 o  
25 n  
26 s  
27  
28  
29  
30  
31  
32  
33  
34  
35  
36  
37  
38  
39  
40  
41  
42  
43  
44  
45  
46  
47  
48  
49  
50  
51  
52  
53  
54  
55  
56  
57  
58  
59  
60

1 I # Strategies to improve adherence to intervention protocols, 19, 20  
2  
3 n 1 and any procedures for monitoring adherence (eg, drug  
4 t 1 tablet return; laboratory tests)  
5  
6 e c  
7  
8 r  
9  
10 v  
11 e  
12 n  
13 ti  
14 o  
15 n  
16 s:  
17 a  
18 d  
19 h  
20 e  
21 r  
22 a  
23 n  
24 c  
25 e  
26  
27  
28  
29  
30  
31  
32  
33  
34  
35  
36  
37  
38  
39  
40  
41  
42  
43  
44  
45  
46  
47  
48  
49  
50  
51  
52  
53  
54  
55  
56  
57  
58  
59  
60

|    |     |                                                              |            |
|----|-----|--------------------------------------------------------------|------------|
| 1  | I # | Relevant concomitant care and interventions that are         | 12, 13     |
| 2  |     |                                                              |            |
| 3  | n 1 | permitted or prohibited during the trial                     |            |
| 4  | t 1 |                                                              |            |
| 5  | e d |                                                              |            |
| 6  |     |                                                              |            |
| 7  | r   |                                                              |            |
| 8  | v   |                                                              |            |
| 9  |     |                                                              |            |
| 10 | e   |                                                              |            |
| 11 | n   |                                                              |            |
| 12 | n   |                                                              |            |
| 13 | ti  |                                                              |            |
| 14 | o   |                                                              |            |
| 15 | n   |                                                              |            |
| 16 | s:  |                                                              |            |
| 17 | c   |                                                              |            |
| 18 | o   |                                                              |            |
| 19 | n   |                                                              |            |
| 20 | c   |                                                              |            |
| 21 | o   |                                                              |            |
| 22 | n   |                                                              |            |
| 23 | c   |                                                              |            |
| 24 | o   |                                                              |            |
| 25 | m   |                                                              |            |
| 26 | it  |                                                              |            |
| 27 | a   |                                                              |            |
| 28 | n   |                                                              |            |
| 29 | t   |                                                              |            |
| 30 | c   |                                                              |            |
| 31 | a   |                                                              |            |
| 32 | r   |                                                              |            |
| 33 | e   |                                                              |            |
| 34 |     |                                                              |            |
| 35 |     |                                                              |            |
| 36 |     |                                                              |            |
| 37 |     |                                                              |            |
| 38 |     |                                                              |            |
| 39 |     |                                                              |            |
| 40 |     |                                                              |            |
| 41 | O # | Primary, secondary, and other outcomes, including the        | See note 1 |
| 42 | u 1 | specific measurement variable (eg, systolic blood pressure), |            |
| 43 | t 2 | analysis metric (eg, change from baseline, final value, time |            |
| 44 | c   | to event), method of aggregation (eg, median, proportion),   |            |
| 45 | o   | and time point for each outcome. Explanation of the clinical |            |
| 46 | m   | relevance of chosen efficacy and harm outcomes is strongly   |            |
| 47 | e   | recommended                                                  |            |
| 48 | s   |                                                              |            |
| 49 |     |                                                              |            |
| 50 |     |                                                              |            |
| 51 |     |                                                              |            |
| 52 |     |                                                              |            |
| 53 |     |                                                              |            |
| 54 |     |                                                              |            |
| 55 |     |                                                              |            |
| 56 |     |                                                              |            |
| 57 |     |                                                              |            |
| 58 |     |                                                              |            |
| 59 |     |                                                              |            |
| 60 |     |                                                              |            |

|    |    |   |                                                            |        |
|----|----|---|------------------------------------------------------------|--------|
| 1  | P  | # | Time schedule of enrolment, interventions (including any   | 24     |
| 2  |    |   |                                                            |        |
| 3  | a  | 1 | run-ins and washouts), assessments, and visits for         |        |
| 4  | rt | 3 | participants. A schematic diagram is highly recommended    |        |
| 5  |    |   | (see Figure)                                               |        |
| 6  | i  |   |                                                            |        |
| 7  | c  |   |                                                            |        |
| 8  |    |   |                                                            |        |
| 9  | i  |   |                                                            |        |
| 10 |    |   |                                                            |        |
| 11 | P  |   |                                                            |        |
| 12 | a  |   |                                                            |        |
| 13 | n  |   |                                                            |        |
| 14 |    |   |                                                            |        |
| 15 | t  |   |                                                            |        |
| 16 | ti |   |                                                            |        |
| 17 |    |   |                                                            |        |
| 18 | m  |   |                                                            |        |
| 19 | e  |   |                                                            |        |
| 20 | li |   |                                                            |        |
| 21 |    |   |                                                            |        |
| 22 | n  |   |                                                            |        |
| 23 |    |   |                                                            |        |
| 24 | e  |   |                                                            |        |
| 25 |    |   |                                                            |        |
| 26 |    |   |                                                            |        |
| 27 | S  | # | Estimated number of participants needed to achieve study   | 20, 21 |
| 28 | a  | 1 | objectives and how it was determined, including clinical   |        |
| 29 |    |   |                                                            |        |
| 30 | m  | 4 | and statistical assumptions supporting any sample size     |        |
| 31 | p  |   | calculations                                               |        |
| 32 |    |   |                                                            |        |
| 33 | l  |   |                                                            |        |
| 34 | e  |   |                                                            |        |
| 35 |    |   |                                                            |        |
| 36 | si |   |                                                            |        |
| 37 | z  |   |                                                            |        |
| 38 |    |   |                                                            |        |
| 39 | e  |   |                                                            |        |
| 40 |    |   |                                                            |        |
| 41 |    |   |                                                            |        |
| 42 | R  | # | Strategies for achieving adequate participant enrolment to | 13, 14 |
| 43 | e  | 1 | reach target sample size                                   |        |
| 44 |    |   |                                                            |        |
| 45 | c  | 5 |                                                            |        |
| 46 | r  |   |                                                            |        |
| 47 |    |   |                                                            |        |
| 48 | u  |   |                                                            |        |
| 49 | it |   |                                                            |        |
| 50 |    |   |                                                            |        |
| 51 | m  |   |                                                            |        |
| 52 | e  |   |                                                            |        |
| 53 |    |   |                                                            |        |
| 54 | n  |   |                                                            |        |
| 55 | t  |   |                                                            |        |
| 56 |    |   |                                                            |        |
| 57 |    |   |                                                            |        |
| 58 |    |   |                                                            |        |
| 59 |    |   |                                                            |        |
| 60 |    |   |                                                            |        |

1 A # Method of generating the allocation sequence (eg,  
2 ll 1 computer-generated random numbers), and list of any  
3 o 6 factors for stratification. To reduce predictability of a  
4 c a random sequence, details of any planned restriction (eg,  
5 a blocking) should be provided in a separate document that is  
6 ti unavailable to those who enrol participants or assign  
7 o interventions  
8  
9  
10  
11  
12  
13  
14  
15  
16  
17  
18  
19  
20  
21  
22  
23  
24  
25  
26  
27  
28  
29  
30  
31  
32  
33  
34  
35  
36  
37  
38  
39  
40  
41  
42  
43  
44  
45  
46  
47  
48  
49  
50  
51  
52  
53  
54  
55  
56  
57  
58  
59  
60

1 A # Mechanism of implementing the allocation sequence (eg,  
2 ll 1 central telephone; sequentially numbered, opaque, sealed  
3 o 6 envelopes), describing any steps to conceal the sequence  
4 c b until interventions are assigned  
5  
6 a  
7 ti  
8 o  
9 n  
10 c  
11 o  
12 n  
13 c  
14 o  
15 n  
16 c  
17 e  
18 a  
19 l  
20 m  
21 e  
22 n  
23 t  
24 m  
25 e  
26 c  
27 h  
28 a  
29 n  
30 is  
31 m

1 A # Who will generate the allocation sequence, who will enrol 14  
2 ll 1 participants, and who will assign participants to  
3 o 6 interventions

4 c c  
5  
6 a  
7 ti  
8 o  
9 n  
10 .  
11 i  
12 m  
13 p  
14 l  
15 e  
16 m  
17 e  
18 n  
19 t  
20 a  
21 ti  
22 o  
23 n

35 B # Who will be blinded after assignment to interventions (eg, 19  
36 li 1 trial participants, care providers, outcome assessors, data  
37 n 7 analysts), and how

40 d a  
41 i  
42 n  
43 g  
44 (  
45 m  
46 a  
47 s  
48 k  
49 i  
50 n



1 g  
2 )  
3  
4  
5  
6  
7  
8  
9  
10  
11  
12  
13  
14  
15  
16  
17  
18  
19  
20  
21  
22  
23  
24  
25  
26  
27  
28  
29  
30  
31  
32  
33  
34  
35  
36  
37  
38  
39  
40  
41  
42  
43  
44  
45  
46  
47  
48  
49  
50  
51  
52  
53  
54  
55  
56  
57  
58  
59  
60

1 B # If blinded, circumstances under which unblinding is N/A  
2  
3 li 1 permissible, and procedure for revealing a participant's  
4 n 7 allocated intervention during the trial  
5  
6 d b  
7  
8 i  
9 n  
10 g  
11 (  
12 m  
13 a  
14 s  
15 k  
16 i  
17 n  
18 g  
19 ):  
20 e  
21 m  
22 e  
23 r  
24 g  
25 e  
26 n  
27 c  
28 y  
29 u  
30 n  
31 b  
32 li  
33 n  
34 d  
35 i  
36 n  
37 g

N/A

1 D # Plans for assessment and collection of outcome, baseline,  
2  
3 a 1 and other trial data, including any related processes to  
4 t 8 promote data quality (eg, duplicate measurements, training  
5 a a of assessors) and a description of study instruments (eg,  
6 c questionnaires, laboratory tests) along with their reliability  
7 o and validity, if known. Reference to where data collection  
8 ll forms can be found, if not in the protocol  
9  
10  
11 e  
12  
13 c  
14 ti  
15 o  
16 n  
17 p  
18 l  
19 a  
20 n  
21  
22  
23  
24  
25  
26  
27  
28  
29  
30  
31  
32  
33  
34  
35  
36  
37  
38  
39  
40  
41  
42  
43  
44  
45  
46  
47  
48  
49  
50  
51  
52  
53  
54  
55  
56  
57  
58  
59  
60

1 D # Plans to promote participant retention and complete follow- 19  
2 a 1 up, including list of any outcome data to be collected for  
3 t 8 participants who discontinue or deviate from intervention  
4 a b protocols  
5  
6 c  
7  
8 o  
9  
10 ll  
11  
12 e  
13  
14 c  
15 ti  
16 o  
17  
18 n  
19 p  
20 l  
21 a  
22 n  
23 :  
24 r  
25 e  
26 t  
27 e  
28 n  
29 ti  
30 o  
31 n  
32  
33  
34  
35  
36  
37  
38  
39  
40  
41  
42  
43  
44  
45  
46  
47  
48  
49  
50  
51  
52  
53  
54  
55  
56  
57  
58  
59  
60

1 D # Plans for data entry, coding, security, and storage, including 24, 25  
2  
3 a 1 any related processes to promote data quality (eg, double  
4 t 9 data entry; range checks for data values). Reference to  
5  
6 a where details of data management procedures can be found,  
7 m if not in the protocol  
8  
9 a  
10 n  
11 a  
12 g  
13 e  
14 m  
15 e  
16 n  
17 t

23  
24 S # Statistical methods for analysing primary and secondary 22  
25 t 2 outcomes. Reference to where other details of the statistical  
26 a 0 analysis plan can be found, if not in the protocol  
27  
28 ti a  
29  
30 st  
31 i  
32 c  
33 s:  
34 o  
35 u  
36 t  
37 c  
38 o  
39 m  
40 e  
41 s

|    |    |   |                                                       |     |
|----|----|---|-------------------------------------------------------|-----|
| 1  | S  | # | Methods for any additional analyses (eg, subgroup and | N/A |
| 2  |    |   |                                                       |     |
| 3  | t  | 2 | adjusted analyses)                                    |     |
| 4  | a  | 0 |                                                       |     |
| 5  |    |   |                                                       |     |
| 6  | t  | i | b                                                     |     |
| 7  |    |   |                                                       |     |
| 8  | s  | t |                                                       |     |
| 9  |    |   |                                                       |     |
| 10 | i  |   |                                                       |     |
| 11 |    |   |                                                       |     |
| 12 | c  |   |                                                       |     |
| 13 |    |   |                                                       |     |
| 14 | s: |   |                                                       |     |
| 15 |    |   |                                                       |     |
| 16 | a  |   |                                                       |     |
| 17 |    |   |                                                       |     |
| 18 | d  |   |                                                       |     |
| 19 |    |   |                                                       |     |
| 20 | d  |   |                                                       |     |
| 21 |    |   |                                                       |     |
| 22 | i  |   |                                                       |     |
| 23 |    |   |                                                       |     |
| 24 | o  |   |                                                       |     |
| 25 |    |   |                                                       |     |
| 26 | n  |   |                                                       |     |
| 27 |    |   |                                                       |     |
| 28 | a  |   |                                                       |     |
| 29 |    |   |                                                       |     |
| 30 | l  |   |                                                       |     |
| 31 |    |   |                                                       |     |
| 32 | a  |   |                                                       |     |
| 33 |    |   |                                                       |     |
| 34 | n  |   |                                                       |     |
| 35 |    |   |                                                       |     |
| 36 | a  |   |                                                       |     |
| 37 |    |   |                                                       |     |
| 38 | l  |   |                                                       |     |
| 39 |    |   |                                                       |     |
| 40 | y  |   |                                                       |     |
| 41 |    |   |                                                       |     |
| 42 | s  |   |                                                       |     |
| 43 |    |   |                                                       |     |
| 44 | e  |   |                                                       |     |
| 45 |    |   |                                                       |     |
| 46 | s  |   |                                                       |     |
| 47 |    |   |                                                       |     |
| 48 |    |   |                                                       |     |
| 49 |    |   |                                                       |     |
| 50 |    |   |                                                       |     |
| 51 |    |   |                                                       |     |
| 52 |    |   |                                                       |     |
| 53 |    |   |                                                       |     |
| 54 |    |   |                                                       |     |
| 55 |    |   |                                                       |     |
| 56 |    |   |                                                       |     |
| 57 |    |   |                                                       |     |
| 58 |    |   |                                                       |     |
| 59 |    |   |                                                       |     |
| 60 |    |   |                                                       |     |

|    |    |   |                                                             |     |
|----|----|---|-------------------------------------------------------------|-----|
| 1  | S  | # | Definition of analysis population relating to protocol non- | N/A |
| 2  |    |   |                                                             |     |
| 3  | t  | 2 | adherence (eg, as randomised analysis), and any statistical |     |
| 4  | a  | 0 | methods to handle missing data (eg, multiple imputation)    |     |
| 5  |    |   |                                                             |     |
| 6  | t  | i | c                                                           |     |
| 7  |    |   |                                                             |     |
| 8  | s  | t |                                                             |     |
| 9  |    |   |                                                             |     |
| 10 | i  |   |                                                             |     |
| 11 |    |   |                                                             |     |
| 12 | c  |   |                                                             |     |
| 13 |    |   |                                                             |     |
| 14 | s: |   |                                                             |     |
| 15 |    |   |                                                             |     |
| 16 | a  |   |                                                             |     |
| 17 |    |   |                                                             |     |
| 18 | n  |   |                                                             |     |
| 19 |    |   |                                                             |     |
| 20 | a  |   |                                                             |     |
| 21 |    |   |                                                             |     |
| 22 | l  |   |                                                             |     |
| 23 |    |   |                                                             |     |
| 24 | y  |   |                                                             |     |
| 25 |    |   |                                                             |     |
| 26 | si |   |                                                             |     |
| 27 |    |   |                                                             |     |
| 28 | s  |   |                                                             |     |
| 29 |    |   |                                                             |     |
| 30 | p  |   |                                                             |     |
| 31 |    |   |                                                             |     |
| 32 | o  |   |                                                             |     |
| 33 |    |   |                                                             |     |
| 34 | p  |   |                                                             |     |
| 35 |    |   |                                                             |     |
| 36 | u  |   |                                                             |     |
| 37 |    |   |                                                             |     |
| 38 | l  |   |                                                             |     |
| 39 |    |   |                                                             |     |
| 40 | a  |   |                                                             |     |
| 41 |    |   |                                                             |     |
| 42 | ti |   |                                                             |     |
| 43 |    |   |                                                             |     |
| 44 | o  |   |                                                             |     |
| 45 |    |   |                                                             |     |
| 46 | n  |   |                                                             |     |
| 47 |    |   |                                                             |     |
| 48 | a  |   |                                                             |     |
| 49 |    |   |                                                             |     |
| 50 | n  |   |                                                             |     |
| 51 |    |   |                                                             |     |
| 52 | d  |   |                                                             |     |
| 53 |    |   |                                                             |     |
| 54 | m  |   |                                                             |     |
| 55 |    |   |                                                             |     |
| 56 | is |   |                                                             |     |
| 57 |    |   |                                                             |     |
| 58 | si |   |                                                             |     |
| 59 |    |   |                                                             |     |
| 60 | n  |   |                                                             |     |

24, 25

1 D # Composition of data monitoring committee (DMC);  
2  
3 a 2 summary of its role and reporting structure; statement of  
4 t 1 whether it is independent from the sponsor and competing  
5 a a interests; and reference to where further details about its  
6 m charter can be found, if not in the protocol. Alternatively,  
7 o an explanation of why a DMC is not needed  
8  
9  
10  
11  
12  
13  
14  
15  
16  
17  
18  
19  
20  
21  
22  
23  
24  
25  
26  
27  
28  
29  
30  
31  
32  
33  
34  
35  
36  
37  
38  
39  
40  
41  
42  
43  
44  
45  
46  
47  
48  
49  
50  
51  
52  
53  
54  
55  
56  
57  
58  
59  
60



|    |     |                                                              |        |
|----|-----|--------------------------------------------------------------|--------|
| 1  | D # | Description of any interim analyses and stopping             | N/A    |
| 2  |     |                                                              |        |
| 3  | a 2 | guidelines, including who will have access to these interim  |        |
| 4  | t 1 | results and make the final decision to terminate the trial   |        |
| 5  |     |                                                              |        |
| 6  | a b |                                                              |        |
| 7  | m   |                                                              |        |
| 8  |     |                                                              |        |
| 9  | o   |                                                              |        |
| 10 | n   |                                                              |        |
| 11 | it  |                                                              |        |
| 12 |     |                                                              |        |
| 13 | o   |                                                              |        |
| 14 | ri  |                                                              |        |
| 15 | n   |                                                              |        |
| 16 | g   |                                                              |        |
| 17 | :   |                                                              |        |
| 18 | i   |                                                              |        |
| 19 | n   |                                                              |        |
| 20 | t   |                                                              |        |
| 21 | e   |                                                              |        |
| 22 | ri  |                                                              |        |
| 23 | m   |                                                              |        |
| 24 | a   |                                                              |        |
| 25 | n   |                                                              |        |
| 26 | a   |                                                              |        |
| 27 | l   |                                                              |        |
| 28 | y   |                                                              |        |
| 29 | si  |                                                              |        |
| 30 | s   |                                                              |        |
| 31 |     |                                                              |        |
| 32 |     |                                                              |        |
| 33 |     |                                                              |        |
| 34 |     |                                                              |        |
| 35 |     |                                                              |        |
| 36 |     |                                                              |        |
| 37 |     |                                                              |        |
| 38 |     |                                                              |        |
| 39 |     |                                                              |        |
| 40 |     |                                                              |        |
| 41 | H # | Plans for collecting, assessing, reporting, and managing     | 24, 25 |
| 42 | a 2 | solicited and spontaneously reported adverse events and      |        |
| 43 | r 2 | other unintended effects of trial interventions or trial     |        |
| 44 | m   | conduct                                                      |        |
| 45 |     |                                                              |        |
| 46 | s   |                                                              |        |
| 47 |     |                                                              |        |
| 48 |     |                                                              |        |
| 49 |     |                                                              |        |
| 50 | A # | Frequency and procedures for auditing trial conduct, if any, | 24, 25 |
| 51 | u 2 | and whether the process will be independent from             |        |
| 52 | d 3 | investigators and the sponsor                                |        |
| 53 |     |                                                              |        |
| 54 | it  |                                                              |        |
| 55 | i   |                                                              |        |
| 56 |     |                                                              |        |
| 57 |     |                                                              |        |
| 58 |     |                                                              |        |
| 59 |     |                                                              |        |
| 60 |     |                                                              |        |

n  
g  
  
  
  
  
  
  
  
  
  
R # Plans for seeking research ethics committee / institutional  
e 2 review board (REC / IRB) approval  
s 4  
e  
a  
r  
c  
h  
e  
t  
h  
i  
c  
s  
a  
p  
p  
r  
o  
v  
a  
l

23, 24

|    |    |   |                                                              |        |
|----|----|---|--------------------------------------------------------------|--------|
| 1  | P  | # | Plans for communicating important protocol modifications     | N/A    |
| 2  |    |   |                                                              |        |
| 3  | r  | 2 | (eg, changes to eligibility criteria, outcomes, analyses) to |        |
| 4  |    |   |                                                              |        |
| 5  | o  | 5 | relevant parties (eg, investigators, REC / IRBs, trial       |        |
| 6  | t  |   | participants, trial registries, journals, regulators)        |        |
| 7  |    |   |                                                              |        |
| 8  | o  |   |                                                              |        |
| 9  | c  |   |                                                              |        |
| 10 |    |   |                                                              |        |
| 11 | o  |   |                                                              |        |
| 12 | l  |   |                                                              |        |
| 13 |    |   |                                                              |        |
| 14 | a  |   |                                                              |        |
| 15 | m  |   |                                                              |        |
| 16 | e  |   |                                                              |        |
| 17 | n  |   |                                                              |        |
| 18 |    |   |                                                              |        |
| 19 | d  |   |                                                              |        |
| 20 |    |   |                                                              |        |
| 21 | m  |   |                                                              |        |
| 22 | e  |   |                                                              |        |
| 23 |    |   |                                                              |        |
| 24 | n  |   |                                                              |        |
| 25 | ts |   |                                                              |        |
| 26 |    |   |                                                              |        |
| 27 |    |   |                                                              |        |
| 28 | C  | # | Who will obtain informed consent or assent from potential    | 13, 14 |
| 29 |    |   |                                                              |        |
| 30 | o  | 2 | trial participants or authorised surrogates, and how (see    |        |
| 31 |    |   |                                                              |        |
| 32 | n  | 6 | Item 32)                                                     |        |
| 33 | s  | a |                                                              |        |
| 34 | e  |   |                                                              |        |
| 35 |    |   |                                                              |        |
| 36 | n  |   |                                                              |        |
| 37 | t  |   |                                                              |        |
| 38 |    |   |                                                              |        |
| 39 | o  |   |                                                              |        |
| 40 |    |   |                                                              |        |
| 41 | r  |   |                                                              |        |
| 42 | a  |   |                                                              |        |
| 43 | s  |   |                                                              |        |
| 44 |    |   |                                                              |        |
| 45 | s  |   |                                                              |        |
| 46 | e  |   |                                                              |        |
| 47 |    |   |                                                              |        |
| 48 | n  |   |                                                              |        |
| 49 | t  |   |                                                              |        |
| 50 |    |   |                                                              |        |
| 51 |    |   |                                                              |        |
| 52 |    |   |                                                              |        |
| 53 |    |   |                                                              |        |
| 54 |    |   |                                                              |        |
| 55 |    |   |                                                              |        |
| 56 |    |   |                                                              |        |
| 57 |    |   |                                                              |        |
| 58 |    |   |                                                              |        |
| 59 |    |   |                                                              |        |
| 60 |    |   |                                                              |        |

1 C # Additional consent provisions for collection and use of N/A  
2  
3 o 2 participant data and biological specimens in ancillary  
4 n 6 studies, if applicable  
5  
6 s b  
7  
8 e  
9  
10 n  
11  
12 t  
13  
14 o  
15  
16 r  
17  
18 a  
19  
20 s  
21  
22 s  
23  
24 e  
25  
26 n  
27  
28 t:  
29  
30 a  
31  
32 n  
33  
34 c  
35  
36 il  
37  
38 l  
39  
40 a  
41  
42 r  
43  
44 y  
45  
46 st  
47  
48 u  
49  
50 d  
51  
52 i  
53  
54 e  
55  
56 s  
57  
58  
59  
60

1 C # How personal information about potential and enrolled 13, 14  
2  
3 o 2 participants will be collected, shared, and maintained in  
4 n 7 order to protect confidentiality before, during, and after the  
5 fi trial  
6

7 d  
8  
9 e  
10 n  
11 ti  
12 a  
13 li  
14 t  
15 y  
16  
17  
18  
19

20 D # Financial and other competing interests for principal 28  
21 e 2 investigators for the overall trial and each study site  
22 c 8  
23

24 l  
25 a  
26 r  
27 a  
28 ti  
29 o  
30 n  
31 o  
32 f  
33 i  
34 n  
35 t  
36 e  
37 r  
38 e  
39 st  
40 s  
41  
42  
43  
44  
45  
46  
47  
48  
49  
50

51  
52  
53  
54  
55  
56  
57  
58  
59  
60

1 D # Statement of who will have access to the final trial dataset, N/A  
2  
3 a 2 and disclosure of contractual agreements that limit such  
4 t 9 access for investigators  
5

6 a  
7 a  
8 c  
9 c  
10 c  
11 e  
12 s  
13 s  
14  
15

17 A # Provisions, if any, for ancillary and post-trial care, and for N/A  
18 n 3 compensation to those who suffer harm from trial  
19 c 0 participation  
20

21 il  
22 l  
23 a  
24 r  
25 y  
26 a  
27 n  
28 d  
29 p  
30 o  
31 st  
32 tr  
33 i  
34 a  
35 l  
36 c  
37 a  
38 r  
39 e  
40  
41  
42  
43  
44  
45  
46  
47  
48  
49  
50  
51  
52  
53  
54  
55  
56  
57  
58  
59  
60

N/A

D # Plans for investigators and sponsor to communicate trial  
is 3 results to participants, healthcare professionals, the public,  
s 1 and other relevant groups (eg, via publication, reporting in  
e a results databases, or other data sharing arrangements),  
m including any publication restrictions  
i  
n  
a  
ti  
o  
n  
p  
o  
li  
c  
y  
:  
tr  
i  
a  
l  
r  
e  
s  
u  
lt  
s

1 D # Authorship eligibility guidelines and any intended use of N/A  
2  
3 is 3 professional writers  
4 s 1  
5 e b  
6 m  
7 i  
8 n  
9 a  
10 ti  
11 o  
12 n  
13 p  
14 o  
15 li  
16 c  
17 y  
18 :  
19 a  
20 u  
21 t  
22 h  
23 o  
24 r  
25 s  
26 h  
27 i  
28 p  
29  
30  
31  
32  
33  
34  
35  
36  
37  
38  
39  
40  
41  
42  
43  
44  
45  
46  
47  
48  
49  
50  
51  
52  
53  
54  
55  
56  
57  
58  
59  
60



1 D # Plans, if any, for granting public access to the full protocol, N/A  
2 is 3 participant-level dataset, and statistical code  
3 s 1  
4 e c  
5 m  
6 i  
7 n  
8 a  
9 ti  
10 o  
11 n  
12 p  
13 o  
14 li  
15 c  
16 y  
17 :  
18 r  
19 e  
20 p  
21 r  
22 o  
23 d  
24 u  
25 c  
26 i  
27 b  
28 l  
29 e  
30 r  
31 e  
32 s  
33 e  
34 a  
35 r  
36 c  
37 h

|    |    |   |                                                               |     |
|----|----|---|---------------------------------------------------------------|-----|
| 1  | I  | # | Model consent form and other related documentation given      | N/A |
| 2  |    |   |                                                               |     |
| 3  | n  | 3 | to participants and authorised surrogates                     |     |
| 4  | f  | 2 |                                                               |     |
| 5  |    |   |                                                               |     |
| 6  | o  |   |                                                               |     |
| 7  | r  |   |                                                               |     |
| 8  |    |   |                                                               |     |
| 9  | m  |   |                                                               |     |
| 10 |    |   |                                                               |     |
| 11 | e  |   |                                                               |     |
| 12 | d  |   |                                                               |     |
| 13 |    |   |                                                               |     |
| 14 | c  |   |                                                               |     |
| 15 | o  |   |                                                               |     |
| 16 | n  |   |                                                               |     |
| 17 |    |   |                                                               |     |
| 18 | s  |   |                                                               |     |
| 19 |    |   |                                                               |     |
| 20 | e  |   |                                                               |     |
| 21 | n  |   |                                                               |     |
| 22 | t  |   |                                                               |     |
| 23 |    |   |                                                               |     |
| 24 | m  |   |                                                               |     |
| 25 |    |   |                                                               |     |
| 26 | a  |   |                                                               |     |
| 27 | t  |   |                                                               |     |
| 28 |    |   |                                                               |     |
| 29 | e  |   |                                                               |     |
| 30 | ri |   |                                                               |     |
| 31 |    |   |                                                               |     |
| 32 | a  |   |                                                               |     |
| 33 | ls |   |                                                               |     |
| 34 |    |   |                                                               |     |
| 35 |    |   |                                                               |     |
| 36 | B  | # | Plans for collection, laboratory evaluation, and storage of   | N/A |
| 37 | i  | 3 | biological specimens for genetic or molecular analysis in     |     |
| 38 |    |   |                                                               |     |
| 39 | o  | 3 | the current trial and for future use in ancillary studies, if |     |
| 40 |    |   |                                                               |     |
| 41 | l  |   | applicable                                                    |     |
| 42 |    |   |                                                               |     |
| 43 | o  |   |                                                               |     |
| 44 |    |   |                                                               |     |
| 45 | g  |   |                                                               |     |
| 46 |    |   |                                                               |     |
| 47 | i  |   |                                                               |     |
| 48 |    |   |                                                               |     |
| 49 | c  |   |                                                               |     |
| 50 |    |   |                                                               |     |
| 51 | a  |   |                                                               |     |
| 52 |    |   |                                                               |     |
| 53 | l  |   |                                                               |     |
| 54 |    |   |                                                               |     |
| 55 | s  |   |                                                               |     |
| 56 |    |   |                                                               |     |
| 57 | p  |   |                                                               |     |
| 58 |    |   |                                                               |     |
| 59 | e  |   |                                                               |     |
| 60 |    |   |                                                               |     |
|    | c  |   |                                                               |     |
|    |    |   |                                                               |     |
|    | i  |   |                                                               |     |

m  
e  
n  
s

## Author notes

1. 15, 16, 17, 18

The SPIRIT checklist is distributed under the terms of the Creative Commons Attribution License CC-BY-ND 3.0. This checklist was completed on 12. December 2018 using <http://www.goodreports.org/>, a tool made by the [EQUATOR Network](#) in collaboration with [Penelope.ai](#)

# BMJ Open

**The Surveillance After Extremity Tumour surgery (SAFETY)  
Trial: Protocol for a pilot study to determine the feasibility  
of a multi-centre randomized controlled trial**

|                                 |                                                                                                                 |
|---------------------------------|-----------------------------------------------------------------------------------------------------------------|
| Journal:                        | <i>BMJ Open</i>                                                                                                 |
| Manuscript ID                   | bmjopen-2019-029054.R3                                                                                          |
| Article Type:                   | Protocol                                                                                                        |
| Date Submitted by the Author:   | 22-Aug-2019                                                                                                     |
| Complete List of Authors:       | Ghert, Michelle; McMaster University, Department of Surgery; Hamilton Health Sciences, Juravinski Cancer Centre |
| <b>Primary Subject Heading</b>: | Oncology                                                                                                        |
| Secondary Subject Heading:      | Surgery                                                                                                         |
| Keywords:                       | surveillance, soft tissue sarcoma, study protocol, randomised controlled trial, pilot study                     |
|                                 |                                                                                                                 |

SCHOLARONE™  
Manuscripts

1  
2  
3 *Original article*  
4

5 **The Surveillance AftEr Extremity Tumour surgerY (SAFETY) Trial: Protocol for a pilot**  
6  
7 **study to determine the feasibility of a multi-centre randomized controlled trial**  
8

9  
10 The SAFETY Investigators  
11  
12

13  
14  
15 **Protocol version 1; December 3, 2018**  
16  
17  
18  
19  
20  
21  
22  
23  
24  
25

26 **Correspondence and reprints**  
27

28 Michelle Ghert, MD, FRCSC  
29

30 Professor of Surgery  
31

32 Division of Orthopaedic Surgery  
33

34 Department of Surgery  
35

36 McMaster University  
37

38 711 Concession Street  
39

40 Hamilton, ON  
41

42 Canada  
43

44 Tel: 905-387-9495 ext 64089  
45

46 Fax: 905-381-7071  
47

48 Email: [mghert@hhsc.ca](mailto:mghert@hhsc.ca)  
49

50  
51  
52  
53 **Contributor list with affiliations**  
54  
55  
56  
57  
58  
59  
60

1  
2  
3 Michelle Ghert, MD, FRCSC (Steering Committee Chair)  
4 Department of Surgery, McMaster University (Hamilton, Ontario, Canada)  
5  
6

7 Mohit Bhandari, MD, PhD, FRCSC  
8 Department of Surgery & Department of Health Research Methods, Evidence and Impact,  
9 McMaster University (Hamilton, Ontario, Canada)  
10  
11

12 Anthony Bozzo, MD  
13 Department of Surgery, McMaster University (Hamilton, Ontario, Canada)  
14  
15

16 P.D. Sander Dijkstra, MD, PhD  
17 Department of Orthopaedics, Leiden University Medical Center (Leiden, the Netherlands)  
18  
19

20 Anthony Griffin, MSc  
21 Musculoskeletal Oncology Unit, Mount Sinai Hospital (Toronto, Ontario, Canada)  
22  
23

24 Robert Grimer, MB BS, DSc, FRCS, FRCS Ed(Orth)  
25 Department of Surgery, University of Birmingham (Birmingham, United Kingdom)  
26  
27

28 James Hayden, MD, PhD, FACS  
29 Department of Orthopaedics & Rehabilitation, Oregon Health & Science University (Portland,  
30 Oregon, USA)  
31  
32

33 Arlene Manherz  
34 (Community)  
35  
36

37 Karim Masrouha, MD  
38 Department of Surgery, McMaster University (Hamilton, Ontario, Canada)  
39  
40

41 Paula McKay, BSc  
42 Department of Surgery, McMaster University (Hamilton, Ontario, Canada)  
43  
44

45 Benjamin Miller, MD, MS, FACS  
46 Department of Orthopaedics & Rehabilitation, University of Iowa (Iowa City, Iowa, USA)  
47  
48

49 Naveen Parasu, MD, MRCP (UK), MRCR (UK), FRCPC  
50 Department of Radiology, McMaster University (Hamilton, Ontario, Canada)  
51  
52

53 Ajay Puri, MS (Ortho)  
54 Department of Surgical Oncology, Tata Memorial Centre (Mumbai, India)  
55  
56

57 R. Lor Randall, MD, FACS  
58  
59  
60

1  
2  
3 Department of Orthopaedic Surgery, University of California, Davis (Sacramento, California,  
4 USA)  
5

6  
7 Patricia Schneider, BSc  
8 Department of Surgery, McMaster University (Hamilton, Ontario, Canada)  
9

10  
11 Sheila Sprague, PhD  
12 Department of Surgery, McMaster University (Hamilton, Ontario, Canada)  
13

14  
15 Nina Szpakowski, MSc, DVM  
16 (Community)  
17

18  
19 Lehana Thabane, PhD  
20 Department of Health Research Methods, Evidence and Impact, McMaster University  
21 (Hamilton, Ontario, Canada)  
22

23  
24 Robert Turcotte, MD, FRCSC  
25 Department of Surgery, McGill University (Montreal, Quebec, Canada)  
26

27  
28 Roberto Vélez, MD, PhD  
29 Department of Orthopaedic Surgery, Hospital Vall d'Hebron (Barcelona, Catalunya, Spain)  
30

31  
32 David Wilson, MD, MSc  
33 Department of Surgery, McMaster University (Hamilton, Ontario, Canada)  
34

35  
36 Kevin Zbuk, MD, FRCPC  
37 Department of Oncology, McMaster University (Hamilton, Ontario, Canada)  
38

39  
40 Gordon Guyatt, MD, FRCPC  
41 Department of Medicine & Department of Health Research Methods, Evidence and Impact,  
42 McMaster University (Hamilton, Ontario, Canada)  
43  
44  
45  
46  
47  
48  
49  
50  
51  
52  
53  
54  
55  
56  
57  
58  
59  
60

## Abstract

**Introduction** Following the treatment of patients with soft tissue sarcomas (STS) that are not metastatic at presentation, the high risk for local and systemic disease recurrence necessitates post-treatment surveillance. Systemic recurrence is most often detected in the lungs. The most appropriate surveillance frequency and modality remain unknown and, as such, clinical practice is highly varied. We plan to assess the feasibility of conducting a multi-centre randomised controlled trial (RCT) that will evaluate the effect on overall five-year survival of two different surveillance frequencies and imaging modalities in patients with STS who undergo surgical excision with curative intent.

**Methods and analysis** The SAFETY trial will be a multi-centre 2x2 factorial randomized controlled trial. Patients with non-metastatic primary Grade II or III STS treated with excision will be allocated to one of four treatment arms: (1) chest radiograph (CXR) every three months for two years; (2) CXR every six months for two years; (3) chest computed tomography (CT) every three months for two years; or (4) chest CT every six months for two years. The primary outcome of the pilot study is the feasibility of a definitive RCT based on a combination of feasibility endpoints. Secondary outcomes for the pilot study include the primary outcome of the definitive trial (overall survival), patient-reported outcomes on anxiety, satisfaction and quality of life, local recurrence-free survival, metastasis-free survival, treatment-related complications, and net healthcare costs related to surveillance.

**Ethics and dissemination** This trial received provisional ethics approval from the McMaster / Hamilton Health Sciences Research Ethics Board on August 7, 2019 (Project number 7562). Final ethics approval will be obtained prior to commencing patient recruitment. Once feasibility has



1  
2  
3 been established and the definitive protocol is finalized, the study will transition to the definitive  
4  
5 study.  
6  
7  
8  
9

## 10 **Article summary**

### 11 12 13 14 **Strengths and limitations of this study**

- 15  
16  
17 • The SAFETY trial will be an international multi-centre 2x2 factorial randomized controlled  
18  
19 trial
- 20  
21 • The trial will answer a high priority question for sarcoma surgeons
- 22  
23 • The SAFETY trial will build on the international collaboration and experience of the PARITY  
24  
25 trial
- 26  
27 • The feasibility pilot study is essential before undertaking this large multi-centre trial
- 28  
29 • The success of the pilot study is dependent on the ability of clinical sites to recruit patients,  
30  
31 comply with the protocol, and complete high quality follow-up data  
32  
33  
34  
35  
36  
37  
38

39 **Keywords:** surveillance; soft tissue sarcoma; study protocol; randomized controlled trial; pilot  
40  
41 study  
42  
43  
44  
45  
46  
47  
48  
49  
50  
51  
52  
53  
54  
55  
56  
57  
58  
59  
60

## Background

### *Magnitude of the problem*

Sarcomas are malignancies of connective tissue that most commonly occur in the extremities. Sarcomas can arise within bone (bone sarcoma) or soft-tissue (soft-tissue sarcoma [STS]). Chemotherapy is not curative for the vast majority of patients with STS(1); therefore, surgery is the standard treatment for STS, with radiation considered important for local disease control.

Following treatment for a STS that is not metastatic at presentation, the risk for local and systemic disease recurrence necessitates careful post-operative surveillance. Between 40% and 50% of all sarcoma patients will develop a local or distant recurrence; however, the risk of recurrence is greatest in the first few years, with 68% occurring by two years and 90% by five years(2-4). Metastasis to the lung is the most frequent single location of disease recurrence in sarcoma patients, occurring in the majority of patients with metastases(4-7). Therefore, routine follow-up after completing sarcoma treatment is standard practice in the first five years after surgery. These visits typically include a clinical history, physical examination, and imaging of the lungs (chest radiograph [CXR], or computed tomography [CT] scan of the lungs).

Surveillance strategies for long-term follow-up of sarcoma patients have not been well researched and current guidelines are based on expert opinion, not on high quality evidence(8, 9). As such, current clinical practice is highly varied, with survey data of musculoskeletal oncologists showing that the number of clinic visits ranges from two to 12, the number of CXRs obtained ranges from zero to 13, and the number of CT scans ranges from one to eight in the first year of surveillance(10-12). The current National Comprehensive Cancer Network guidelines suggest that stage II or III tumors should be followed with chest imaging (CT or CXR) every two to six months

1  
2  
3 for the first two to three years and then annually thereafter, while stage I tumors could be followed  
4  
5 less frequently during the first two to three years (13).  
6  
7  
8  
9

### 10 *Best evidence for surveillance strategies*

11  
12 Post-treatment soft-tissue sarcoma surveillance is an integral element of patient care. Although  
13  
14 earlier detection of metastatic disease may improve long-term survival, no study has yet provided  
15  
16 definitive evidence to support this assumption. In order to assess the available evidence, we  
17  
18 completed a systematic review of the available randomized controlled trial (RCT) evidence for  
19  
20 surveillance in sarcoma management(14). A single study (published separately with early and  
21  
22 longer-term follow-up) was identified(15, 16). The authors of this single-centre study found that  
23  
24 three-year overall and disease-free survival was not worse in sarcoma patients who had less  
25  
26 intensive surveillance (CXR) than those with more intensive surveillance (CT scans)(15). Due to  
27  
28 the sample size, this trial could not conclusively demonstrate non-inferiority in overall or disease-  
29  
30 free survival for a six-monthly interval of follow-up visits against three-monthly interval (both  
31  
32 were 64% and 69%, respectively)(15).  
33  
34  
35  
36  
37

38 A follow-up study on the same patient cohort with five-year survival outcomes confirmed  
39  
40 that more frequent follow-up did not improve survival and that, although CT scans detected  
41  
42 pulmonary metastasis earlier, they did not lead to better survival compared with CXRs(16).  
43  
44 However, this was a single-centre study with relatively small numbers and, therefore, confidence  
45  
46 in the results and generalizability of the data to other centres is limited. In addition, a relatively  
47  
48 small proportion of screened patients (42%) that were eligible for the trial were included due to  
49  
50 the exclusion of patients unlikely to follow-up, thus possibly introducing selection bias(15).  
51  
52  
53 Furthermore, low-grade sarcomas were eligible and included in this study, even though they have  
54  
55  
56  
57  
58  
59  
60

1  
2  
3 little metastatic potential and tumour-related mortality; their inclusion may have diminished the  
4 magnitude of the effects of the interventions(15). Finally, the majority of the included patients  
5 were bone sarcoma patients, thereby limiting the interpretation to STS patients(15).  
6  
7  
8  
9

### 10 11 12 *Risks and benefits of intensive surveillance* 13

14 Regular, intensive surveillance is more likely to identify recurrent disease earlier than would less  
15 intensive surveillance. This type of surveillance may provide reassurance to patients and clinicians;  
16 however, the adverse effects of intensive surveillance practices are also noteworthy. The costs that  
17 healthcare systems incur as a result of sarcoma surveillance are substantial and could be in excess  
18 of USD \$20,000 for high-grade sarcomas(17). Furthermore, intensive surveillance can threaten the  
19 financial security of patients, due in part to the direct (including travel, accommodation, personal  
20 care, and homemaking) and indirect costs (including lost wages for patients and their caregivers)  
21 incurred as a result of follow-up appointments(18). As a result, patients' health and quality of life  
22 can be dramatically impacted(18-20).  
23  
24  
25  
26  
27  
28  
29  
30  
31  
32  
33  
34

35 Secondary investigations and earlier knowledge of disease recurrence can also induce  
36 anxiety and impact the psychosocial wellbeing for those whose mortality risk cannot be  
37 significantly reduced by further medical interventions(21). Overcrowded clinics and long wait  
38 times may constitute other important factors that affect patients' psychosocial wellbeing(22).  
39 Finally, the use of CT has raised concerns over unnecessary radiation exposure compared to  
40 radiographs, although lower dose CT scans may mitigate some of these concerns(23).  
41  
42  
43  
44  
45  
46  
47  
48  
49  
50

### 51 *Surveillance research as a priority in orthopedic oncology* 52 53 54 55 56 57 58 59 60

1  
2  
3 We recently published a modified Delphi study in which we aimed to identify a clinically relevant  
4 consensus-based research agenda in the sarcoma field(24). From this Delphi process that included  
5  
6 80 orthopaedic oncologists and patient representation (with participation from 18 countries), we  
7  
8 identified critical research priorities in the field of orthopaedic oncology and determined the top  
9  
10 four feasible and important research questions that will directly inform patient care and enhance  
11  
12 clinical practice. This study identified the evaluation of post-operative surveillance strategies as  
13  
14 the highest-ranking research priority in the sarcoma field(24).  
15  
16  
17  
18  
19  
20

### 21 **Patient and public involvement**

22  
23 To ensure that we maintain a patient-centered approach to the design and development of this  
24  
25 study, we required the opportunity for open dialogue between the multidisciplinary and  
26  
27 international SAFETY study team, along with patient / caregiver representatives and other key  
28  
29 stakeholders. To facilitate their interaction and collaboration, we held an in-person Protocol  
30  
31 Development Meeting in Toronto, ON, Canada in May 2018. At this meeting, we made critical  
32  
33 decisions with respect to the study protocol, including: A) study design; B) primary and secondary  
34  
35 outcomes; C) patient eligibility; D) follow-up timeframe; E) methods to protect against bias; F)  
36  
37 randomization stratification; and G) further patient engagement. We also had the opportunity to  
38  
39 discuss several issues that may compromise the study's success and strategize ways to manage  
40  
41 these challenges, such as: I) acceptable surveillance schedules that account for differences in  
42  
43 international standards of clinical practice; II) possible ethical concerns; III) patient compliance;  
44  
45 IV) local implementation and procedural variation; V) competing studies; and VI) funding  
46  
47 opportunities.  
48  
49  
50  
51  
52  
53  
54  
55  
56  
57  
58  
59  
60

1  
2  
3 We are also conducting a patient survey to assess international patient willingness to  
4 participate in a study that randomizes patients to a post-operative surveillance regimen in the  
5 management of a primary extremity sarcoma. Since there is no available validated tool to assess  
6 patient opinions and preferences, we developed a unique patient questionnaire for the purposes  
7 of this study. All new patients who present to a participating sarcoma clinic are screened for study  
8 participation. The preliminary survey questionnaire responses suggest that most sarcoma  
9 patients believe that they have a good understanding of clinical research. Furthermore, over half  
10 of respondents feel comfortable with being randomized to receive a treatment. Ultimately,  
11 almost 80% of respondents have indicated that they would agree to participate in the SAFETY  
12 trial if eligible.  
13  
14  
15  
16  
17  
18  
19  
20  
21  
22  
23  
24  
25  
26  
27  
28  
29

### 30 **Study design**

31  
32 We plan to assess the feasibility of conducting the pragmatic, international, multi-centre, 2x2  
33 factorial Surveillance AftEr Extremity Tumour surgery (SAFETY) RCT that answers the  
34 following questions: In extremity STS patients who undergo surgical resection with curative intent,  
35 (1) what is the impact of surveillance frequency (every three vs. every six months) on overall  
36 survival at five years, and (2) what is the impact of surveillance imaging modality (CXR vs. CT  
37 scan) on overall survival at five years? To assess feasibility, we will conduct a pilot study. Study  
38 participants will be randomized to one of four possible treatment arms (see Study Interventions  
39 below). Randomization will occur at the end of active treatment (surgery  $\pm$  systemic treatment  $\pm$   
40 local radiation). Following the two-year intervention phase, study participants will continue to be  
41 assessed at regular intervals for an additional three years. As such, all pilot study patients will be  
42 transitioned into the definitive study and be included in it. Details of the flow of each study arm  
43  
44  
45  
46  
47  
48  
49  
50  
51  
52  
53  
54  
55  
56  
57  
58  
59  
60

1  
2  
3 are outlined in Figure 1. We anticipate the duration of the pilot study to be three years in order to  
4 collect intervention phase data on all participants. The primary outcome of the pilot study is the  
5 feasibility of a definitive RCT based on a combination of feasibility endpoints.  
6  
7  
8  
9

10 The 2x2 factorial study design is ideal and the most efficient method to study two treatment  
11 interventions in a single RCT, particularly when there is no interaction between the two  
12 interventions. This is unlike a scenario in which the two interventions are medications that may  
13 have a synergistic or negative effect when combined. A Bayesian design would be useful to avoid  
14 the question of whether or not an interaction exists, however for the purposes of the present trial it  
15 is clear that no interaction exists between the frequency and intensity of surveillance. As Freidlin  
16 and Korn discuss in their commentary, the 2x2 factorial design is an efficient design to evaluate  
17 two interventions in a cancer clinical trial when there are no interactions between treatments(25).  
18  
19  
20  
21  
22  
23  
24  
25  
26  
27  
28  
29

## 30 **Objectives**

### 31 *Pilot study primary research objectives*

32 The primary objective of the pilot study will be to determine whether it is feasible to conduct a  
33 large multi-centre RCT that will evaluate the impact of surveillance strategies on patient survival  
34 following extremity STS surgery. To do so, we will assess our ability to:  
35  
36  
37  
38

- 39  
40  
41 A) Recruit patients across multiple participating clinical sites;  
42  
43 B) Ensure compliance with the study protocol, including the application of eligibility criteria,  
44 timing of intervention phase and post-intervention phase visits and imaging modality;  
45  
46  
47 C) Maintain completeness of follow-up data;  
48  
49 D) Maintain completeness of cost analysis data; and  
50  
51 E) Maintain data quality.  
52  
53  
54  
55  
56  
57  
58  
59  
60

### *Pilot study secondary research objectives*

The secondary objectives of the pilot study will include assessing the impact of either surveillance frequency (every three vs. every six months) or imaging modality (CXR vs. CT scan) on:

- A) Overall survival;
- B) Patient anxiety, satisfaction and quality of life;
- C) Local recurrence-free survival and metastasis-free survival;
- D) Treatment-related complications; and
- E) Net direct healthcare costs and net costs of treatment and treatment-related complications once metastases are detected.

## **Hypothesis**

### *Pilot study*

We hypothesize that the SAFETY trial will be feasible due to: A) its pragmatic design; B) our established international collaborative research network; C) our qualified, multi-disciplinary study team; D) our existing trial infrastructure; and E) the priority of the study question.

### *Definitive study*

There are two hypotheses:

- 1- More frequent post-operative surveillance (compared to less frequent post-operative surveillance) in the first two years following the surgical excision of a STS will improve survival over five years;
- 2 - The use of post-operative CT scans (compared to CXR) in the first two years following the surgical excision of a STS will improve survival over five years.



## Study setting

This study will be coordinated by the Methods Centre within the Centre for Evidence-Based Orthopaedics (CEO) at McMaster University (Hamilton, ON, Canada). For the pilot study, we expect that patients will be enrolled from ten clinical sites across four continents. Clinical sites will be carefully screened prior to participation in the study. The clinical site inclusion criteria are: I) adequate research personnel and infrastructure to manage the study; II) sufficiently high extremity STS volume to complete enrollment within the study timeline (defined as greater than or equal to ( $\geq$ ) 20 patients per year); III) commitment from all or most orthopaedic oncologists to participate in the trial; and IV) access to the two imaging modalities. The exclusion criteria are: I) a lack of interest in the trial; II) anticipated challenges with protocol compliance; III) conflicting studies, in the judgment of the Principal Investigator, that would inhibit patient participation; and IV) financial or contract constraints.

## Patient eligibility criteria

### *Inclusion criteria*

Patients who meet all of the following criteria will be included:

- 1) Age of 18 years or older;
- 2) Diagnosed with a primary extremity grade II or III STS;
- 3) Undergone surgical resection of the tumour with curative intent and grossly negative margins (R0 or R1 resection margins);
- 4) Completed neoadjuvant or adjuvant radiation and / or chemotherapy, if applicable;

- 1
- 2
- 3 5) The tumour size is greater than or equal to ( $\geq$ ) five centimeters according to the pathology
- 4 report or pre-treatment MRI if neoadjuvant radiation and / or chemotherapy are given; and
- 5
- 6
- 7
- 8 6) Provision of informed consent.
- 9

### 10

### 11

### 12 *Exclusion criteria*

### 13

14 Patients who meet any of the following criteria will be excluded:

- 15
- 16
- 17 1) Metastatic disease at initial presentation based on thoracic imaging (a second CT scan may be
- 18 required to confirm that indeterminate nodules are false positives before the patient can be
- 19 enrolled provided that the second CT scan shows no evidence of metastatic disease);
- 20
- 21
- 22
- 23
- 24 2) Undergone surgical excision of a local recurrence;
- 25
- 26 3) Diagnosis of one of the special sub-types: myxoid / round cell liposarcoma or extra-skeletal
- 27 Ewing's sarcoma (These sarcomas have different metastatic patterns, which necessitate
- 28 different surveillance protocols);
- 29
- 30
- 31
- 32
- 33 4) Previous diagnosis of a genetic syndrome with an elevated risk of malignancy, such as Li-
- 34 Fraumeni Syndrome (such individuals appear to be at an elevated risk for radiation-induced
- 35 cancers, so the use of CT scans should be limited);
- 36
- 37
- 38
- 39
- 40 5) Previous diagnosis with a co-morbid condition that has a life expectancy of less than one year;
- 41
- 42
- 43 6) The site-specific surveillance protocol for the patient's disease is not compatible with the study
- 44 protocol (i.e., regular planned whole-body imaging with positron emission tomography [PET]
- 45 scans);
- 46
- 47
- 48
- 49 7) Diagnosed with another malignancy within the past five years;
- 50
- 51 8) Likely problems, in the judgment of the investigator, with maintaining follow-up; and
- 52
- 53
- 54 9) Currently enrolled in a study that does not permit co-enrollment;
- 55
- 56
- 57
- 58
- 59
- 60

1  
2  
3 10) The patient has already been enrolled in the SAFETY trial.  
4  
5  
6  
7

### 8 **Recruitment and screening**

9

10 Each participating clinical site will have a locally responsible investigator who will oversee the  
11 local administration of the trial, screen STS patients for eligibility, and develop a site-specific  
12 patient enrollment plan. A Screening Form will be completed for all STS patients aged 18 years  
13 or older, irrespective of whether they are eligible to participate in the study or not. Patients will  
14 become eligible, will be screened and consented during the first clinic visit at which all treatment  
15 is complete, the surgical wound has healed, and the plan for post-treatment surveillance is  
16 discussed with the patient. The process of obtaining and documenting informed consent will be  
17 completed in accordance with local Good Clinical Practice recommendations. Consent procedures  
18 will comply with the appropriate ethics committee and the Health Insurance Portability and  
19 Accountability Act (where applicable).  
20  
21  
22  
23  
24  
25  
26  
27  
28  
29  
30  
31  
32  
33  
34

### 35 **Randomisation and allocation of patients to study groups**

36

37 A centralised and automated internet-based randomisation system using random variable block  
38 sizes will assign participants to the study groups. Study personnel at each participating site will  
39 complete this task. Randomisation will occur only after eligibility is confirmed and consent to  
40 participate has been obtained. Participants will be stratified based on clinical site and peri-  
41 operative chemotherapy.  
42  
43  
44  
45  
46  
47  
48  
49  
50

### 51 **Study interventions**

52

53 Participants will be randomised to one of four treatment groups:  
54  
55  
56  
57  
58  
59  
60

- 1
- 2
- 3 1) CXR every three months for two years;
- 4
- 5 2) CXR every six months for two years;
- 6
- 7 3) Chest CT every three months for two years; or
- 8
- 9 4) Chest CT every six months for two years.
- 10
- 11

12 Following completion of the intervention phase, participants will continue to be followed  
13 in the study for an additional three years. During this three-year post-intervention phase,  
14 participants will be followed at least every six months as per National Comprehensive Cancer  
15 Network (NCCN) guidelines(13). If possible, thoracic imaging will continue at each scheduled  
16 post-intervention phase visit according to the participants' original allocations.  
17  
18  
19  
20  
21  
22  
23  
24  
25

## 26 **Relapse**

27  
28 Local imaging and clinical assessment of the primary tumour site will be carried out as per the  
29 standard protocol at each participating clinical site. Further diagnostic tests will be performed in  
30 the presence of clinical symptoms or radiologic findings suggestive of disease relapse. Recurrence  
31 will be radiologically or histologically confirmed and classified as local or systemic (metastasis)  
32 recurrence. The first modality suggesting disease relapse in participants with confirmed local or  
33 systemic recurrence will be recorded as responsible for its detection.  
34  
35  
36  
37  
38  
39  
40  
41  
42  
43  
44

## 45 **Outcome measures**

### 46 *Pilot study primary outcome*

47  
48 To evaluate feasibility, we will assess the number of patients screened and recruited at each  
49 participating clinical site, participant retention, and maintenance of data quality. In addition, we  
50 will evaluate the utilization of an internet-based centralized randomisation system focusing on the  
51  
52  
53  
54  
55  
56  
57  
58  
59  
60

1  
2  
3 accuracy of data entry, appropriate stratification of participants and the minimization of  
4  
5 randomisation errors. Finally, we will evaluate investigator and participant compliance with the  
6  
7 study protocol, including the application of eligibility criteria, compliance with the surveillance  
8  
9 imaging and frequency regimens, frequency of crossover and timing of post-intervention phase  
10  
11 visits. As discussed by Moore *et al.*, the pilot study will investigate the process of the proposed  
12  
13 definitive trial rather than its outcomes (26). The *a priori* criteria for the success of the pilot study  
14  
15 are listed below:  
16  
17

18  
19 A) *Recruitment Measure*: We will consider our recruitment strategy feasible if we are able to enroll  
20  
21 the pilot sample of 195 patients (approximately 20 patients from each clinical site participating in  
22  
23 the pilot study) within two years. See sample size determination below. As such, we will aim to  
24  
25 recruit 100 patients during the first year. If we are unable to achieve at least 90% of this goal (90  
26  
27 patients) then we will plan to increase the number of participating sites as a study rescue measure.  
28  
29

30  
31 B) *Protocol Adherence Measure*: During the pilot study of the PARITY trial, we were able to  
32  
33 maintain an overall protocol adherence rate in excess of 90%(27). Recent reports prepared for the  
34  
35 PARITY Data and Safety Monitoring Board (DSMB) indicate a similar protocol adherence rate.  
36  
37 However, given the greater complexity and longer duration of the SAFETY trial interventions, we  
38  
39 will consider our protocol adherence strategies feasible if there is adherence of 85% or greater to  
40  
41 the visit windows and imaging modality prescribed by the protocol.  
42  
43

44  
45 C) *Participant Retention Measure*: While 20% loss-to-follow-up has traditionally been considered  
46  
47 acceptable in clinical research, evidence from other orthopaedic trials suggests that bias begins to  
48  
49 affect study results at even lower rates of loss-to-follow-up(28). Therefore, we will consider our  
50  
51 participant retention strategies feasible if no more than 15% of participants are lost-to-follow-up.  
52  
53  
54  
55  
56  
57  
58  
59  
60

1  
2  
3 D) *Maintenance of Data Quality Measure*: We obtained a data completeness rate of approximately  
4 90% in the PARITY trial pilot study (27). Therefore, we will consider our data quality strategies  
5 feasible if we are able to maintain 95% or greater completeness of participant follow-up data for  
6 the definitive primary outcome. We will also consider our data quality strategies feasible if we are  
7 able to maintain 85% or greater completeness of participant follow-up data for the secondary  
8 outcomes.  
9

10  
11  
12  
13  
14  
15  
16  
17  
18  
19 *Pilot study secondary outcomes*

20  
21 Death from any cause will be recorded during the pilot study. Data on secondary outcomes for the  
22 definitive trial, which are listed below, will also be collected. These include:  
23

24  
25 A) *Patient-reported outcome measures*: The validated Patient-Reported Outcomes Measurement  
26 Information System (PROMIS)<sup>®</sup> Cancer-Anxiety questionnaire, PROMIS<sup>®</sup> Satisfaction with  
27 Social Roles and Activities questionnaire, and the EuroQol-5 Dimension (EQ-5D) will be used to  
28 assess patient anxiety, satisfaction and quality of life, respectively. These questionnaires will be  
29 administered at the baseline visit, as well as the 6-month, 12-month, 18-month and 24-month  
30 intervention phase, as well as 36-month, 48-month and 60-month post-intervention phase visits.  
31

32  
33 B) *Local recurrence-free survival (LRFS) outcome measure*: LRFS will be defined as the length  
34 of time from randomization that the participant survives with no detection of recurrent disease at  
35 the initial tumor site or operative field.  
36

37  
38 C) *Metastasis-free survival (MFS) outcome measure*: MFS will be defined as the length of time  
39 from randomization that the participant survives with no detection of systemic disease recurrence  
40 at any anatomic location.  
41  
42  
43  
44  
45  
46

1  
2  
3 D) *Treatment-related complications outcome measures*: Treatment-related complications will  
4 include both chemotherapy-related complications, such as febrile neutropenia, fungal infections or  
5  
6 include both chemotherapy-related complications, such as febrile neutropenia, fungal infections or  
7  
8 sepsis, and thoracotomy-related complications, such as pneumothorax, or surgical site infections.  
9

10 E) *Net healthcare costs outcome measures*: We will perform an incremental cost analysis of net  
11  
12 costs of surveillance and costs incurred from metastasis treatment and metastasis treatment related  
13  
14 complications. Unit costs for all resources used by trial participants will be obtained from regional  
15  
16 statistics and from centers participating in the trial. These unit costs will be combined with the  
17  
18 resource volumes to obtain a net cost per participant over their time in the trial.  
19  
20  
21  
22  
23

## 24 **Protecting against sources of bias**

### 25 26 *Adjudication of outcomes*

27  
28 An independent Central Adjudication Committee (CAC) will review all situations where eligibility  
29  
30 is in doubt, as well as all reported instances of disease relapse, treatment-related complications,  
31  
32 and death to determine whether a study event has occurred. The SAFETY CAC will be comprised  
33  
34 of two orthopaedic oncologists, one medical oncologist, and one radiologist. All participating  
35  
36 clinical sites will submit digital imaging and relevant hospital records to the Methods Centre via a  
37  
38 web-based platform for events that require adjudication.  
39  
40  
41  
42  
43

### 44 45 *Blinding*

46  
47 The local clinical team, site study personnel and participants cannot be blinded to the treatment  
48  
49 allocation. The CAC will be blinded to surveillance frequency. The data analysts will, however,  
50  
51 remain blinded during the trial's analysis.  
52  
53  
54  
55  
56  
57  
58  
59  
60

### *Maximization of follow-up*

We anticipate only minimal losses to follow-up in our musculoskeletal oncology population.

Nonetheless, the following procedures will be implemented to minimize losses:

- Individuals likely to present problems with compliance to the study protocol or maintaining follow-up will be excluded;
- At the time of randomization, participants will be asked to provide their contact information, as well as the contact information of their family physician and three alternate contacts;
- Participants who refuse to return for a study assessment will be asked if they are willing to provide follow-up data (to determine survival and to complete study questionnaires) via telephone;
- If a participant cannot be reached, their status regarding the primary study outcome will be assessed by reviewing their medical records;
- Study personnel will remind participants of upcoming clinic visits;
- To assuage possible concerns related to less frequent follow-up, participants will be encouraged to schedule an ad hoc visit anytime they are concerned, even if it breaks the surveillance protocol to which they were assigned;
- Participants will be provided with access to educational content, such as a video that demonstrates how to self-examine for a local recurrence of their STS; and
- Parking and travel vouchers will be provided to participants, where possible, to alleviate the costs associated with the study.

### *Minimization of crossovers of surveillance interventions*



1  
2  
3 Crossovers are unlikely for either surveillance intervention as investigators will be requesting the  
4 imaging modality during surveillance visits. Any deviation with regards to frequency or imaging  
5 modality will be documented. In the event of disease recurrence or progression, the following  
6  
7  
8  
9  
10 standardized management protocols will be adopted:

- 11  
12 ▪ Local Recurrence: the participant will have a lung CT scan to confirm no progression of their  
13 systemic disease before continuing with the study protocol.
- 14  
15 ▪ Metastases: the participant will no longer be followed as per the study protocol, but per the  
16 appropriate follow-up for the interventions required for the treatment of metastases; however,  
17 the participant will continue to be followed in the trial.  
18  
19  
20  
21  
22

23  
24 For both events, the specific imaging modality used to detect either the local recurrence or the  
25 metastases will be documented.  
26

27  
28 Patients that have incidental or off-protocol imaging will not crossover, however this will  
29 be documented as a protocol deviation. In the case of a CXR that warrants further investigation  
30 with a CT scan, this will be documented. If the patient is found to have disease recurrence, we will  
31 document how the disease recurrence was (A) first identified; and (B) confirmed. If after a CT  
32 scan the patient is found to not have disease recurrence, the patient will resume surveillance as per  
33 the arm to which they were randomised.  
34  
35  
36  
37  
38  
39  
40  
41  
42  
43  
44

## 45 **Sample size determination**

### 46 *Pilot study sample size*

47  
48 The confidence interval approach was used to calculate the required sample size for the pilot  
49 study(29). We determined *a priori* that the definitive trial would only be feasible if our protocol  
50  
51  
52  
53  
54  
55  
56  
57  
58  
59  
60

1  
2  
3 adherence rate was at least 85%. Using a 95% confidence level and a 5% margin of error, we  
4  
5 calculated a required sample size of 195 patients.  
6  
7  
8  
9

### 10 *Definitive study sample size*

11  
12 Our best estimate of the control group overall five-year survival for both the surveillance frequency  
13  
14 and imaging modality is 55%(16). Given that intensive surveillance will detect metastatic disease  
15  
16 at an earlier stage, we will use a superiority design to compare survival between more versus less  
17  
18 intensive surveillance. A 10% absolute increase in overall five-year survival associated with both  
19  
20 more frequent surveillance and the use of CT scans represents a clinically important difference, as  
21  
22 outlined by the American Society of Clinical Oncology's statement on clinically meaningful  
23  
24 outcomes in cancer trials(30). Therefore, the definitive trial will be powered to detect an absolute  
25  
26 difference of 10% in overall five-year survival.  
27  
28  
29

30  
31 With a desired power of 0.80, we calculated a sample size of 396 participants per study  
32  
33 arm. We will account for a 5% loss to follow-up and, therefore, the final sample size will be 830  
34  
35 participants. **Table 1** shows various sample sizes for pairwise comparisons of alternative  
36  
37 surveillance frequencies / imaging modalities given varying control event rates and absolute  
38  
39 increases in survival. Statistical Package for the Social Sciences (SPSS) (IBM Corporation)  
40  
41 software was used for sample size calculation.  
42  
43  
44

45 The definitive sample size calculation may be adjusted as we prepare for the transition from  
46  
47 the pilot to the definitive study as a result of data collected during the pilot study. One factor we  
48  
49 may consider will be the percent lost to follow-up by the end of the pilot study. Other factors such  
50  
51 as the estimated control group overall five-year survival, the clinically meaningful outcome, and  
52  
53 power cannot be amended. The rationale for transition of subject data from the pilot study to the  
54  
55  
56  
57  
58  
59  
60

definitive study has previously been discussed (31). It is acceptable to pool the data if the study methods are not adjusted following the pilot study, and the research tools are standardized.

**Table 1.** Sample Size Per Group for 80% power,  $\alpha=0.05$ . Event rate = death

|                                                 |     | Event Rate in More Intensive Surveillance Group |      |      |      |
|-------------------------------------------------|-----|-------------------------------------------------|------|------|------|
|                                                 |     | 25%                                             | 30%  | 35%  | 40%  |
| Event Rate in Less Intensive Surveillance Group | 35% | 696                                             | 2832 | -    | -    |
|                                                 | 40% | 332                                             | 752  | 3020 | -    |
|                                                 | 45% | 196                                             | 352  | 792  | 3148 |
|                                                 | 50% | 132                                             | 204  | 368  | 816  |
|                                                 | 55% | 96                                              | 136  | 212  | 372  |

### Analysis of feasibility outcomes

A full description of the measures, variables, and methods of analysis are shown in **Table 2**. We will record the total number of participants enrolled on a monthly basis. Each participating site will keep a Screening Log of included and excluded patients. We will also keep a record of participants who miss visits, and those who are withdrawn or lost to follow-up. These will be

reported using descriptive statistics – reported as counts (percent) for categorical variables and mean (standard deviation) for continuous variables with 95% confidence intervals. We will report the proportion of complete CRFs as descriptive data.

### Analysis of definitive study primary outcome

The analysis and reporting of the trial will follow the CONSORT criteria(32). The primary analysis will compare the treatment groups on the overall 5-year survival. Two independent comparisons between treatment groups will be made using Cox regression models with time to the definitive primary endpoint(33). Results will be expressed as effect (ORs for binary outcomes, HRs for time-dependent outcomes and mean difference for continuous outcomes), corresponding 2-sided 95% CIs and associated p-values.

**Table 2.** Summary of Feasibility Outcomes Analysis Plan

| Objective                                                                            | Outcome                       | Criteria for success of feasibility          | Method of analysis                                                                                                                                  |
|--------------------------------------------------------------------------------------|-------------------------------|----------------------------------------------|-----------------------------------------------------------------------------------------------------------------------------------------------------|
| To determine the feasibility of conducting the multi-centre SAFETY international RCT | Recruitment Measure           | Enrollment of pilot sample within two years  | Descriptive statistics – reported as counts (percent) for categorical variables and means (standard deviation) for continuous variables with 95% CI |
|                                                                                      | Protocol Adherence Measure    | Protocol adherence of 85% or greater         |                                                                                                                                                     |
|                                                                                      | Participant Retention Measure | Loss-to-participant follow-up of 15% or less |                                                                                                                                                     |

|  |                                     |                                                                                                                                          |  |
|--|-------------------------------------|------------------------------------------------------------------------------------------------------------------------------------------|--|
|  | Maintenance of Data Quality Measure | Data completeness of 95% or greater for the definitive primary outcome<br>Data completeness of 85% or greater for the secondary outcomes |  |
|--|-------------------------------------|------------------------------------------------------------------------------------------------------------------------------------------|--|

### **Ethical considerations**

This study is to be conducted according to international standards of Good Clinical Practice, applicable government regulations, and institutional research policies and procedures. All study intervention phase (surveillance) arms fall within the spectrum of current standard practice, as do the standardized post-intervention phase follow-up visits. This trial has received provisional ethics approval from the McMaster / Hamilton Health Sciences Research Ethics Board on August 7, 2019 (Project number 7562). The study protocol will be submitted to a properly constituted independent ethics committee, in agreement with local legal prescriptions, for formal approval of the study

1  
2  
3 conduct at each participating clinical site. A copy of this approval will be provided to the Methods  
4  
5 Centre by each participating clinical site prior to the local commencement of the study.  
6  
7  
8  
9

## 10 **Study Timeline**

11  
12 We expect that the pilot study will take just over three years to complete. We estimate that  
13  
14 recruitment will take approximately one year to complete per site. The initiation of screening and  
15  
16 enrollment will likely be staggered across the participating clinical sites due to the variability in  
17  
18 the time required to obtain ethics approval and negotiate institutional contracts. Therefore the pilot  
19  
20 study recruitment timeline will be up to two years. We expect a further one year for all pilot  
21  
22 participants to complete the intervention phase of the trial. Although we will not have complete  
23  
24 post-intervention phase data for any pilot participants, we anticipate being able to determine  
25  
26 feasibility at the end of the intervention phase based on our feasibility objectives. We plan *a priori*  
27  
28 to transition directly from the pilot to the definitive study if feasibility is established.  
29  
30  
31  
32  
33  
34

## 35 **Data Safety Monitoring Board**

36  
37  
38  
39 As per the principles established by the *Data Monitoring Committees: Lessons, Ethics, Statistics*  
40  
41 (*DAMOCLES*) *Study Group* charter, a DSMB will oversee the safety of the trial participants and  
42  
43 the overall conduct of the trial. The Committee members will be independent of the trial, free of  
44  
45 conflicts with any of the investigative team, and will consist of two orthopaedic oncologists, a  
46  
47 medical oncologist, a radiologist, and a biostatistician. The DSMB will frequently review  
48  
49 enrollment and demographic summaries, listings of protocol deviations, and summaries and  
50  
51 listings of serious adverse events. They will advise the Principal Investigator and SAFETY study  
52  
53 team on any concerns related to participant safety and trial conduct and will make  
54  
55  
56  
57  
58  
59  
60

1  
2  
3  
4 recommendations for: A) study continuation as designed; B) study termination; C) study  
5  
6 continuation with major or minor modifications; or D) temporary study suspension of enrollment  
7  
8 until some uncertainty is resolved.  
9  
10

### 11 12 13 **Knowledge Dissemination**

14  
15  
16 The results of the study will be submitted for publication regardless of whether there are significant  
17  
18 findings, as well as posted on [ClinicalTrials.gov](http://ClinicalTrials.gov). The trial has been registered on [clinicaltrials.gov](http://clinicaltrials.gov).  
19  
20 The registration number is NCT03944798. In addition to scientific manuscripts and presentations,  
21  
22 we plan to prepare study reports and press releases for patients and other stakeholders that are  
23  
24 transparent, and that the language is understandable to the general public.  
25  
26  
27

### 28 29 **Potential impact of the study**

30  
31 The benefit of this pilot study would be to determine the feasibility of the SAFETY trial. This is  
32  
33 essential prior to undertaking a large multi-centre RCT. Experience gained during the pilot study  
34  
35 will provide insight into methods to increase enrollment, strategies to maintain protocol adherence  
36  
37 and the adjustment of recruitment expectations. In addition, the ultimate success of the pilot study  
38  
39 will support funding requests for the definitive study of the multi-centre SAFETY trial.  
40  
41  
42

43 Once the feasibility endpoints are reached, we will transition directly into and begin  
44  
45 recruiting for the definitive SAFETY trial. The ultimate goal of the SAFETY trial is to provide  
46  
47 high-quality evidence for surveillance strategies following the treatment of STS, which will allow  
48  
49 for the development of evidence-based clinical practice guidelines for sarcoma patients worldwide.  
50  
51  
52

### 53 54 **References**

1. Pervaiz N, Colterjohn N, Farrokhyar F, Tozer R, Figueredo A, Ghert M. A systematic meta-analysis of randomized controlled trials of adjuvant chemotherapy for localized resectable soft-tissue sarcoma. *Cancer*. 2008;113(3):573-81.
2. Whooley BP, Mooney MM, Gibbs JF, Kraybill WG. Effective follow-up strategies in soft tissue sarcoma. *Seminars in surgical oncology*. 1999;17(1):83-7.
3. Whooley BP, Gibbs JF, Mooney MM, McGrath BE, Kraybill WG. Primary extremity sarcoma: what is the appropriate follow-up? *Annals of surgical oncology*. 2000;7(1):9-14.
4. Kane JM, 3rd. Surveillance strategies for patients following surgical resection of soft tissue sarcomas. *Current opinion in oncology*. 2004;16(4):328-32.
5. Gadd MA, Casper ES, Woodruff JM, McCormack PM, Brennan MF. Development and treatment of pulmonary metastases in adult patients with extremity soft tissue sarcoma. *Annals of surgery*. 1993;218(6):705-12.
6. Huth JF, Eilber FR. Patterns of metastatic spread following resection of extremity soft-tissue sarcomas and strategies for treatment. *Seminars in surgical oncology*. 1988;4(1):20-6.
7. Songur N, Dinc M, Ozdilekcan C, Eke S, Ok U, Oz M. Analysis of lung metastases in patients with primary extremity sarcoma. *Sarcoma*. 2003;7(2):63-7.
8. Group ESESNW. Bone sarcomas: ESMO Clinical Practice Guidelines for diagnosis, treatment and follow-up. *Annals of oncology : official journal of the European Society for Medical Oncology*. 2014;25 Suppl 3:iii113-23.
9. Group ESESNW. Soft tissue and visceral sarcomas: ESMO Clinical Practice Guidelines for diagnosis, treatment and follow-up. *Annals of oncology : official journal of the European Society for Medical Oncology*. 2014;25 Suppl 3:iii102-12.
10. Gerrand CH, Billingham LJ, Woll PJ, Grimer RJ. Follow up after Primary Treatment of Soft Tissue Sarcoma: A Survey of Current Practice in the United Kingdom. *Sarcoma*. 2007;2007:34128.
11. Greenberg DD, Crawford B. Surveillance Strategies for Sarcoma: Results of a Survey of Members of the Musculoskeletal Tumor Society. *Sarcoma*. 2016;2016:8289509.
12. Ries Z, Gibbs CP, Jr., Scarborough MT, Miller BJ. Pulmonary Surveillance Strategies Following Sarcoma Excision Vary Among Orthopedic Oncologists: A Survey of the Musculoskeletal Tumor Society. *The Iowa orthopaedic journal*. 2016;36:109-16.
13. von Mehren M, Randall RL, Benjamin RS, Boles S, Bui MM, Ganjoo KN, et al. Soft Tissue Sarcoma, Version 2.2018, NCCN Clinical Practice Guidelines in Oncology. *Journal of the National Comprehensive Cancer Network : JNCCN*. 2018;16(5):536-63.
14. Bozzo A GM, Baldawi H, Simchovich G. Optimal surveillance strategies following curative surgery for extremity sarcoma: A systematic review of randomized control trials. *Open Science Framework*. 2018(May).
15. Puri A, Gulia A, Hawaldar R, Ranganathan P, Badwe RA. Does intensity of surveillance affect survival after surgery for sarcomas? Results of a randomized noninferiority trial. *Clinical orthopaedics and related research*. 2014;472(5):1568-75.



16. Puri A, Ranganathan P, Gulia A, Crasto S, Hawaldar R, Badwe RA. Does a less intensive surveillance protocol affect the survival of patients after treatment of a sarcoma of the limb? updated results of the randomized TOSS study. *The bone & joint journal*. 2018;100-B(2):262-8.
17. Goel A, Christy ME, Virgo KS, Kraybill WG, Johnson FE. Costs of follow-up after potentially curative treatment for extremity soft-tissue sarcoma. *International journal of oncology*. 2004;25(2):429-35.
18. Longo CJ, Deber R, Fitch M, Williams AP, D'Souza D. An examination of cancer patients' monthly 'out-of-pocket' costs in Ontario, Canada. *European journal of cancer care*. 2007;16(6):500-7.
19. Hopkins RB, Goeree R, Longo CJ. Estimating the national wage loss from cancer in Canada. *Current oncology*. 2010;17(2):40-9.
20. Nipp RD, Zullig LL, Samsa G, Peppercorn JM, Schrag D, Taylor DH, Jr., et al. Identifying cancer patients who alter care or lifestyle due to treatment-related financial distress. *Psycho-oncology*. 2016;25(6):719-25.
21. Thompson CA, Charlson ME, Schenkein E, Wells MT, Furman RR, Elstrom R, et al. Surveillance CT scans are a source of anxiety and fear of recurrence in long-term lymphoma survivors. *Annals of oncology : official journal of the European Society for Medical Oncology*. 2010;21(11):2262-6.
22. Thomas S, Glynne-Jones R, Chait I. Is it worth the wait? A survey of patients' satisfaction with an oncology outpatient clinic. *European journal of cancer care*. 1997;6(1):50-8.
23. Brenner DJ, Hall EJ. Computed tomography--an increasing source of radiation exposure. *The New England journal of medicine*. 2007;357(22):2277-84.
24. Schneider PJ, Evaniew N, McKay P, Ghert M. Moving Forward Through Consensus: A Modified Delphi Approach to Determine the Top Research Priorities in Orthopaedic Oncology. *Clinical orthopaedics and related research*. 2017;475(12):3044-55.
25. Freidlin B, Korn EL. Two-by-Two Factorial Cancer Treatment Trials: Is Sufficient Attention Being Paid to Possible Interactions? *Journal of the National Cancer Institute*. 2017;109(9).
26. Moore CG, Carter RE, Nietert PJ, Stewart PW. Recommendations for planning pilot studies in clinical and translational research. *Clinical and translational science*. 2011;4(5):332-7.
27. Investigators P. Prophylactic antibiotic regimens in tumour surgery (PARITY): a pilot multicentre randomised controlled trial. *Bone & joint research*. 2015;4(9):154-62.
28. Zelle BA, Bhandari M, Sanchez AI, Probst C, Pape HC. Loss of follow-up in orthopaedic trauma: is 80% follow-up still acceptable? *Journal of orthopaedic trauma*. 2013;27(3):177-81.
29. Thabane L, Ma J, Chu R, Cheng J, Ismaila A, Rios LP, et al. A tutorial on pilot studies: the what, why and how. *BMC medical research methodology*. 2010;10:1.
30. Ellis LM, Bernstein DS, Voest EE, Berlin JD, Sargent D, Cortazar P, et al. American Society of Clinical Oncology perspective: Raising the bar for clinical trials by defining clinically meaningful outcomes. *Journal of clinical oncology : official journal of the American Society of Clinical Oncology*. 2014;32(12):1277-80.
31. Leon AC, Davis LL, Kraemer HC. The role and interpretation of pilot studies in clinical research. *Journal of psychiatric research*. 2011;45(5):626-9.
32. Moher D, Schulz KF, Altman DG. The CONSORT statement: revised recommendations for improving the quality of reports of parallel-group randomised trials. *Lancet*. 2001;357(9263):1191-4.

1  
2  
3 33. Montgomery AA, Peters TJ, Little P. Design, analysis and presentation of factorial  
4 randomised controlled trials. BMC medical research methodology. 2003;3:26.  
5  
6  
7  
8  
9  
10  
11  
12  
13  
14  
15  
16  
17  
18  
19  
20  
21  
22  
23  
24  
25  
26  
27  
28

### 29 **Figure legend**

30  
31  
32 Figure 1. Study flow diagram  
33  
34  
35

### 36 **Data statement**

37  
38 All data from this work will be maintained in security and confidentiality at the Methods Centre  
39 at McMaster University. Access to additional unpublished data will be reviewed on a case-by-  
40 case basis and will accord with the guidelines of our local institutional research ethics board.  
41  
42  
43  
44  
45  
46  
47

### 48 **Authors' contributions**

- 49  
50  
51  
52  
53  
54  
55  
56  
57  
58  
59  
60
- Substantial contributions to the conception or design of the work; or the acquisition, analysis, or interpretation of data for the work: Michelle Ghert; Mohit Bhandari; Anthony Bozzo; P.D. Sander Dijkstra; Anthony Griffin; Robert Grimer; James Hayden; Arlene Manherz; Karim Masrouha; Paula McKay; Benjamin Miller; Naveen Parasu; Ajay

- 1  
2  
3 Puri; R. Lor Randall; Patricia Schneider; Sheila Sprague; Nina Szpakowski; Lehana  
4 Thabane; Robert Turcotte; Roberto Vélez; David Wilson; Kevin Zbuk; Gordon Guyatt  
5  
6 • Drafting the work: Michelle Ghert, Patricia Schneider, and Karim Masrouha  
7  
8 • Revising it critically for important intellectual content: Michelle Ghert; Mohit Bhandari;  
9 Anthony Bozzo; P.D. Sander Dijkstra; Anthony Griffin; Robert Grimer; James Hayden;  
10 Arlene Manherz; Karim Masrouha; Paula McKay; Benjamin Miller; Naveen Parasu; Ajay  
11 Puri; R. Lor Randall; Patricia Schneider; Sheila Sprague; Nina Szpakowski; Lehana  
12 Thabane; Robert Turcotte; Roberto Vélez; David Wilson; Kevin Zbuk; Gordon Guyatt  
13  
14 • Final approval of the version to be published: Michelle Ghert; Mohit Bhandari; Anthony  
15 Bozzo; P.D. Sander Dijkstra; Anthony Griffin; Robert Grimer; James Hayden; Arlene  
16 Manherz; Karim Masrouha; Paula McKay; Benjamin Miller; Naveen Parasu; Ajay Puri;  
17 R. Lor Randall; Patricia Schneider; Sheila Sprague; Nina Szpakowski; Lehana Thabane;  
18 Robert Turcotte; Roberto Vélez; David Wilson; Kevin Zbuk; Gordon Guyatt  
19  
20 • Agreement to be accountable for all aspects of the work in ensuring that questions related  
21 to the accuracy or integrity of any part of the work are appropriately investigated and  
22 resolved: Michelle Ghert; Mohit Bhandari; Anthony Bozzo; P.D. Sander Dijkstra;  
23 Anthony Griffin; Robert Grimer; James Hayden; Arlene Manherz; Karim Masrouha;  
24 Paula McKay; Benjamin Miller; Naveen Parasu; Ajay Puri; R. Lor Randall; Patricia  
25 Schneider; Sheila Sprague; Nina Szpakowski; Lehana Thabane; Robert Turcotte; Roberto  
26 Vélez; David Wilson; Kevin Zbuk; Gordon Guyatt  
27  
28  
29

### 30 **Acknowledgement**

31  
32 We would like to thank our patient advisers, Nina Szpakowski and Arlene Manherz, for their  
33  
34 contributions.  
35  
36  
37  
38

### 39 **Funding**

40  
41 This research is supported by funding through the Hamilton Academic Health Science  
42  
43 Organization (HAHSO) and the Canadian Cancer Society Research Institute (CCSRI) Innovation  
44  
45 Grants.  
46  
47  
48  
49  
50

### 51 **Competing interests statement**

52  
53 Dr. Bhandari, Dr. Ghert, Dr. Randall, and Dr. Hayden report personal fees from consultancy  
54  
55 and/or royalties outside the submitted work.  
56  
57  
58  
59  
60

1  
2  
3  
4  
5 **Word count**  
6

7  
8 5,223  
9  
10  
11  
12  
13  
14  
15  
16  
17  
18  
19  
20  
21  
22  
23  
24  
25  
26  
27  
28  
29  
30  
31  
32  
33  
34  
35  
36  
37  
38  
39  
40  
41  
42  
43  
44  
45  
46  
47  
48  
49  
50  
51  
52  
53  
54  
55  
56  
57  
58  
59  
60

For peer review only

1  
2  
3  
4  
5  
6  
7  
8  
9  
10  
11  
12  
13  
14  
15  
16  
17  
18  
19  
20  
21  
22  
23  
24  
25  
26  
27  
28  
29  
30  
31  
32  
33  
34  
35  
36  
37  
38  
39  
40  
41  
42  
43  
44  
45  
46  
47  
48  
49  
50  
51  
52  
53  
54  
55  
56  
57  
58  
59  
60

Figure 1.

M = month; CXR = chest X-ray; CT = computed tomography

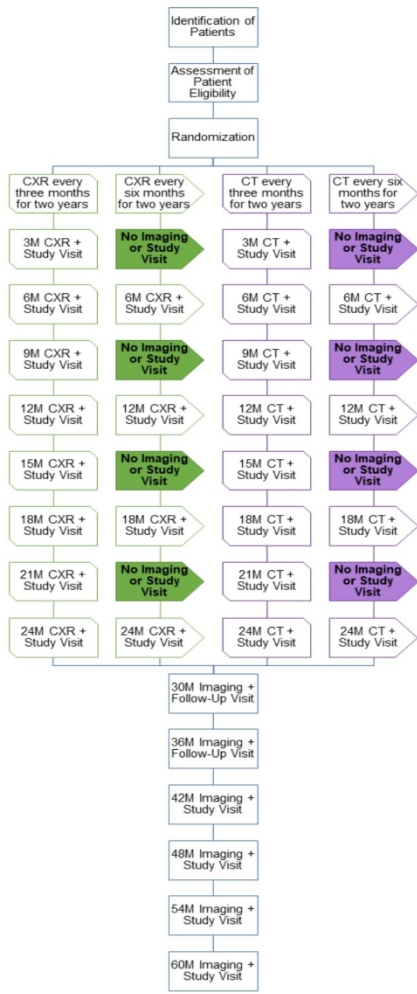

Study flow diagram

146x146mm (300 x 300 DPI)

# Reporting checklist for protocol of a clinical trial.

Based on the SPIRIT guidelines.

## Instructions to authors

Complete this checklist by entering the page numbers from your manuscript where readers will find each of the items listed below.

Your article may not currently address all the items on the checklist. Please modify your text to include the missing information. If you are certain that an item does not apply, please write "n/a" and provide a short explanation.

Upload your completed checklist as an extra file when you submit to a journal.

In your methods section, say that you used the SPIRIT reporting guidelines, and cite them as:

Chan A-W, Tetzlaff JM, Altman DG, Laupacis A, Gøtzsche PC, Krleža-Jerić K, Hróbjartsson A, Mann H, Dickersin K, Berlin J, Doré C, Parulekar W, Summerskill W, Groves T, Schulz K, Sox H, Rockhold FW, Rennie D, Moher D. SPIRIT 2013 Statement: Defining standard protocol items for clinical trials. *Ann Intern Med.* 2013;158(3):200-207

Page

Number

Reporting Item

|      |                                                             |   |
|------|-------------------------------------------------------------|---|
| T #  | Descriptive title identifying the study design, population, | 1 |
| it 1 | interventions, and, if applicable, trial acronym            |   |
| l    |                                                             |   |
| e    |                                                             |   |

1 T # Trial identifier and registry name. If not yet registered, N/A  
 2  
 3 ri 2 name of intended registry  
 4 a a  
 5 l  
 6 r  
 7 e  
 8 g  
 9 is  
 10 tr  
 11 a  
 12 ti  
 13 o  
 14 n

22 T # All items from the World Health Organization Trial N/A  
 23 ri 2 Registration Data Set  
 24 a b  
 25 l  
 26 r  
 27 e  
 28 g  
 29 is  
 30 tr  
 31 a  
 32 ti  
 33 o  
 34 n  
 35 :  
 36 d  
 37 a  
 38 t  
 39 a  
 40 s  
 41 e  
 42 t

1 P # Date and version identifier 1  
2  
3 r 3  
4  
5 o  
6 t  
7 o  
8 c  
9  
10 o  
11 l  
12 v  
13 e  
14 r  
15 si  
16 o  
17 n  
18  
19  
20  
21  
22

23 F # Sources and types of financial, material, and other support HAHSO  
24 u 4  
25  
26 n  
27 d  
28 i  
29 n  
30 g  
31  
32  
33  
34  
35  
36  
37  
38  
39  
40  
41  
42  
43  
44  
45  
46  
47  
48  
49  
50  
51  
52  
53  
54  
55  
56  
57  
58  
59  
60



1 R # Names, affiliations, and roles of protocol contributors 2,3,28  
2  
3 o 5  
4 l a  
5  
6 e  
7 s  
8 a  
9 n  
10 d  
11 r  
12 e  
13 s  
14 p  
15 o  
16 n  
17 si  
18 b  
19 il  
20 it  
21 i  
22 e  
23 s:  
24 c  
25 o  
26 n  
27 tr  
28 i  
29 b  
30 u  
31 t  
32 o  
33 r  
34 s  
35 h  
36 i  
37 p  
38  
39  
40  
41  
42  
43  
44  
45  
46  
47  
48  
49  
50  
51  
52  
53  
54  
55  
56  
57  
58  
59  
60

|    |     |                                                    |     |
|----|-----|----------------------------------------------------|-----|
| 1  | R # | Name and contact information for the trial sponsor | N/A |
| 2  |     |                                                    |     |
| 3  | o   | 5                                                  |     |
| 4  | l   | b                                                  |     |
| 5  |     |                                                    |     |
| 6  | e   |                                                    |     |
| 7  | s   |                                                    |     |
| 8  | a   |                                                    |     |
| 9  | n   |                                                    |     |
| 10 | d   |                                                    |     |
| 11 | r   |                                                    |     |
| 12 | e   |                                                    |     |
| 13 | s   |                                                    |     |
| 14 | p   |                                                    |     |
| 15 | o   |                                                    |     |
| 16 | n   |                                                    |     |
| 17 | si  |                                                    |     |
| 18 | b   |                                                    |     |
| 19 | il  |                                                    |     |
| 20 | it  |                                                    |     |
| 21 | i   |                                                    |     |
| 22 | e   |                                                    |     |
| 23 | s:  |                                                    |     |
| 24 | s   |                                                    |     |
| 25 | p   |                                                    |     |
| 26 | o   |                                                    |     |
| 27 | n   |                                                    |     |
| 28 | s   |                                                    |     |
| 29 | o   |                                                    |     |
| 30 | r   |                                                    |     |
| 31 | c   |                                                    |     |
| 32 | o   |                                                    |     |
| 33 | n   |                                                    |     |
| 34 | t   |                                                    |     |
| 35 | a   |                                                    |     |
| 36 | c   |                                                    |     |
| 37 | t   |                                                    |     |
| 38 | i   |                                                    |     |
| 39 | n   |                                                    |     |
| 40 | f   |                                                    |     |
| 41 |     |                                                    |     |
| 42 |     |                                                    |     |
| 43 |     |                                                    |     |
| 44 |     |                                                    |     |
| 45 |     |                                                    |     |
| 46 |     |                                                    |     |
| 47 |     |                                                    |     |
| 48 |     |                                                    |     |
| 49 |     |                                                    |     |
| 50 |     |                                                    |     |
| 51 |     |                                                    |     |
| 52 |     |                                                    |     |
| 53 |     |                                                    |     |
| 54 |     |                                                    |     |
| 55 |     |                                                    |     |
| 56 |     |                                                    |     |
| 57 |     |                                                    |     |
| 58 |     |                                                    |     |
| 59 |     |                                                    |     |
| 60 |     |                                                    |     |

1 o  
2 r  
3 m  
4 a  
5 ti  
6 o  
7 n  
8  
9  
10  
11  
12  
13  
14  
15  
16  
17  
18  
19  
20  
21  
22  
23  
24  
25  
26  
27  
28  
29  
30  
31  
32  
33  
34  
35  
36  
37  
38  
39  
40  
41  
42  
43  
44  
45  
46  
47  
48  
49  
50  
51  
52  
53  
54  
55  
56  
57  
58  
59  
60

1 R # Role of study sponsor and funders, if any, in study design; N/A  
2  
3 o 5 collection, management, analysis, and interpretation of  
4 l c data; writing of the report; and the decision to submit the  
5 e report for publication, including whether they will have  
6 s ultimate authority over any of these activities  
7  
8 a  
9  
10 n  
11 d  
12 r  
13 e  
14 s  
15 p  
16 o  
17 n  
18 si  
19 b  
20 il  
21 it  
22 i  
23 e  
24 s:  
25 s  
26 p  
27 o  
28 n  
29 s  
30 o  
31 r  
32 a  
33 n  
34 d  
35 f  
36 u  
37 n  
38 d  
39 e  
40 r  
41  
42  
43  
44  
45  
46  
47  
48  
49  
50  
51  
52  
53  
54  
55  
56  
57  
58  
59  
60

1 R # Composition, roles, and responsibilities of the coordinating 18, 24, 25  
2  
3 o 5 centre, steering committee, endpoint adjudication  
4 l d committee, data management team, and other individuals or  
5 e groups overseeing the trial, if applicable (see Item 21a for  
6 s data monitoring committee)  
7  
8 a  
9  
10 n  
11  
12 d  
13  
14 r  
15 e  
16 s  
17  
18 p  
19 o  
20 n  
21  
22 si  
23 b  
24 il  
25 it  
26 i  
27 e  
28 s:  
29 c  
30 o  
31 m  
32 m  
33 it  
34 t  
35 e  
36 e  
37 s

1 B # Description of research question and justification for 6, 7, 8  
2  
3 a 6 undertaking the trial, including summary of relevant studies  
4 c a (published and unpublished) examining benefits and harms  
5 k for each intervention  
6  
7 g  
8  
9 r  
10 o  
11 u  
12 n  
13 d  
14 a  
15 n  
16 d  
17 r  
18 a  
19 ti  
20 o  
21 n  
22 a  
23 l  
24 e  
25  
26  
27  
28  
29  
30  
31  
32  
33  
34  
35  
36  
37  
38  
39  
40  
41  
42  
43  
44  
45  
46  
47  
48  
49  
50  
51  
52  
53  
54  
55  
56  
57  
58  
59  
60

1 B # Explanation for choice of comparators  
2  
3 a 6  
4 c b  
5  
6 k  
7  
8 g  
9 r  
10 o  
11 u  
12 n  
13 d  
14 a  
15 n  
16 d  
17 r  
18 a  
19 ti  
20 o  
21 n  
22 a  
23 l  
24 e  
25 :  
26 c  
27 h  
28 o  
29 i  
30 c  
31 e  
32 o  
33 f  
34 c  
35 o  
36 m  
37 p  
38 a  
39 r  
40 a  
41 t

6

1 O  
2 r  
3  
4 s  
5  
6  
7  
8  
9  
10  
11  
12  
13  
14  
15  
16  
17  
18  
19  
20  
21  
22  
23  
24  
25  
26  
27  
28  
29  
30  
31  
32  
33  
34  
35  
36  
37  
38  
39  
40  
41  
42  
43  
44  
45  
46  
47  
48  
49  
50  
51  
52  
53  
54  
55  
56  
57  
58  
59  
60



|    |     |                                                                   |           |
|----|-----|-------------------------------------------------------------------|-----------|
| 1  | O # | Specific objectives or hypotheses                                 | 9, 10, 11 |
| 2  |     |                                                                   |           |
| 3  | b   | 7                                                                 |           |
| 4  | j   |                                                                   |           |
| 5  | e   |                                                                   |           |
| 6  | c   |                                                                   |           |
| 7  | ti  |                                                                   |           |
| 8  | v   |                                                                   |           |
| 9  | e   |                                                                   |           |
| 10 | s   |                                                                   |           |
| 11 |     |                                                                   |           |
| 12 |     |                                                                   |           |
| 13 |     |                                                                   |           |
| 14 |     |                                                                   |           |
| 15 |     |                                                                   |           |
| 16 | T # | Description of trial design including type of trial (eg,          | 9         |
| 17 |     |                                                                   |           |
| 18 | ri  | 8 parallel group, crossover, factorial, single group), allocation |           |
| 19 | a   | ratio, and framework (eg, superiority, equivalence, non-          |           |
| 20 |     | inferiority, exploratory)                                         |           |
| 21 | l   |                                                                   |           |
| 22 | d   |                                                                   |           |
| 23 | e   |                                                                   |           |
| 24 | si  |                                                                   |           |
| 25 | g   |                                                                   |           |
| 26 | n   |                                                                   |           |
| 27 |     |                                                                   |           |
| 28 |     |                                                                   |           |
| 29 |     |                                                                   |           |
| 30 |     |                                                                   |           |
| 31 | S # | Description of study settings (eg, community clinic,              | 11        |
| 32 |     |                                                                   |           |
| 33 | t   | 9 academic hospital) and list of countries where data will be     |           |
| 34 | u   | collected. Reference to where list of study sites can be          |           |
| 35 |     | obtained                                                          |           |
| 36 | d   |                                                                   |           |
| 37 | y   |                                                                   |           |
| 38 | s   |                                                                   |           |
| 39 | e   |                                                                   |           |
| 40 | tt  |                                                                   |           |
| 41 | i   |                                                                   |           |
| 42 | n   |                                                                   |           |
| 43 | g   |                                                                   |           |
| 44 |     |                                                                   |           |
| 45 |     |                                                                   |           |
| 46 |     |                                                                   |           |
| 47 |     |                                                                   |           |
| 48 |     |                                                                   |           |
| 49 |     |                                                                   |           |
| 50 |     |                                                                   |           |
| 51 |     |                                                                   |           |
| 52 |     |                                                                   |           |
| 53 |     |                                                                   |           |
| 54 |     |                                                                   |           |
| 55 |     |                                                                   |           |
| 56 |     |                                                                   |           |
| 57 |     |                                                                   |           |
| 58 |     |                                                                   |           |
| 59 |     |                                                                   |           |
| 60 |     |                                                                   |           |

1 E # Inclusion and exclusion criteria for participants. If 12  
2  
3 li 1 applicable, eligibility criteria for study centres and  
4 g 0 individuals who will perform the interventions (eg,  
5 i surgeons, psychotherapists)  
6  
7 b  
8  
9 il  
10  
11 it  
12  
13 y  
14  
15 c  
16  
17 ri  
18  
19 t  
20  
21 e  
22  
23 ri  
24  
25 a

24 I # Interventions for each group with sufficient detail to allow 14  
25 n 1 replication, including how and when they will be  
26 t 1 administered  
27  
28 e a  
29  
30 r  
31  
32 v  
33  
34 e  
35  
36 n  
37  
38 ti  
39  
40 o  
41  
42 n  
43  
44 s:  
45  
46 d  
47  
48 e  
49  
50 s  
51  
52 c  
53  
54 ri  
55  
56 p  
57  
58 ti  
59  
60 o  
n

1 I # Criteria for discontinuing or modifying allocated N/A  
2  
3 n 1 interventions for a given trial participant (eg, drug dose  
4 t 1 change in response to harms, participant request, or  
5 e b improving / worsening disease)  
6  
7 r  
8 v  
9 e  
10 n  
11 ti  
12 o  
13 n  
14 s:  
15 m  
16 o  
17 d  
18 if  
19 i  
20 c  
21 a  
22 ti  
23 o  
24 n  
25 s  
26  
27  
28  
29  
30  
31  
32  
33  
34  
35  
36  
37  
38  
39  
40  
41  
42  
43  
44  
45  
46  
47  
48  
49  
50  
51  
52  
53  
54  
55  
56  
57  
58  
59  
60

1 I # Strategies to improve adherence to intervention protocols, 19, 20  
2  
3 n 1 and any procedures for monitoring adherence (eg, drug  
4 t 1 tablet return; laboratory tests)  
5  
6 e c  
7  
8 r  
9  
10 v  
11 e  
12 n  
13 ti  
14 o  
15 n  
16 s:  
17 a  
18 d  
19 h  
20 e  
21 r  
22 a  
23 n  
24 c  
25 e  
26  
27  
28  
29  
30  
31  
32  
33  
34  
35  
36  
37  
38  
39  
40  
41  
42  
43  
44  
45  
46  
47  
48  
49  
50  
51  
52  
53  
54  
55  
56  
57  
58  
59  
60

|    |     |                                                              |            |
|----|-----|--------------------------------------------------------------|------------|
| 1  | I # | Relevant concomitant care and interventions that are         | 12, 13     |
| 2  |     |                                                              |            |
| 3  | n 1 | permitted or prohibited during the trial                     |            |
| 4  | t 1 |                                                              |            |
| 5  | e d |                                                              |            |
| 6  |     |                                                              |            |
| 7  | r   |                                                              |            |
| 8  |     |                                                              |            |
| 9  | v   |                                                              |            |
| 10 | e   |                                                              |            |
| 11 |     |                                                              |            |
| 12 | n   |                                                              |            |
| 13 | ti  |                                                              |            |
| 14 |     |                                                              |            |
| 15 | o   |                                                              |            |
| 16 |     |                                                              |            |
| 17 | n   |                                                              |            |
| 18 | s:  |                                                              |            |
| 19 | c   |                                                              |            |
| 20 |     |                                                              |            |
| 21 | o   |                                                              |            |
| 22 |     |                                                              |            |
| 23 | n   |                                                              |            |
| 24 | c   |                                                              |            |
| 25 |     |                                                              |            |
| 26 | o   |                                                              |            |
| 27 | m   |                                                              |            |
| 28 | it  |                                                              |            |
| 29 |     |                                                              |            |
| 30 | a   |                                                              |            |
| 31 |     |                                                              |            |
| 32 | n   |                                                              |            |
| 33 | t   |                                                              |            |
| 34 |     |                                                              |            |
| 35 | c   |                                                              |            |
| 36 |     |                                                              |            |
| 37 | a   |                                                              |            |
| 38 |     |                                                              |            |
| 39 | r   |                                                              |            |
| 40 |     |                                                              |            |
| 41 | e   |                                                              |            |
| 42 | O # | Primary, secondary, and other outcomes, including the        | See note 1 |
| 43 | u 1 | specific measurement variable (eg, systolic blood pressure), |            |
| 44 |     |                                                              |            |
| 45 | t 2 | analysis metric (eg, change from baseline, final value, time |            |
| 46 |     |                                                              |            |
| 47 | c   | to event), method of aggregation (eg, median, proportion),   |            |
| 48 |     |                                                              |            |
| 49 | o   | and time point for each outcome. Explanation of the clinical |            |
| 50 |     |                                                              |            |
| 51 | m   | relevance of chosen efficacy and harm outcomes is strongly   |            |
| 52 |     |                                                              |            |
| 53 | e   | recommended                                                  |            |
| 54 |     |                                                              |            |
| 55 | s   |                                                              |            |
| 56 |     |                                                              |            |
| 57 |     |                                                              |            |
| 58 |     |                                                              |            |
| 59 |     |                                                              |            |
| 60 |     |                                                              |            |

|    |    |   |                                                            |        |
|----|----|---|------------------------------------------------------------|--------|
| 1  | P  | # | Time schedule of enrolment, interventions (including any   | 24     |
| 2  |    |   |                                                            |        |
| 3  | a  | 1 | run-ins and washouts), assessments, and visits for         |        |
| 4  | rt | 3 | participants. A schematic diagram is highly recommended    |        |
| 5  |    |   | (see Figure)                                               |        |
| 6  | i  |   |                                                            |        |
| 7  | c  |   |                                                            |        |
| 8  |    |   |                                                            |        |
| 9  | i  |   |                                                            |        |
| 10 | P  |   |                                                            |        |
| 11 | a  |   |                                                            |        |
| 12 | n  |   |                                                            |        |
| 13 | t  |   |                                                            |        |
| 14 | ti |   |                                                            |        |
| 15 | m  |   |                                                            |        |
| 16 | e  |   |                                                            |        |
| 17 | li |   |                                                            |        |
| 18 | n  |   |                                                            |        |
| 19 | e  |   |                                                            |        |
| 20 |    |   |                                                            |        |
| 21 |    |   |                                                            |        |
| 22 |    |   |                                                            |        |
| 23 |    |   |                                                            |        |
| 24 |    |   |                                                            |        |
| 25 |    |   |                                                            |        |
| 26 | S  | # | Estimated number of participants needed to achieve study   | 20, 21 |
| 27 | a  | 1 | objectives and how it was determined, including clinical   |        |
| 28 | m  | 4 | and statistical assumptions supporting any sample size     |        |
| 29 | p  |   | calculations                                               |        |
| 30 | l  |   |                                                            |        |
| 31 | e  |   |                                                            |        |
| 32 | si |   |                                                            |        |
| 33 | z  |   |                                                            |        |
| 34 | e  |   |                                                            |        |
| 35 |    |   |                                                            |        |
| 36 |    |   |                                                            |        |
| 37 |    |   |                                                            |        |
| 38 |    |   |                                                            |        |
| 39 |    |   |                                                            |        |
| 40 |    |   |                                                            |        |
| 41 | R  | # | Strategies for achieving adequate participant enrolment to | 13, 14 |
| 42 | e  | 1 | reach target sample size                                   |        |
| 43 | c  | 5 |                                                            |        |
| 44 | r  |   |                                                            |        |
| 45 | u  |   |                                                            |        |
| 46 | it |   |                                                            |        |
| 47 | m  |   |                                                            |        |
| 48 | e  |   |                                                            |        |
| 49 | n  |   |                                                            |        |
| 50 | t  |   |                                                            |        |
| 51 |    |   |                                                            |        |
| 52 |    |   |                                                            |        |
| 53 |    |   |                                                            |        |
| 54 |    |   |                                                            |        |
| 55 |    |   |                                                            |        |
| 56 |    |   |                                                            |        |
| 57 |    |   |                                                            |        |
| 58 |    |   |                                                            |        |
| 59 |    |   |                                                            |        |
| 60 |    |   |                                                            |        |

1 A # Method of generating the allocation sequence (eg,  
2 ll 1 computer-generated random numbers), and list of any  
3 o 6 factors for stratification. To reduce predictability of a  
4 c a random sequence, details of any planned restriction (eg,  
5 a blocking) should be provided in a separate document that is  
6 ti unavailable to those who enrol participants or assign  
7 o interventions  
8  
9  
10  
11  
12  
13  
14  
15  
16  
17  
18  
19  
20  
21  
22  
23  
24  
25  
26  
27  
28  
29  
30  
31  
32  
33  
34  
35  
36  
37  
38  
39  
40  
41  
42  
43  
44  
45  
46  
47  
48  
49  
50  
51  
52  
53  
54  
55  
56  
57  
58  
59  
60

1 A # Mechanism of implementing the allocation sequence (eg,  
2 ll 1 central telephone; sequentially numbered, opaque, sealed  
3 o 6 envelopes), describing any steps to conceal the sequence  
4 c b until interventions are assigned

7 a  
8 ti  
9 o  
10 n  
11 c  
12 o  
13 n  
14 c  
15 e  
16 a  
17 l  
18 m  
19 e  
20 n  
21 t  
22 m  
23 e  
24 c  
25 h  
26 a  
27 n  
28 is  
29 m



|    |      |                                                             |    |
|----|------|-------------------------------------------------------------|----|
| 1  | A #  | Who will generate the allocation sequence, who will enrol   | 14 |
| 2  |      |                                                             |    |
| 3  | ll 1 | participants, and who will assign participants to           |    |
| 4  | o 6  | interventions                                               |    |
| 5  |      |                                                             |    |
| 6  | c c  |                                                             |    |
| 7  |      |                                                             |    |
| 8  | a    |                                                             |    |
| 9  | ti   |                                                             |    |
| 10 | o    |                                                             |    |
| 11 | n    |                                                             |    |
| 12 | n    |                                                             |    |
| 13 | .    |                                                             |    |
| 14 | .    |                                                             |    |
| 15 | i    |                                                             |    |
| 16 | m    |                                                             |    |
| 17 | p    |                                                             |    |
| 18 | l    |                                                             |    |
| 19 | e    |                                                             |    |
| 20 | m    |                                                             |    |
| 21 | e    |                                                             |    |
| 22 | n    |                                                             |    |
| 23 | t    |                                                             |    |
| 24 | a    |                                                             |    |
| 25 | ti   |                                                             |    |
| 26 | o    |                                                             |    |
| 27 | n    |                                                             |    |
| 28 |      |                                                             |    |
| 29 |      |                                                             |    |
| 30 |      |                                                             |    |
| 31 |      |                                                             |    |
| 32 |      |                                                             |    |
| 33 |      |                                                             |    |
| 34 |      |                                                             |    |
| 35 | B #  | Who will be blinded after assignment to interventions (eg,  | 19 |
| 36 | li 1 | trial participants, care providers, outcome assessors, data |    |
| 37 | n 7  | analysts), and how                                          |    |
| 38 |      |                                                             |    |
| 39 | d a  |                                                             |    |
| 40 |      |                                                             |    |
| 41 | i    |                                                             |    |
| 42 | n    |                                                             |    |
| 43 | g    |                                                             |    |
| 44 | (    |                                                             |    |
| 45 | m    |                                                             |    |
| 46 | a    |                                                             |    |
| 47 | s    |                                                             |    |
| 48 | k    |                                                             |    |
| 49 | i    |                                                             |    |
| 50 | n    |                                                             |    |
| 51 |      |                                                             |    |
| 52 |      |                                                             |    |
| 53 |      |                                                             |    |
| 54 |      |                                                             |    |
| 55 |      |                                                             |    |
| 56 |      |                                                             |    |
| 57 |      |                                                             |    |
| 58 |      |                                                             |    |
| 59 |      |                                                             |    |
| 60 |      |                                                             |    |

g

)

1  
2  
3  
4  
5  
6  
7  
8  
9  
10  
11  
12  
13  
14  
15  
16  
17  
18  
19  
20  
21  
22  
23  
24  
25  
26  
27  
28  
29  
30  
31  
32  
33  
34  
35  
36  
37  
38  
39  
40  
41  
42  
43  
44  
45  
46  
47  
48  
49  
50  
51  
52  
53  
54  
55  
56  
57  
58  
59  
60

N/A

1 B # If blinded, circumstances under which unblinding is  
2  
3 li 1 permissible, and procedure for revealing a participant's  
4 n 7 allocated intervention during the trial  
5  
6 d b  
7  
8 i  
9 n  
10 g  
11 (  
12 m  
13 a  
14 s  
15 k  
16 i  
17 n  
18 g  
19 ):  
20 e  
21 m  
22 e  
23 r  
24 g  
25 e  
26 n  
27 c  
28 y  
29 u  
30 n  
31 b  
32 li  
33 n  
34 d  
35 i  
36 n  
37 g

1 D # Plans for assessment and collection of outcome, baseline, N/A  
2  
3 a 1 and other trial data, including any related processes to  
4 t 8 promote data quality (eg, duplicate measurements, training  
5 a a of assessors) and a description of study instruments (eg,  
6 c questionnaires, laboratory tests) along with their reliability  
7 o and validity, if known. Reference to where data collection  
8 ll forms can be found, if not in the protocol  
9  
10 e  
11 c  
12 ti  
13 o  
14 n  
15 p  
16 l  
17 a  
18 n  
19  
20  
21  
22  
23  
24  
25  
26  
27  
28  
29  
30  
31  
32  
33  
34  
35  
36  
37  
38  
39  
40  
41  
42  
43  
44  
45  
46  
47  
48  
49  
50  
51  
52  
53  
54  
55  
56  
57  
58  
59  
60

1 D # Plans to promote participant retention and complete follow- 19  
2  
3 a 1 up, including list of any outcome data to be collected for  
4 t 8 participants who discontinue or deviate from intervention  
5  
6 a b protocols  
7  
8 c  
9 o  
10 ll  
11 e  
12 c  
13 ti  
14 o  
15 n  
16 p  
17 l  
18 a  
19 n  
20 :  
21 r  
22 e  
23 t  
24 e  
25 n  
26 ti  
27 o  
28 n

39  
40  
41  
42  
43  
44  
45  
46  
47  
48  
49  
50  
51  
52  
53  
54  
55  
56  
57  
58  
59  
60

1 D # Plans for data entry, coding, security, and storage, including 24, 25  
2  
3 a 1 any related processes to promote data quality (eg, double  
4 t 9 data entry; range checks for data values). Reference to  
5  
6 a where details of data management procedures can be found,  
7 m if not in the protocol  
8  
9 a  
10 n  
11 a  
12 g  
13 e  
14 m  
15 e  
16 n  
17 t

23 S # Statistical methods for analysing primary and secondary 22  
24 t 2 outcomes. Reference to where other details of the statistical  
25 a 0 analysis plan can be found, if not in the protocol  
26  
27 ti a  
28  
29 st  
30  
31 i  
32 c  
33 s:  
34 o  
35 u  
36 t  
37 c  
38 o  
39 m  
40 e  
41 s  
42  
43  
44  
45  
46  
47  
48  
49  
50  
51  
52  
53  
54  
55  
56  
57  
58  
59  
60

|    |    |   |                                                       |     |
|----|----|---|-------------------------------------------------------|-----|
| 1  | S  | # | Methods for any additional analyses (eg, subgroup and | N/A |
| 2  |    |   |                                                       |     |
| 3  | t  | 2 | adjusted analyses)                                    |     |
| 4  | a  | 0 |                                                       |     |
| 5  |    |   |                                                       |     |
| 6  | t  | i | b                                                     |     |
| 7  |    |   |                                                       |     |
| 8  | s  | t |                                                       |     |
| 9  |    |   |                                                       |     |
| 10 | i  |   |                                                       |     |
| 11 |    |   |                                                       |     |
| 12 | c  |   |                                                       |     |
| 13 |    |   |                                                       |     |
| 14 | s: |   |                                                       |     |
| 15 |    |   |                                                       |     |
| 16 | a  |   |                                                       |     |
| 17 |    |   |                                                       |     |
| 18 | d  |   |                                                       |     |
| 19 |    |   |                                                       |     |
| 20 | d  |   |                                                       |     |
| 21 |    |   |                                                       |     |
| 22 | i  |   |                                                       |     |
| 23 |    |   |                                                       |     |
| 24 | o  |   |                                                       |     |
| 25 |    |   |                                                       |     |
| 26 | n  |   |                                                       |     |
| 27 |    |   |                                                       |     |
| 28 | a  |   |                                                       |     |
| 29 |    |   |                                                       |     |
| 30 | l  |   |                                                       |     |
| 31 |    |   |                                                       |     |
| 32 | a  |   |                                                       |     |
| 33 |    |   |                                                       |     |
| 34 | n  |   |                                                       |     |
| 35 |    |   |                                                       |     |
| 36 | a  |   |                                                       |     |
| 37 |    |   |                                                       |     |
| 38 | l  |   |                                                       |     |
| 39 |    |   |                                                       |     |
| 40 | y  |   |                                                       |     |
| 41 |    |   |                                                       |     |
| 42 | s  |   |                                                       |     |
| 43 |    |   |                                                       |     |
| 44 | e  |   |                                                       |     |
| 45 |    |   |                                                       |     |
| 46 | s  |   |                                                       |     |
| 47 |    |   |                                                       |     |
| 48 |    |   |                                                       |     |
| 49 |    |   |                                                       |     |
| 50 |    |   |                                                       |     |
| 51 |    |   |                                                       |     |
| 52 |    |   |                                                       |     |
| 53 |    |   |                                                       |     |
| 54 |    |   |                                                       |     |
| 55 |    |   |                                                       |     |
| 56 |    |   |                                                       |     |
| 57 |    |   |                                                       |     |
| 58 |    |   |                                                       |     |
| 59 |    |   |                                                       |     |
| 60 |    |   |                                                       |     |

1 S # Definition of analysis population relating to protocol non- N/A  
2 t 2 adherence (eg, as randomised analysis), and any statistical  
3 a 0 methods to handle missing data (eg, multiple imputation)  
4 ti c  
5  
6 st  
7  
8 i  
9  
10 c  
11 s:  
12 a  
13 n  
14 a  
15 l  
16 y  
17 si  
18 s  
19 p  
20 o  
21 p  
22 u  
23 l  
24 a  
25 ti  
26 o  
27 n  
28 a  
29 n  
30 d  
31 m  
32 is  
33 si  
34 n  
35 g  
36 d  
37 a  
38 t  
39 a  
40  
41  
42  
43  
44  
45  
46  
47  
48  
49  
50  
51  
52  
53  
54  
55  
56  
57  
58  
59  
60



D # Composition of data monitoring committee (DMC);  
a 2 summary of its role and reporting structure; statement of  
t 1 whether it is independent from the sponsor and competing  
a a interests; and reference to where further details about its  
m charter can be found, if not in the protocol. Alternatively,  
o an explanation of why a DMC is not needed  
n  
it  
o  
ri  
n  
g  
:  
f  
o  
r  
m  
a  
l  
c  
o  
m  
m  
it  
t  
e  
e

|    |     |                                                              |        |
|----|-----|--------------------------------------------------------------|--------|
| 1  | D # | Description of any interim analyses and stopping             | N/A    |
| 2  |     |                                                              |        |
| 3  | a 2 | guidelines, including who will have access to these interim  |        |
| 4  | t 1 | results and make the final decision to terminate the trial   |        |
| 5  |     |                                                              |        |
| 6  | a b |                                                              |        |
| 7  | m   |                                                              |        |
| 8  |     |                                                              |        |
| 9  | o   |                                                              |        |
| 10 | n   |                                                              |        |
| 11 | it  |                                                              |        |
| 12 |     |                                                              |        |
| 13 | o   |                                                              |        |
| 14 | ri  |                                                              |        |
| 15 | n   |                                                              |        |
| 16 | g   |                                                              |        |
| 17 | :   |                                                              |        |
| 18 | i   |                                                              |        |
| 19 | n   |                                                              |        |
| 20 | t   |                                                              |        |
| 21 | e   |                                                              |        |
| 22 | ri  |                                                              |        |
| 23 | m   |                                                              |        |
| 24 | a   |                                                              |        |
| 25 | n   |                                                              |        |
| 26 | a   |                                                              |        |
| 27 | l   |                                                              |        |
| 28 | y   |                                                              |        |
| 29 | si  |                                                              |        |
| 30 | s   |                                                              |        |
| 31 |     |                                                              |        |
| 32 |     |                                                              |        |
| 33 |     |                                                              |        |
| 34 |     |                                                              |        |
| 35 |     |                                                              |        |
| 36 |     |                                                              |        |
| 37 |     |                                                              |        |
| 38 |     |                                                              |        |
| 39 |     |                                                              |        |
| 40 |     |                                                              |        |
| 41 | H # | Plans for collecting, assessing, reporting, and managing     | 24, 25 |
| 42 | a 2 | solicited and spontaneously reported adverse events and      |        |
| 43 | r 2 | other unintended effects of trial interventions or trial     |        |
| 44 | m   | conduct                                                      |        |
| 45 |     |                                                              |        |
| 46 | s   |                                                              |        |
| 47 |     |                                                              |        |
| 48 |     |                                                              |        |
| 49 |     |                                                              |        |
| 50 | A # | Frequency and procedures for auditing trial conduct, if any, | 24, 25 |
| 51 | u 2 | and whether the process will be independent from             |        |
| 52 | d 3 | investigators and the sponsor                                |        |
| 53 |     |                                                              |        |
| 54 | it  |                                                              |        |
| 55 | i   |                                                              |        |
| 56 |     |                                                              |        |
| 57 |     |                                                              |        |
| 58 |     |                                                              |        |
| 59 |     |                                                              |        |
| 60 |     |                                                              |        |

1 n  
2 g  
3  
4  
5  
6  
7  
8  
9  
10  
11 R #  
12 e 2  
13 s 4  
14  
15 e  
16 a  
17 r  
18 c  
19 h  
20 e  
21 t  
22 h  
23 i  
24 c  
25 s  
26 a  
27 p  
28 p  
29 r  
30 o  
31 v  
32 a  
33 l  
34  
35  
36  
37  
38  
39  
40  
41  
42  
43  
44  
45  
46  
47  
48  
49  
50  
51  
52  
53  
54  
55  
56  
57  
58  
59  
60

Plans for seeking research ethics committee / institutional review board (REC / IRB) approval 23, 24

1 P # Plans for communicating important protocol modifications N/A  
2  
3 r 2 (eg, changes to eligibility criteria, outcomes, analyses) to  
4 o 5 relevant parties (eg, investigators, REC / IRBs, trial  
5 t participants, trial registries, journals, regulators)  
6  
7 o  
8  
9 c  
10  
11 o  
12 l  
13 a  
14 m  
15 m  
16 e  
17 n  
18 d  
19 m  
20 e  
21 n  
22 ts  
23  
24  
25  
26  
27

28 C # Who will obtain informed consent or assent from potential 13, 14  
29 o 2 trial participants or authorised surrogates, and how (see  
30 n 6 Item 32)  
31 s a  
32 e  
33 n  
34 t  
35 o  
36 r  
37 a  
38 s  
39 s  
40 e  
41 n  
42 t  
43  
44  
45  
46  
47  
48  
49  
50  
51  
52  
53  
54  
55  
56  
57  
58  
59  
60

|    |     |                                                         |     |
|----|-----|---------------------------------------------------------|-----|
| 1  | C # | Additional consent provisions for collection and use of | N/A |
| 2  |     |                                                         |     |
| 3  | o 2 | participant data and biological specimens in ancillary  |     |
| 4  | n 6 | studies, if applicable                                  |     |
| 5  |     |                                                         |     |
| 6  | s b |                                                         |     |
| 7  | e   |                                                         |     |
| 8  |     |                                                         |     |
| 9  | n   |                                                         |     |
| 10 |     |                                                         |     |
| 11 | t   |                                                         |     |
| 12 | o   |                                                         |     |
| 13 |     |                                                         |     |
| 14 | r   |                                                         |     |
| 15 | a   |                                                         |     |
| 16 | s   |                                                         |     |
| 17 | s   |                                                         |     |
| 18 | e   |                                                         |     |
| 19 | n   |                                                         |     |
| 20 |     |                                                         |     |
| 21 | n   |                                                         |     |
| 22 | t:  |                                                         |     |
| 23 | a   |                                                         |     |
| 24 |     |                                                         |     |
| 25 | n   |                                                         |     |
| 26 | c   |                                                         |     |
| 27 |     |                                                         |     |
| 28 | il  |                                                         |     |
| 29 |     |                                                         |     |
| 30 | l   |                                                         |     |
| 31 | a   |                                                         |     |
| 32 | r   |                                                         |     |
| 33 |     |                                                         |     |
| 34 | y   |                                                         |     |
| 35 |     |                                                         |     |
| 36 | st  |                                                         |     |
| 37 | u   |                                                         |     |
| 38 | d   |                                                         |     |
| 39 |     |                                                         |     |
| 40 | i   |                                                         |     |
| 41 | e   |                                                         |     |
| 42 |     |                                                         |     |
| 43 | s   |                                                         |     |
| 44 |     |                                                         |     |
| 45 |     |                                                         |     |
| 46 |     |                                                         |     |
| 47 |     |                                                         |     |
| 48 |     |                                                         |     |
| 49 |     |                                                         |     |
| 50 |     |                                                         |     |
| 51 |     |                                                         |     |
| 52 |     |                                                         |     |
| 53 |     |                                                         |     |
| 54 |     |                                                         |     |
| 55 |     |                                                         |     |
| 56 |     |                                                         |     |
| 57 |     |                                                         |     |
| 58 |     |                                                         |     |
| 59 |     |                                                         |     |
| 60 |     |                                                         |     |

1 C # How personal information about potential and enrolled 13, 14  
2  
3 o 2 participants will be collected, shared, and maintained in  
4 n 7 order to protect confidentiality before, during, and after the  
5 fi trial  
6  
7 d  
8  
9 e  
10  
11 n  
12 ti  
13 a  
14 li  
15 t  
16  
17 y

20  
21 D # Financial and other competing interests for principal 28  
22 e 2 investigators for the overall trial and each study site  
23 c 8  
24  
25 l  
26  
27 a  
28  
29 r  
30  
31 a  
32 ti  
33 o  
34 n  
35  
36 o  
37 f  
38  
39 i  
40  
41 n  
42 t  
43 e  
44  
45 r  
46  
47 e  
48 st  
49 s

1 D # Statement of who will have access to the final trial dataset, N/A  
2  
3 a 2 and disclosure of contractual agreements that limit such  
4 t 9 access for investigators  
5

6 a  
7 a  
8 c  
9 c  
10 c  
11 e  
12 s  
13 s  
14  
15

17 A # Provisions, if any, for ancillary and post-trial care, and for N/A  
18 n 3 compensation to those who suffer harm from trial  
19 c 0 participation  
20

21 il  
22 l  
23 a  
24 r  
25 y  
26 a  
27 n  
28 d  
29 p  
30 o  
31 st  
32 tr  
33 i  
34 a  
35 l  
36 c  
37 a  
38 r  
39 e  
40  
41  
42  
43  
44  
45  
46  
47  
48  
49  
50  
51  
52  
53  
54  
55  
56  
57  
58  
59  
60

1 D # Plans for investigators and sponsor to communicate trial N/A  
2  
3 is 3 results to participants, healthcare professionals, the public,  
4 s 1 and other relevant groups (eg, via publication, reporting in  
5 e a results databases, or other data sharing arrangements),  
6 m including any publication restrictions  
7  
8 i  
9  
10 n  
11 a  
12 ti  
13 o  
14 n  
15 p  
16 o  
17 li  
18 c  
19 y  
20 :  
21 tr  
22 i  
23 a  
24 l  
25 r  
26 e  
27 s  
28 u  
29 lt  
30 s  
31  
32  
33  
34  
35  
36  
37  
38  
39  
40  
41  
42  
43  
44  
45  
46  
47  
48  
49  
50  
51  
52  
53  
54  
55  
56  
57  
58  
59  
60



|    |      |                                                           |     |
|----|------|-----------------------------------------------------------|-----|
| 1  | D #  | Authorship eligibility guidelines and any intended use of | N/A |
| 2  |      |                                                           |     |
| 3  | is 3 | professional writers                                      |     |
| 4  | s 1  |                                                           |     |
| 5  | e b  |                                                           |     |
| 6  |      |                                                           |     |
| 7  | m    |                                                           |     |
| 8  |      |                                                           |     |
| 9  | i    |                                                           |     |
| 10 |      |                                                           |     |
| 11 | n    |                                                           |     |
| 12 |      |                                                           |     |
| 13 | a    |                                                           |     |
| 14 |      |                                                           |     |
| 15 | ti   |                                                           |     |
| 16 |      |                                                           |     |
| 17 | o    |                                                           |     |
| 18 |      |                                                           |     |
| 19 | n    |                                                           |     |
| 20 |      |                                                           |     |
| 21 | p    |                                                           |     |
| 22 |      |                                                           |     |
| 23 | o    |                                                           |     |
| 24 |      |                                                           |     |
| 25 | li   |                                                           |     |
| 26 |      |                                                           |     |
| 27 | c    |                                                           |     |
| 28 |      |                                                           |     |
| 29 | y    |                                                           |     |
| 30 |      |                                                           |     |
| 31 | :    |                                                           |     |
| 32 |      |                                                           |     |
| 33 | a    |                                                           |     |
| 34 |      |                                                           |     |
| 35 | u    |                                                           |     |
| 36 |      |                                                           |     |
| 37 | t    |                                                           |     |
| 38 |      |                                                           |     |
| 39 | h    |                                                           |     |
| 40 |      |                                                           |     |
| 41 | o    |                                                           |     |
| 42 |      |                                                           |     |
| 43 | r    |                                                           |     |
| 44 |      |                                                           |     |
| 45 | s    |                                                           |     |
| 46 |      |                                                           |     |
| 47 | h    |                                                           |     |
| 48 |      |                                                           |     |
| 49 | i    |                                                           |     |
| 50 |      |                                                           |     |
| 51 | p    |                                                           |     |
| 52 |      |                                                           |     |
| 53 |      |                                                           |     |
| 54 |      |                                                           |     |
| 55 |      |                                                           |     |
| 56 |      |                                                           |     |
| 57 |      |                                                           |     |
| 58 |      |                                                           |     |
| 59 |      |                                                           |     |
| 60 |      |                                                           |     |

1 D # Plans, if any, for granting public access to the full protocol, N/A  
2 is 3 participant-level dataset, and statistical code  
3 s 1  
4 e c  
5 m  
6 i  
7 n  
8 a  
9 ti  
10 o  
11 n  
12 p  
13 o  
14 li  
15 c  
16 y  
17 :  
18 r  
19 e  
20 p  
21 r  
22 o  
23 d  
24 u  
25 c  
26 i  
27 b  
28 l  
29 e  
30 r  
31 e  
32 s  
33 e  
34 a  
35 r  
36 c  
37 h

|    |    |   |                                                               |     |
|----|----|---|---------------------------------------------------------------|-----|
| 1  | I  | # | Model consent form and other related documentation given      | N/A |
| 2  |    |   |                                                               |     |
| 3  | n  | 3 | to participants and authorised surrogates                     |     |
| 4  | f  | 2 |                                                               |     |
| 5  |    |   |                                                               |     |
| 6  | o  |   |                                                               |     |
| 7  | r  |   |                                                               |     |
| 8  |    |   |                                                               |     |
| 9  | m  |   |                                                               |     |
| 10 |    |   |                                                               |     |
| 11 | e  |   |                                                               |     |
| 12 | d  |   |                                                               |     |
| 13 |    |   |                                                               |     |
| 14 | c  |   |                                                               |     |
| 15 | o  |   |                                                               |     |
| 16 |    |   |                                                               |     |
| 17 | n  |   |                                                               |     |
| 18 | s  |   |                                                               |     |
| 19 |    |   |                                                               |     |
| 20 | e  |   |                                                               |     |
| 21 | n  |   |                                                               |     |
| 22 | t  |   |                                                               |     |
| 23 |    |   |                                                               |     |
| 24 | m  |   |                                                               |     |
| 25 |    |   |                                                               |     |
| 26 | a  |   |                                                               |     |
| 27 | t  |   |                                                               |     |
| 28 |    |   |                                                               |     |
| 29 | e  |   |                                                               |     |
| 30 | ri |   |                                                               |     |
| 31 |    |   |                                                               |     |
| 32 | a  |   |                                                               |     |
| 33 | ls |   |                                                               |     |
| 34 |    |   |                                                               |     |
| 35 |    |   |                                                               |     |
| 36 | B  | # | Plans for collection, laboratory evaluation, and storage of   | N/A |
| 37 | i  | 3 | biological specimens for genetic or molecular analysis in     |     |
| 38 |    |   |                                                               |     |
| 39 | o  | 3 | the current trial and for future use in ancillary studies, if |     |
| 40 |    |   |                                                               |     |
| 41 | l  |   | applicable                                                    |     |
| 42 |    |   |                                                               |     |
| 43 | o  |   |                                                               |     |
| 44 |    |   |                                                               |     |
| 45 | g  |   |                                                               |     |
| 46 |    |   |                                                               |     |
| 47 | i  |   |                                                               |     |
| 48 |    |   |                                                               |     |
| 49 | c  |   |                                                               |     |
| 50 |    |   |                                                               |     |
| 51 | a  |   |                                                               |     |
| 52 |    |   |                                                               |     |
| 53 | l  |   |                                                               |     |
| 54 |    |   |                                                               |     |
| 55 | s  |   |                                                               |     |
| 56 |    |   |                                                               |     |
| 57 | p  |   |                                                               |     |
| 58 |    |   |                                                               |     |
| 59 | e  |   |                                                               |     |
| 60 |    |   |                                                               |     |
|    | c  |   |                                                               |     |
|    |    |   |                                                               |     |
|    | i  |   |                                                               |     |

1 m  
2 e  
3 n  
4 n  
5 s  
6  
7  
8  
9  
10  
11  
12  
13  
14  
15  
16  
17  
18  
19  
20  
21  
22  
23  
24

## Author notes

1. 15, 16, 17, 18

The SPIRIT checklist is distributed under the terms of the Creative Commons Attribution License CC-BY-ND 3.0. This checklist was completed on 12. December 2018 using <http://www.goodreports.org/>, a tool made by the [EQUATOR Network](#) in collaboration with [Penelope.ai](#)
